# Supplementary material
Source: MDPI journal article supplement (https://www.mdpi.com/2076-3417/11/12/5584)
Supplement: s1 [file s1]

### Supplementary data 3. Cell orientation analysis

We worked on phase contrast microscopic images (magnification 20x) of the hCMEC/D3 cell monolayer cultured in our device for 7 days in dynamic or static conditions in triplicate. Using FIJI software (National Institute of Health), the alignment was corrected by rotation so that the lateral wall of the channel precisely matches to the horizontality (represented by 0°), and cropped in a 1440 x 1440-pixel format. Images are presented in **Figure S3.1**.

Then, the FIJI Directionality plug-in was used to quantify the amount of structures for each direction from -90° to 90°. 0° represents the east direction, while 90° is the north and -90° is the south direction. Briefly, each image was subjected to a Fourier spectrum analysis to generate a periodic pattern. Then application of angular filters allows to measure the direction of each structure. More information about this plug-in is available in <https://imagej.net/Directionality>.

Data were collected in Excel (Microsoft) and reported in **Table S3.1**. A Student T-test was performed between conditions for each direction, and means  $\pm$  standard deviations were plotted (**Figure S3.2**).

Results show that hCMEC/D3 cells exhibit a random orientation after 7 days in static condition. Conversely, cells cultured in dynamic condition have a preferred orientation around 0°. This direction corresponds to the channel axis, that is more interestingly the flow direction. In this condition, there are four times more cells aligned with the direction of flow than perpendicular to the flow. Static and fluidic conditions are significantly different ( $p < 0.05$ ) for all directions except from -62° to -25° and 13° to 43°.

These data strengthen the fact that hCMEC/D3 cells respond to shear stress stimulation and are able to adapt consequently. Some investigations have to be carried out to understand the underlying mechanisms of this preferential orientation.



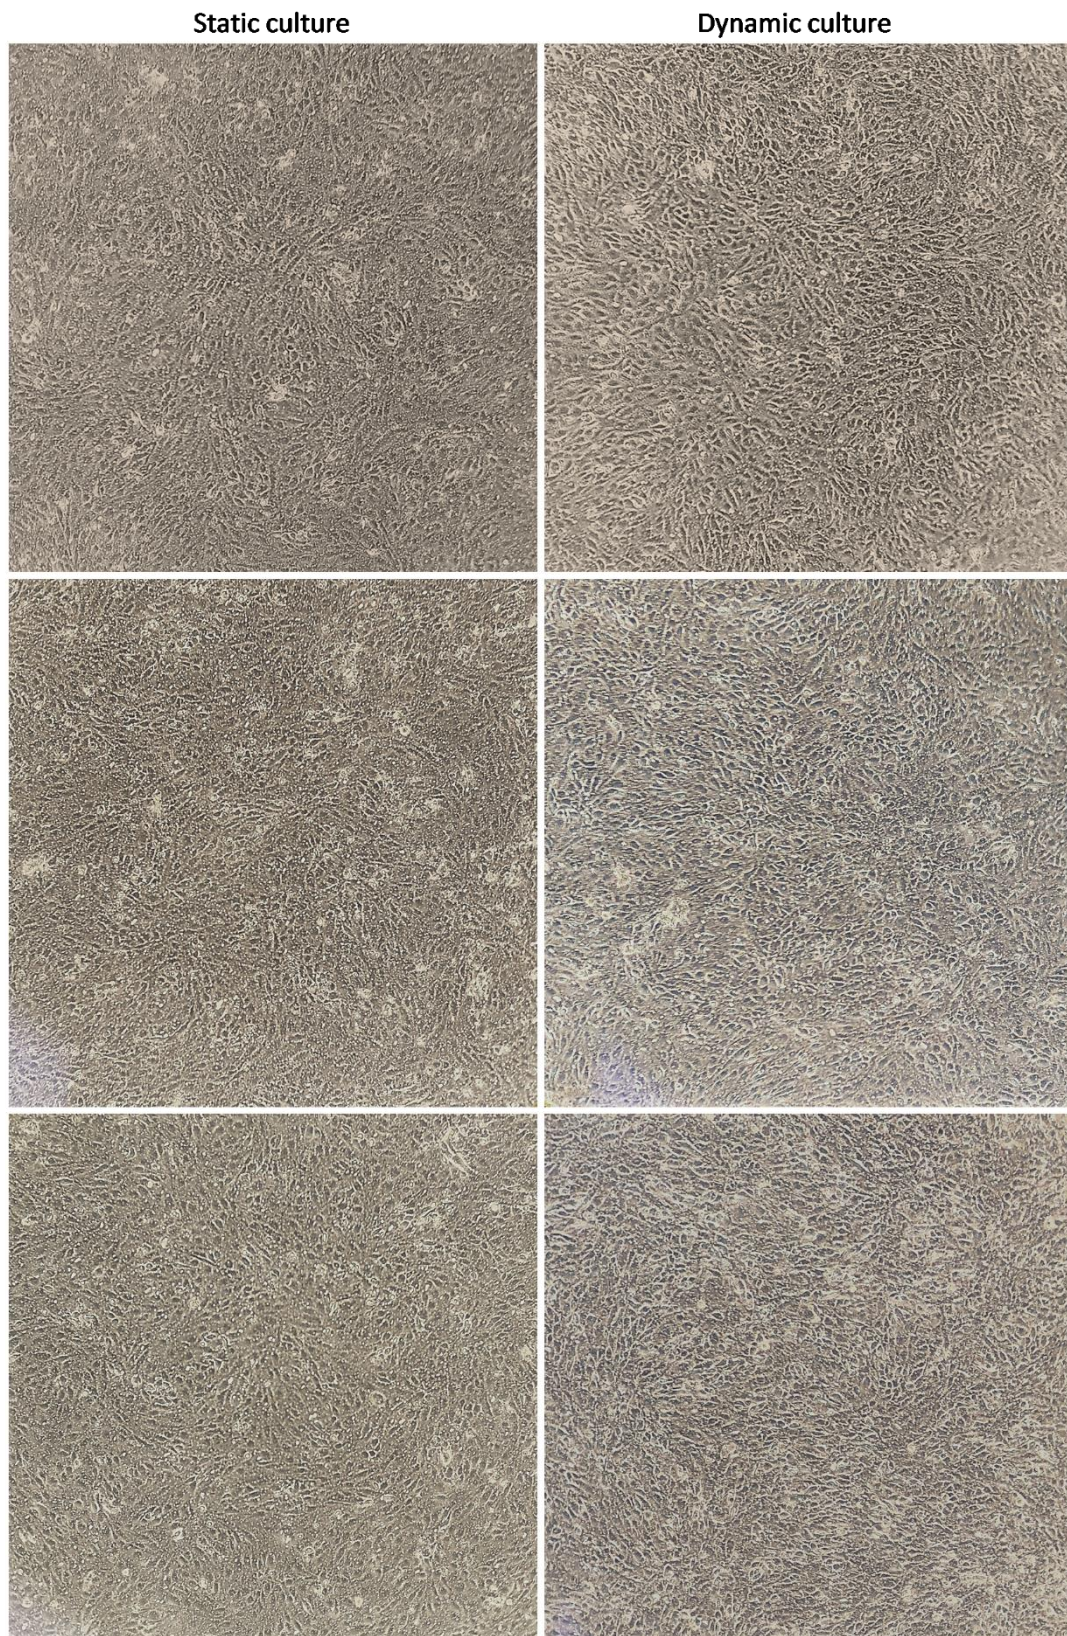

**Figure S3.1.** Images taken by phase contrast microscopy (magnification x20) after 7 days of culture of hCMEC/d3 cells in our barrier device in static (left images) or dynamic (right images) conditions in triplicate. Channel axis is horizontal. Images are composed of 1440 x 1440 pixels.



| Direction<br>(in degree) | Amount of structures     |         |         |                           |         |         |
|--------------------------|--------------------------|---------|---------|---------------------------|---------|---------|
|                          | Static culture condition |         |         | Fluidic culture condition |         |         |
|                          | Image 1                  | Image 2 | Image 3 | Image 1                   | Image 2 | Image 3 |
| -90                      | 0,0113                   | 0,0127  | 0,0149  | 0,0071                    | 0,0048  | 0,0064  |
| -87,98                   | 0,0112                   | 0,0120  | 0,0142  | 0,0066                    | 0,0048  | 0,0062  |
| -85,96                   | 0,0111                   | 0,0117  | 0,0142  | 0,0064                    | 0,0047  | 0,0063  |
| -83,93                   | 0,0101                   | 0,0116  | 0,0138  | 0,0061                    | 0,0050  | 0,0065  |
| -81,91                   | 0,0110                   | 0,0112  | 0,0140  | 0,0068                    | 0,0050  | 0,0065  |
| -79,89                   | 0,0108                   | 0,0104  | 0,0136  | 0,0068                    | 0,0053  | 0,0066  |
| -77,87                   | 0,0100                   | 0,0110  | 0,0130  | 0,0067                    | 0,0050  | 0,0066  |
| -75,84                   | 0,0100                   | 0,0111  | 0,0125  | 0,0069                    | 0,0050  | 0,0068  |
| -73,82                   | 0,0103                   | 0,0104  | 0,0122  | 0,0071                    | 0,0050  | 0,0068  |
| -71,80                   | 0,0100                   | 0,0106  | 0,0122  | 0,0072                    | 0,0053  | 0,0075  |
| -69,78                   | 0,0099                   | 0,0097  | 0,0123  | 0,0072                    | 0,0054  | 0,0075  |
| -67,75                   | 0,0101                   | 0,0109  | 0,0114  | 0,0075                    | 0,0056  | 0,0071  |
| -65,73                   | 0,0098                   | 0,0104  | 0,0109  | 0,0085                    | 0,0058  | 0,0073  |
| -63,71                   | 0,0099                   | 0,0095  | 0,0104  | 0,0081                    | 0,0061  | 0,0084  |
| -61,69                   | 0,0101                   | 0,0097  | 0,0117  | 0,0088                    | 0,0063  | 0,0087  |
| -59,66                   | 0,0103                   | 0,0095  | 0,0110  | 0,0091                    | 0,0062  | 0,0088  |
| -57,64                   | 0,0104                   | 0,0096  | 0,0101  | 0,0103                    | 0,0067  | 0,0086  |
| -55,62                   | 0,0097                   | 0,0096  | 0,0101  | 0,0095                    | 0,0066  | 0,0085  |
| -53,60                   | 0,0102                   | 0,0093  | 0,0104  | 0,0100                    | 0,0064  | 0,0094  |
| -51,57                   | 0,0108                   | 0,0102  | 0,0103  | 0,0107                    | 0,0071  | 0,0100  |
| -49,55                   | 0,0099                   | 0,0099  | 0,0097  | 0,0105                    | 0,0075  | 0,0103  |
| -47,53                   | 0,0112                   | 0,0100  | 0,0093  | 0,0116                    | 0,0077  | 0,0103  |
| -45,51                   | 0,0107                   | 0,0098  | 0,0092  | 0,0124                    | 0,0086  | 0,0108  |
| -43,48                   | 0,0110                   | 0,0100  | 0,0094  | 0,0130                    | 0,0090  | 0,0105  |
| -41,46                   | 0,0114                   | 0,0094  | 0,0100  | 0,0146                    | 0,0087  | 0,0108  |
| -39,44                   | 0,0114                   | 0,0103  | 0,0090  | 0,0148                    | 0,0091  | 0,0120  |
| -37,42                   | 0,0110                   | 0,0105  | 0,0096  | 0,0156                    | 0,0098  | 0,0120  |
| -35,39                   | 0,0114                   | 0,0098  | 0,0095  | 0,0166                    | 0,0100  | 0,0123  |
| -33,37                   | 0,0115                   | 0,0107  | 0,0088  | 0,0174                    | 0,0103  | 0,0124  |
| -31,35                   | 0,0117                   | 0,0106  | 0,0094  | 0,0177                    | 0,0131  | 0,0123  |
| -29,33                   | 0,0112                   | 0,0107  | 0,0095  | 0,0182                    | 0,0129  | 0,0130  |
| -27,30                   | 0,0117                   | 0,0105  | 0,0089  | 0,0188                    | 0,0137  | 0,0134  |
| -25,28                   | 0,0125                   | 0,0110  | 0,0089  | 0,0181                    | 0,0139  | 0,0143  |
| -23,26                   | 0,0118                   | 0,0111  | 0,0087  | 0,0188                    | 0,0140  | 0,0156  |
| -21,24                   | 0,0115                   | 0,0110  | 0,0090  | 0,0193                    | 0,0153  | 0,0139  |
| -19,21                   | 0,0120                   | 0,0116  | 0,0093  | 0,0200                    | 0,0171  | 0,0154  |
| -17,19                   | 0,0117                   | 0,0114  | 0,0092  | 0,0196                    | 0,0164  | 0,0157  |
| -15,17                   | 0,0119                   | 0,0111  | 0,0087  | 0,0190                    | 0,0185  | 0,0167  |
| -13,15                   | 0,0113                   | 0,0109  | 0,0091  | 0,0195                    | 0,0187  | 0,0166  |
| -11,12                   | 0,0117                   | 0,0105  | 0,0091  | 0,0212                    | 0,0199  | 0,0169  |
| -9,10                    | 0,0122                   | 0,0106  | 0,0089  | 0,0195                    | 0,0196  | 0,0172  |
| -7,08                    | 0,0120                   | 0,0109  | 0,0091  | 0,0177                    | 0,0218  | 0,0175  |
| -5,06                    | 0,0117                   | 0,0114  | 0,0088  | 0,0191                    | 0,0217  | 0,0170  |
| -3,03                    | 0,0120                   | 0,0111  | 0,0087  | 0,0183                    | 0,0218  | 0,0176  |
| -1,01                    | 0,0129                   | 0,0110  | 0,0089  | 0,0176                    | 0,0238  | 0,0174  |
| 1,01                     | 0,0125                   | 0,0109  | 0,0093  | 0,0178                    | 0,0244  | 0,0170  |
| 3,03                     | 0,0118                   | 0,0108  | 0,0097  | 0,0176                    | 0,0243  | 0,0174  |
| 5,06                     | 0,0121                   | 0,0111  | 0,0094  | 0,0167                    | 0,0234  | 0,0192  |
| 7,08                     | 0,0122                   | 0,0112  | 0,0094  | 0,0164                    | 0,0244  | 0,0176  |
| 9,10                     | 0,0123                   | 0,0115  | 0,0097  | 0,0165                    | 0,0243  | 0,0176  |
| 11,12                    | 0,0129                   | 0,0111  | 0,0100  | 0,0152                    | 0,0237  | 0,0176  |
| 13,15                    | 0,0131                   | 0,0110  | 0,0100  | 0,0142                    | 0,0237  | 0,0176  |
| 15,17                    | 0,0129                   | 0,0117  | 0,0106  | 0,0131                    | 0,0236  | 0,0172  |
| 17,19                    | 0,0132                   | 0,0114  | 0,0106  | 0,0130                    | 0,0218  | 0,0167  |
| 19,21                    | 0,0135                   | 0,0113  | 0,0112  | 0,0118                    | 0,0205  | 0,0161  |

|       |        |        |        |        |        |        |
|-------|--------|--------|--------|--------|--------|--------|
| 21,24 | 0,0120 | 0,0112 | 0,0105 | 0,0130 | 0,0188 | 0,0159 |
| 23,26 | 0,0124 | 0,0118 | 0,0103 | 0,0121 | 0,0178 | 0,0155 |
| 25,28 | 0,0126 | 0,0111 | 0,0106 | 0,0109 | 0,0177 | 0,0152 |
| 27,30 | 0,0121 | 0,0118 | 0,0106 | 0,0102 | 0,0157 | 0,0143 |
| 29,33 | 0,0120 | 0,0107 | 0,0110 | 0,0093 | 0,0155 | 0,0139 |
| 31,35 | 0,0120 | 0,0114 | 0,0109 | 0,0092 | 0,0141 | 0,0130 |
| 33,37 | 0,0116 | 0,0110 | 0,0113 | 0,0083 | 0,0125 | 0,0129 |
| 35,39 | 0,0112 | 0,0115 | 0,0113 | 0,0082 | 0,0119 | 0,0114 |
| 37,42 | 0,0111 | 0,0118 | 0,0113 | 0,0075 | 0,0109 | 0,0119 |
| 39,44 | 0,0111 | 0,0118 | 0,0116 | 0,0078 | 0,0101 | 0,0118 |
| 41,46 | 0,0105 | 0,0114 | 0,0116 | 0,0075 | 0,0093 | 0,0112 |
| 43,48 | 0,0108 | 0,0114 | 0,0115 | 0,0070 | 0,0085 | 0,0104 |
| 45,51 | 0,0106 | 0,0112 | 0,0118 | 0,0072 | 0,0084 | 0,0101 |
| 47,53 | 0,0106 | 0,0114 | 0,0115 | 0,0066 | 0,0077 | 0,0094 |
| 49,55 | 0,0105 | 0,0114 | 0,0118 | 0,0065 | 0,0074 | 0,0087 |
| 51,57 | 0,0099 | 0,0115 | 0,0124 | 0,0067 | 0,0067 | 0,0090 |
| 53,60 | 0,0097 | 0,0120 | 0,0120 | 0,0065 | 0,0058 | 0,0080 |
| 55,62 | 0,0105 | 0,0127 | 0,0119 | 0,0065 | 0,0062 | 0,0079 |
| 57,64 | 0,0106 | 0,0115 | 0,0129 | 0,0070 | 0,0059 | 0,0080 |
| 59,66 | 0,0106 | 0,0109 | 0,0124 | 0,0063 | 0,0055 | 0,0075 |
| 61,69 | 0,0101 | 0,0116 | 0,0121 | 0,0064 | 0,0054 | 0,0071 |
| 63,71 | 0,0093 | 0,0126 | 0,0126 | 0,0063 | 0,0049 | 0,0068 |
| 65,73 | 0,0101 | 0,0125 | 0,0124 | 0,0063 | 0,0052 | 0,0068 |
| 67,75 | 0,0101 | 0,0118 | 0,0129 | 0,0062 | 0,0050 | 0,0064 |
| 69,78 | 0,0099 | 0,0120 | 0,0130 | 0,0067 | 0,0048 | 0,0066 |
| 71,80 | 0,0101 | 0,0129 | 0,0123 | 0,0063 | 0,0050 | 0,0069 |
| 73,82 | 0,0099 | 0,0121 | 0,0136 | 0,0067 | 0,0049 | 0,0064 |
| 75,84 | 0,0099 | 0,0121 | 0,0138 | 0,0067 | 0,0048 | 0,0062 |
| 77,87 | 0,0106 | 0,0115 | 0,0134 | 0,0064 | 0,0048 | 0,0061 |
| 79,89 | 0,0106 | 0,0119 | 0,0136 | 0,0066 | 0,0049 | 0,0061 |
| 81,91 | 0,0109 | 0,0127 | 0,0135 | 0,0064 | 0,0051 | 0,0063 |
| 83,93 | 0,0100 | 0,0113 | 0,0129 | 0,0067 | 0,0047 | 0,0065 |
| 85,96 | 0,0108 | 0,0120 | 0,0136 | 0,0062 | 0,0047 | 0,0063 |
| 87,98 | 0,0109 | 0,0121 | 0,0147 | 0,0064 | 0,0052 | 0,0065 |
| 90    | 0,0113 | 0,0127 | 0,0149 | 0,0071 | 0,0048 | 0,0064 |

**Table S1.3.** Amount of structures per direction (in degree). Cells were cultured 7 days in static (blue line) of dynamic (red line) conditions in our barrier device. Three different images were taken by contrast phase microscopy. These data provided from the Directionality plug-in in FIJI software (NIH).

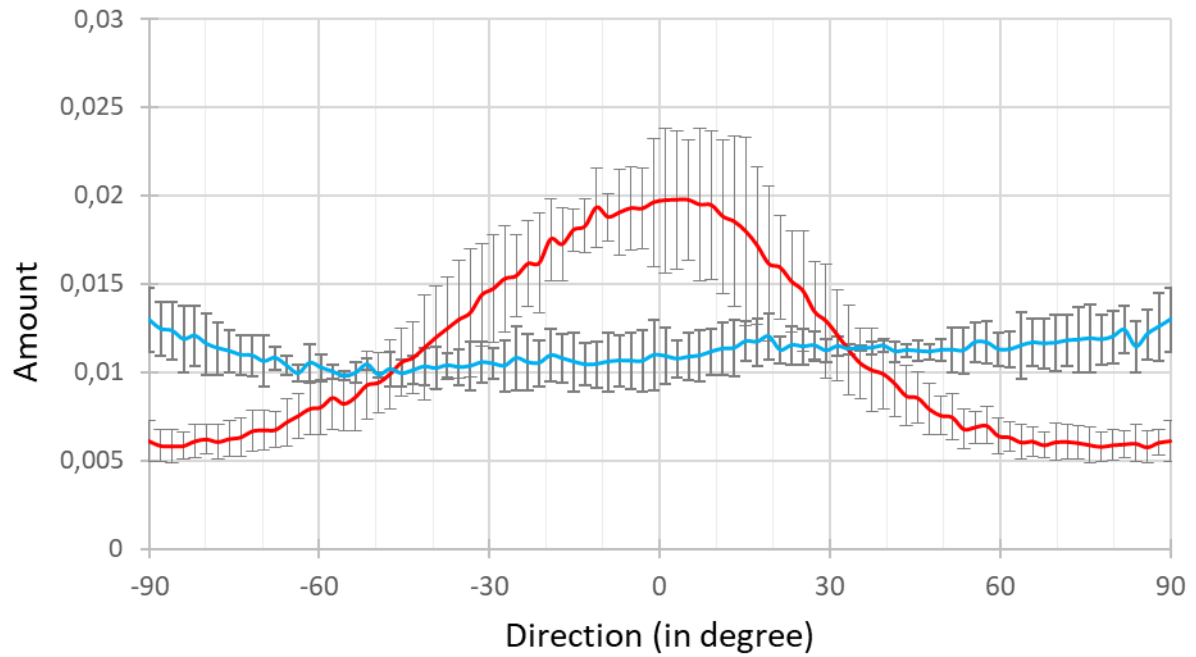

**Figure S3.2.** Distribution of hCMEC/D3 cell orientation relative to the channel axis (0°). Cells were cultured 7 days in static (blue line) of dynamic (red line) conditions in our barrier device. Images from three different were taken by contrast phase microscopy and analyzed by the Directionality plug-in in FIJI software (NIH). The amount of structures for each direction is given as mean  $\pm$  standard deviation. Graph was plotted in Excel (Microsoft).
