# Supplementary material
Source: MDPI journal article supplement (https://www.mdpi.com/2076-3417/11/12/5584)
Supplement: s1 [file s1]

Archive with 13 entries (13 files):
- hepia_bbb_bottom.dxf
- hepia_bbb_bottom.stp
- hepia_bbb_lower_channel.dxf
- hepia_bbb_lower_channel.stp
- hepia_bbb_template.dxf
- hepia_bbb_template.stp
- hepia_bbb_top.dxf
- hepia_bbb_top.stp
- hepia_bbb_upper_channel.dxf
- hepia_bbb_upper_channel.stp
- Supplementary data 1 revised.pdf
- Supplementary data 2 revised.pdf
- Supplementary data 3 revised.pdf
