# Supplementary material
Source: MDPI journal article supplement (https://www.mdpi.com/2076-3417/11/12/5584)
Supplement: s1 [file s1 › hepia_bbb_bottom.stp]

ISO-10303-21;
HEADER;
FILE_DESCRIPTION((''),'2;1');
FILE_NAME('BCBBBV6_FOND','2020-11-24T11:10:12',('loris.gomezbai'),(''),
'CREO PARAMETRIC BY PTC INC, 2016390','CREO PARAMETRIC BY PTC INC, 2016390','');
FILE_SCHEMA(('AUTOMOTIVE_DESIGN { 1 0 10303 214 1 1 1 1 }'));
ENDSEC;
DATA;
#94=CARTESIAN_POINT('',(3.25E1,0.E0,-7.5E0));
#95=DIRECTION('',(0.E0,1.E0,0.E0));
#96=DIRECTION('',(1.E0,0.E0,0.E0));
#97=AXIS2_PLACEMENT_3D('',#94,#95,#96);
#99=DRAUGHTING_PRE_DEFINED_CURVE_FONT('continuous');
#100=CURVE_STYLE('',#99,POSITIVE_LENGTH_MEASURE(2.E-2),#67);
#101=PRESENTATION_STYLE_ASSIGNMENT((#100));
#102=STYLED_ITEM('',(#101),#98);
#103=CARTESIAN_POINT('',(3.25E1,0.E0,-7.5E0));
#104=DIRECTION('',(0.E0,1.E0,0.E0));
#105=DIRECTION('',(-1.E0,0.E0,0.E0));
#106=AXIS2_PLACEMENT_3D('',#103,#104,#105);
#108=CURVE_STYLE('',#99,POSITIVE_LENGTH_MEASURE(2.E-2),#67);
#109=PRESENTATION_STYLE_ASSIGNMENT((#108));
#110=STYLED_ITEM('',(#109),#107);
#111=CARTESIAN_POINT('',(-3.25E1,0.E0,7.5E0));
#112=DIRECTION('',(0.E0,1.E0,0.E0));
#113=DIRECTION('',(1.E0,0.E0,0.E0));
#114=AXIS2_PLACEMENT_3D('',#111,#112,#113);
#116=CURVE_STYLE('',#99,POSITIVE_LENGTH_MEASURE(2.E-2),#67);
#117=PRESENTATION_STYLE_ASSIGNMENT((#116));
#118=STYLED_ITEM('',(#117),#115);
#119=CARTESIAN_POINT('',(-3.25E1,0.E0,7.5E0));
#120=DIRECTION('',(0.E0,1.E0,0.E0));
#121=DIRECTION('',(-1.E0,0.E0,0.E0));
#122=AXIS2_PLACEMENT_3D('',#119,#120,#121);
#124=CURVE_STYLE('',#99,POSITIVE_LENGTH_MEASURE(2.E-2),#67);
#125=PRESENTATION_STYLE_ASSIGNMENT((#124));
#126=STYLED_ITEM('',(#125),#123);
#127=DIRECTION('',(7.071067811865E-1,0.E0,-7.071067811865E-1));
#128=VECTOR('',#127,7.071067811865E0);
#129=CARTESIAN_POINT('',(-3.75E1,0.E0,-7.5E0));
#130=LINE('',#129,#128);
#131=CURVE_STYLE('',#99,POSITIVE_LENGTH_MEASURE(2.E-2),#67);
#132=PRESENTATION_STYLE_ASSIGNMENT((#131));
#133=STYLED_ITEM('',(#132),#130);
#134=DIRECTION('',(0.E0,0.E0,1.E0));
#135=VECTOR('',#134,2.E1);
#136=CARTESIAN_POINT('',(-3.75E1,0.E0,-7.5E0));
#137=LINE('',#136,#135);
#138=CURVE_STYLE('',#99,POSITIVE_LENGTH_MEASURE(2.E-2),#67);
#139=PRESENTATION_STYLE_ASSIGNMENT((#138));
#140=STYLED_ITEM('',(#139),#137);
#141=DIRECTION('',(1.E0,0.E0,0.E0));
#142=VECTOR('',#141,7.5E1);
#143=CARTESIAN_POINT('',(-3.75E1,0.E0,1.25E1));
#144=LINE('',#143,#142);
#145=CURVE_STYLE('',#99,POSITIVE_LENGTH_MEASURE(2.E-2),#67);
#146=PRESENTATION_STYLE_ASSIGNMENT((#145));
#147=STYLED_ITEM('',(#146),#144);
#148=DIRECTION('',(0.E0,0.E0,-1.E0));
#149=VECTOR('',#148,2.5E1);
#150=CARTESIAN_POINT('',(3.75E1,0.E0,1.25E1));
#151=LINE('',#150,#149);
#152=CURVE_STYLE('',#99,POSITIVE_LENGTH_MEASURE(2.E-2),#67);
#153=PRESENTATION_STYLE_ASSIGNMENT((#152));
#154=STYLED_ITEM('',(#153),#151);
#155=DIRECTION('',(-1.E0,0.E0,0.E0));
#156=VECTOR('',#155,7.E1);
#157=CARTESIAN_POINT('',(3.75E1,0.E0,-1.25E1));
#158=LINE('',#157,#156);
#159=CURVE_STYLE('',#99,POSITIVE_LENGTH_MEASURE(2.E-2),#67);
#160=PRESENTATION_STYLE_ASSIGNMENT((#159));
#161=STYLED_ITEM('',(#160),#158);
#162=DIRECTION('',(0.E0,1.E0,0.E0));
#163=VECTOR('',#162,3.E-1);
#164=CARTESIAN_POINT('',(3.35E1,0.E0,-7.5E0));
#165=LINE('',#164,#163);
#166=CURVE_STYLE('',#99,POSITIVE_LENGTH_MEASURE(2.E-2),#67);
#167=PRESENTATION_STYLE_ASSIGNMENT((#166));
#168=STYLED_ITEM('',(#167),#165);
#169=DIRECTION('',(0.E0,1.E0,0.E0));
#170=VECTOR('',#169,3.E-1);
#171=CARTESIAN_POINT('',(3.15E1,0.E0,-7.5E0));
#172=LINE('',#171,#170);
#173=CURVE_STYLE('',#99,POSITIVE_LENGTH_MEASURE(2.E-2),#67);
#174=PRESENTATION_STYLE_ASSIGNMENT((#173));
#175=STYLED_ITEM('',(#174),#172);
#176=CARTESIAN_POINT('',(3.25E1,3.E-1,-7.5E0));
#177=DIRECTION('',(0.E0,1.E0,0.E0));
#178=DIRECTION('',(1.E0,0.E0,0.E0));
#179=AXIS2_PLACEMENT_3D('',#176,#177,#178);
#181=CURVE_STYLE('',#99,POSITIVE_LENGTH_MEASURE(2.E-2),#67);
#182=PRESENTATION_STYLE_ASSIGNMENT((#181));
#183=STYLED_ITEM('',(#182),#180);
#184=CARTESIAN_POINT('',(3.25E1,3.E-1,-7.5E0));
#185=DIRECTION('',(0.E0,1.E0,0.E0));
#186=DIRECTION('',(-1.E0,0.E0,0.E0));
#187=AXIS2_PLACEMENT_3D('',#184,#185,#186);
#189=CURVE_STYLE('',#99,POSITIVE_LENGTH_MEASURE(2.E-2),#67);
#190=PRESENTATION_STYLE_ASSIGNMENT((#189));
#191=STYLED_ITEM('',(#190),#188);
#192=CARTESIAN_POINT('',(-3.25E1,3.E-1,7.5E0));
#193=DIRECTION('',(0.E0,1.E0,0.E0));
#194=DIRECTION('',(1.E0,0.E0,0.E0));
#195=AXIS2_PLACEMENT_3D('',#192,#193,#194);
#197=CURVE_STYLE('',#99,POSITIVE_LENGTH_MEASURE(2.E-2),#67);
#198=PRESENTATION_STYLE_ASSIGNMENT((#197));
#199=STYLED_ITEM('',(#198),#196);
#200=CARTESIAN_POINT('',(-3.25E1,3.E-1,7.5E0));
#201=DIRECTION('',(0.E0,1.E0,0.E0));
#202=DIRECTION('',(-1.E0,0.E0,0.E0));
#203=AXIS2_PLACEMENT_3D('',#200,#201,#202);
#205=CURVE_STYLE('',#99,POSITIVE_LENGTH_MEASURE(2.E-2),#67);
#206=PRESENTATION_STYLE_ASSIGNMENT((#205));
#207=STYLED_ITEM('',(#206),#204);
#208=DIRECTION('',(-7.071067811865E-1,0.E0,7.071067811865E-1));
#209=VECTOR('',#208,7.071067811865E0);
#210=CARTESIAN_POINT('',(-3.25E1,3.E-1,-1.25E1));
#211=LINE('',#210,#209);
#212=CURVE_STYLE('',#99,POSITIVE_LENGTH_MEASURE(2.E-2),#67);
#213=PRESENTATION_STYLE_ASSIGNMENT((#212));
#214=STYLED_ITEM('',(#213),#211);
#215=DIRECTION('',(-1.E0,0.E0,0.E0));
#216=VECTOR('',#215,7.E1);
#217=CARTESIAN_POINT('',(3.75E1,3.E-1,-1.25E1));
#218=LINE('',#217,#216);
#219=CURVE_STYLE('',#99,POSITIVE_LENGTH_MEASURE(2.E-2),#67);
#220=PRESENTATION_STYLE_ASSIGNMENT((#219));
#221=STYLED_ITEM('',(#220),#218);
#222=DIRECTION('',(0.E0,0.E0,-1.E0));
#223=VECTOR('',#222,2.5E1);
#224=CARTESIAN_POINT('',(3.75E1,3.E-1,1.25E1));
#225=LINE('',#224,#223);
#226=CURVE_STYLE('',#99,POSITIVE_LENGTH_MEASURE(2.E-2),#67);
#227=PRESENTATION_STYLE_ASSIGNMENT((#226));
#228=STYLED_ITEM('',(#227),#225);
#229=DIRECTION('',(1.E0,0.E0,0.E0));
#230=VECTOR('',#229,7.5E1);
#231=CARTESIAN_POINT('',(-3.75E1,3.E-1,1.25E1));
#232=LINE('',#231,#230);
#233=CURVE_STYLE('',#99,POSITIVE_LENGTH_MEASURE(2.E-2),#67);
#234=PRESENTATION_STYLE_ASSIGNMENT((#233));
#235=STYLED_ITEM('',(#234),#232);
#236=DIRECTION('',(0.E0,0.E0,1.E0));
#237=VECTOR('',#236,2.E1);
#238=CARTESIAN_POINT('',(-3.75E1,3.E-1,-7.5E0));
#239=LINE('',#238,#237);
#240=CURVE_STYLE('',#99,POSITIVE_LENGTH_MEASURE(2.E-2),#67);
#241=PRESENTATION_STYLE_ASSIGNMENT((#240));
#242=STYLED_ITEM('',(#241),#239);
#243=DIRECTION('',(0.E0,1.E0,0.E0));
#244=VECTOR('',#243,3.E-1);
#245=CARTESIAN_POINT('',(-3.15E1,0.E0,7.5E0));
#246=LINE('',#245,#244);
#247=CURVE_STYLE('',#99,POSITIVE_LENGTH_MEASURE(2.E-2),#67);
#248=PRESENTATION_STYLE_ASSIGNMENT((#247));
#249=STYLED_ITEM('',(#248),#246);
#250=DIRECTION('',(0.E0,1.E0,0.E0));
#251=VECTOR('',#250,3.E-1);
#252=CARTESIAN_POINT('',(-3.35E1,0.E0,7.5E0));
#253=LINE('',#252,#251);
#254=CURVE_STYLE('',#99,POSITIVE_LENGTH_MEASURE(2.E-2),#67);
#255=PRESENTATION_STYLE_ASSIGNMENT((#254));
#256=STYLED_ITEM('',(#255),#253);
#257=DIRECTION('',(0.E0,-1.E0,0.E0));
#258=VECTOR('',#257,3.E-1);
#259=CARTESIAN_POINT('',(-3.25E1,3.E-1,-1.25E1));
#260=LINE('',#259,#258);
#261=CURVE_STYLE('',#99,POSITIVE_LENGTH_MEASURE(2.E-2),#67);
#262=PRESENTATION_STYLE_ASSIGNMENT((#261));
#263=STYLED_ITEM('',(#262),#260);
#264=DIRECTION('',(0.E0,1.E0,0.E0));
#265=VECTOR('',#264,3.E-1);
#266=CARTESIAN_POINT('',(3.75E1,0.E0,-1.25E1));
#267=LINE('',#266,#265);
#268=CURVE_STYLE('',#99,POSITIVE_LENGTH_MEASURE(2.E-2),#67);
#269=PRESENTATION_STYLE_ASSIGNMENT((#268));
#270=STYLED_ITEM('',(#269),#267);
#271=DIRECTION('',(0.E0,1.E0,0.E0));
#272=VECTOR('',#271,3.E-1);
#273=CARTESIAN_POINT('',(3.75E1,0.E0,1.25E1));
#274=LINE('',#273,#272);
#275=CURVE_STYLE('',#99,POSITIVE_LENGTH_MEASURE(2.E-2),#67);
#276=PRESENTATION_STYLE_ASSIGNMENT((#275));
#277=STYLED_ITEM('',(#276),#274);
#278=DIRECTION('',(0.E0,1.E0,0.E0));
#279=VECTOR('',#278,3.E-1);
#280=CARTESIAN_POINT('',(-3.75E1,0.E0,1.25E1));
#281=LINE('',#280,#279);
#282=CURVE_STYLE('',#99,POSITIVE_LENGTH_MEASURE(2.E-2),#67);
#283=PRESENTATION_STYLE_ASSIGNMENT((#282));
#284=STYLED_ITEM('',(#283),#281);
#285=DIRECTION('',(0.E0,-1.E0,0.E0));
#286=VECTOR('',#285,3.E-1);
#287=CARTESIAN_POINT('',(-3.75E1,3.E-1,-7.5E0));
#288=LINE('',#287,#286);
#289=CURVE_STYLE('',#99,POSITIVE_LENGTH_MEASURE(2.E-2),#67);
#290=PRESENTATION_STYLE_ASSIGNMENT((#289));
#291=STYLED_ITEM('',(#290),#288);
#292=CARTESIAN_POINT('',(-3.75E1,0.E0,1.25E1));
#293=CARTESIAN_POINT('',(3.75E1,0.E0,1.25E1));
#294=VERTEX_POINT('',#292);
#295=VERTEX_POINT('',#293);
#296=CARTESIAN_POINT('',(3.75E1,0.E0,-1.25E1));
#297=VERTEX_POINT('',#296);
#298=CARTESIAN_POINT('',(-3.75E1,3.E-1,1.25E1));
#299=CARTESIAN_POINT('',(3.75E1,3.E-1,1.25E1));
#300=VERTEX_POINT('',#298);
#301=VERTEX_POINT('',#299);
#302=CARTESIAN_POINT('',(3.75E1,3.E-1,-1.25E1));
#303=VERTEX_POINT('',#302);
#304=CARTESIAN_POINT('',(3.35E1,0.E0,-7.5E0));
#305=CARTESIAN_POINT('',(3.15E1,0.E0,-7.5E0));
#306=VERTEX_POINT('',#304);
#307=VERTEX_POINT('',#305);
#308=CARTESIAN_POINT('',(-3.15E1,0.E0,7.5E0));
#309=CARTESIAN_POINT('',(-3.35E1,0.E0,7.5E0));
#310=VERTEX_POINT('',#308);
#311=VERTEX_POINT('',#309);
#312=CARTESIAN_POINT('',(3.35E1,3.E-1,-7.5E0));
#313=CARTESIAN_POINT('',(3.15E1,3.E-1,-7.5E0));
#314=VERTEX_POINT('',#312);
#315=VERTEX_POINT('',#313);
#316=CARTESIAN_POINT('',(-3.15E1,3.E-1,7.5E0));
#317=CARTESIAN_POINT('',(-3.35E1,3.E-1,7.5E0));
#318=VERTEX_POINT('',#316);
#319=VERTEX_POINT('',#317);
#320=CARTESIAN_POINT('',(-3.75E1,0.E0,-7.5E0));
#321=CARTESIAN_POINT('',(-3.25E1,0.E0,-1.25E1));
#322=VERTEX_POINT('',#320);
#323=VERTEX_POINT('',#321);
#324=CARTESIAN_POINT('',(-3.25E1,3.E-1,-1.25E1));
#325=VERTEX_POINT('',#324);
#326=CARTESIAN_POINT('',(-3.75E1,3.E-1,-7.5E0));
#327=VERTEX_POINT('',#326);
#328=CARTESIAN_POINT('',(0.E0,0.E0,0.E0));
#329=DIRECTION('',(0.E0,1.E0,0.E0));
#330=DIRECTION('',(1.E0,0.E0,0.E0));
#331=AXIS2_PLACEMENT_3D('',#328,#329,#330);
#332=PLANE('',#331);
#334=ORIENTED_EDGE('',*,*,#333,.F.);
#336=ORIENTED_EDGE('',*,*,#335,.T.);
#338=ORIENTED_EDGE('',*,*,#337,.T.);
#340=ORIENTED_EDGE('',*,*,#339,.T.);
#342=ORIENTED_EDGE('',*,*,#341,.T.);
#343=EDGE_LOOP('',(#334,#336,#338,#340,#342));
#344=FACE_OUTER_BOUND('',#343,.F.);
#346=ORIENTED_EDGE('',*,*,#345,.F.);
#348=ORIENTED_EDGE('',*,*,#347,.F.);
#349=EDGE_LOOP('',(#346,#348));
#350=FACE_BOUND('',#349,.F.);
#352=ORIENTED_EDGE('',*,*,#351,.F.);
#354=ORIENTED_EDGE('',*,*,#353,.F.);
#355=EDGE_LOOP('',(#352,#354));
#356=FACE_BOUND('',#355,.F.);
#358=CARTESIAN_POINT('',(3.25E1,0.E0,-7.5E0));
#359=DIRECTION('',(0.E0,1.E0,0.E0));
#360=DIRECTION('',(1.E0,0.E0,0.E0));
#361=AXIS2_PLACEMENT_3D('',#358,#359,#360);
#362=CYLINDRICAL_SURFACE('',#361,1.E0);
#363=ORIENTED_EDGE('',*,*,#351,.T.);
#365=ORIENTED_EDGE('',*,*,#364,.T.);
#367=ORIENTED_EDGE('',*,*,#366,.F.);
#369=ORIENTED_EDGE('',*,*,#368,.F.);
#370=EDGE_LOOP('',(#363,#365,#367,#369));
#371=FACE_OUTER_BOUND('',#370,.F.);
#373=CARTESIAN_POINT('',(3.25E1,0.E0,-7.5E0));
#374=DIRECTION('',(0.E0,1.E0,0.E0));
#375=DIRECTION('',(1.E0,0.E0,0.E0));
#376=AXIS2_PLACEMENT_3D('',#373,#374,#375);
#377=CYLINDRICAL_SURFACE('',#376,1.E0);
#378=ORIENTED_EDGE('',*,*,#353,.T.);
#379=ORIENTED_EDGE('',*,*,#368,.T.);
#381=ORIENTED_EDGE('',*,*,#380,.F.);
#382=ORIENTED_EDGE('',*,*,#364,.F.);
#383=EDGE_LOOP('',(#378,#379,#381,#382));
#384=FACE_OUTER_BOUND('',#383,.F.);
#386=CARTESIAN_POINT('',(0.E0,3.E-1,0.E0));
#387=DIRECTION('',(0.E0,1.E0,0.E0));
#388=DIRECTION('',(1.E0,0.E0,0.E0));
#389=AXIS2_PLACEMENT_3D('',#386,#387,#388);
#390=PLANE('',#389);
#392=ORIENTED_EDGE('',*,*,#391,.F.);
#394=ORIENTED_EDGE('',*,*,#393,.F.);
#396=ORIENTED_EDGE('',*,*,#395,.F.);
#398=ORIENTED_EDGE('',*,*,#397,.F.);
#400=ORIENTED_EDGE('',*,*,#399,.F.);
#401=EDGE_LOOP('',(#392,#394,#396,#398,#400));
#402=FACE_OUTER_BOUND('',#401,.F.);
#404=ORIENTED_EDGE('',*,*,#403,.T.);
#406=ORIENTED_EDGE('',*,*,#405,.T.);
#407=EDGE_LOOP('',(#404,#406));
#408=FACE_BOUND('',#407,.F.);
#409=ORIENTED_EDGE('',*,*,#366,.T.);
#410=ORIENTED_EDGE('',*,*,#380,.T.);
#411=EDGE_LOOP('',(#409,#410));
#412=FACE_BOUND('',#411,.F.);
#414=CARTESIAN_POINT('',(-3.25E1,0.E0,7.5E0));
#415=DIRECTION('',(0.E0,1.E0,0.E0));
#416=DIRECTION('',(1.E0,0.E0,0.E0));
#417=AXIS2_PLACEMENT_3D('',#414,#415,#416);
#418=CYLINDRICAL_SURFACE('',#417,1.E0);
#419=ORIENTED_EDGE('',*,*,#345,.T.);
#421=ORIENTED_EDGE('',*,*,#420,.T.);
#422=ORIENTED_EDGE('',*,*,#403,.F.);
#424=ORIENTED_EDGE('',*,*,#423,.F.);
#425=EDGE_LOOP('',(#419,#421,#422,#424));
#426=FACE_OUTER_BOUND('',#425,.F.);
#428=CARTESIAN_POINT('',(-3.25E1,0.E0,7.5E0));
#429=DIRECTION('',(0.E0,1.E0,0.E0));
#430=DIRECTION('',(1.E0,0.E0,0.E0));
#431=AXIS2_PLACEMENT_3D('',#428,#429,#430);
#432=CYLINDRICAL_SURFACE('',#431,1.E0);
#433=ORIENTED_EDGE('',*,*,#347,.T.);
#434=ORIENTED_EDGE('',*,*,#423,.T.);
#435=ORIENTED_EDGE('',*,*,#405,.F.);
#436=ORIENTED_EDGE('',*,*,#420,.F.);
#437=EDGE_LOOP('',(#433,#434,#435,#436));
#438=FACE_OUTER_BOUND('',#437,.F.);
#440=CARTESIAN_POINT('',(-3.5E1,1.5E-1,-1.E1));
#441=DIRECTION('',(-7.071067811865E-1,0.E0,-7.071067811865E-1));
#442=DIRECTION('',(7.071067811865E-1,0.E0,-7.071067811865E-1));
#443=AXIS2_PLACEMENT_3D('',#440,#441,#442);
#444=PLANE('',#443);
#445=ORIENTED_EDGE('',*,*,#333,.T.);
#447=ORIENTED_EDGE('',*,*,#446,.F.);
#448=ORIENTED_EDGE('',*,*,#391,.T.);
#450=ORIENTED_EDGE('',*,*,#449,.T.);
#451=EDGE_LOOP('',(#445,#447,#448,#450));
#452=FACE_OUTER_BOUND('',#451,.F.);
#454=CARTESIAN_POINT('',(3.75E1,0.E0,-1.25E1));
#455=DIRECTION('',(0.E0,0.E0,-1.E0));
#456=DIRECTION('',(-1.E0,0.E0,0.E0));
#457=AXIS2_PLACEMENT_3D('',#454,#455,#456);
#458=PLANE('',#457);
#459=ORIENTED_EDGE('',*,*,#446,.T.);
#460=ORIENTED_EDGE('',*,*,#341,.F.);
#462=ORIENTED_EDGE('',*,*,#461,.T.);
#463=ORIENTED_EDGE('',*,*,#393,.T.);
#464=EDGE_LOOP('',(#459,#460,#462,#463));
#465=FACE_OUTER_BOUND('',#464,.F.);
#467=CARTESIAN_POINT('',(3.75E1,0.E0,1.25E1));
#468=DIRECTION('',(1.E0,0.E0,0.E0));
#469=DIRECTION('',(0.E0,0.E0,-1.E0));
#470=AXIS2_PLACEMENT_3D('',#467,#468,#469);
#471=PLANE('',#470);
#472=ORIENTED_EDGE('',*,*,#339,.F.);
#474=ORIENTED_EDGE('',*,*,#473,.T.);
#475=ORIENTED_EDGE('',*,*,#395,.T.);
#476=ORIENTED_EDGE('',*,*,#461,.F.);
#477=EDGE_LOOP('',(#472,#474,#475,#476));
#478=FACE_OUTER_BOUND('',#477,.F.);
#480=CARTESIAN_POINT('',(-3.75E1,0.E0,1.25E1));
#481=DIRECTION('',(0.E0,0.E0,1.E0));
#482=DIRECTION('',(1.E0,0.E0,0.E0));
#483=AXIS2_PLACEMENT_3D('',#480,#481,#482);
#484=PLANE('',#483);
#485=ORIENTED_EDGE('',*,*,#337,.F.);
#487=ORIENTED_EDGE('',*,*,#486,.T.);
#488=ORIENTED_EDGE('',*,*,#397,.T.);
#489=ORIENTED_EDGE('',*,*,#473,.F.);
#490=EDGE_LOOP('',(#485,#487,#488,#489));
#491=FACE_OUTER_BOUND('',#490,.F.);
#493=CARTESIAN_POINT('',(-3.75E1,0.E0,-1.25E1));
#494=DIRECTION('',(-1.E0,0.E0,0.E0));
#495=DIRECTION('',(0.E0,0.E0,1.E0));
#496=AXIS2_PLACEMENT_3D('',#493,#494,#495);
#497=PLANE('',#496);
#498=ORIENTED_EDGE('',*,*,#449,.F.);
#499=ORIENTED_EDGE('',*,*,#399,.T.);
#500=ORIENTED_EDGE('',*,*,#486,.F.);
#501=ORIENTED_EDGE('',*,*,#335,.F.);
#502=EDGE_LOOP('',(#498,#499,#500,#501));
#503=FACE_OUTER_BOUND('',#502,.F.);
#505=CLOSED_SHELL('',(#357,#372,#385,#413,#427,#439,#453,#466,#479,#492,#504));
#506=MANIFOLD_SOLID_BREP('',#505);
#507=FILL_AREA_STYLE_COLOUR('',#67);
#508=FILL_AREA_STYLE('',(#507));
#509=SURFACE_STYLE_FILL_AREA(#508);
#510=SURFACE_SIDE_STYLE('',(#509));
#511=SURFACE_STYLE_USAGE(.BOTH.,#510);
#512=PRESENTATION_STYLE_ASSIGNMENT((#511));
#93=STYLED_ITEM('',(#512),#506);
#513=PRESENTATION_LAYER_ASSIGNMENT('SOLIDE','',(#93));
#516=PLANE_ANGLE_MEASURE_WITH_UNIT(PLANE_ANGLE_MEASURE(1.745329251994E-2),#515);
#517=(CONVERSION_BASED_UNIT('DEGREE',#516)NAMED_UNIT(*)PLANE_ANGLE_UNIT());
#519=UNCERTAINTY_MEASURE_WITH_UNIT(LENGTH_MEASURE(7.905434841171E-3),#514,
'distance_accuracy_value',
'Maximum model space distance between geometric entities at asserted connectivities');
#522=MECHANICAL_DESIGN_GEOMETRIC_PRESENTATION_REPRESENTATION('',(#102,#110,#118,
#126,#133,#140,#147,#154,#161,#168,#175,#183,#191,#199,#207,#214,#221,#228,#235,
#242,#249,#256,#263,#270,#277,#284,#291,#93),#520);
#523=APPLICATION_CONTEXT('automotive_design');
#524=APPLICATION_PROTOCOL_DEFINITION('international standard',
'automotive_design',2001,#523);
#525=PRODUCT_DEFINITION_CONTEXT('part definition',#523,'design');
#526=PRODUCT_CONTEXT('',#523,'mechanical');
#527=PRODUCT('BCBBBV6_FOND','BCBBBV6_FOND','NOT SPECIFIED',(#526));
#528=PRODUCT_DEFINITION_FORMATION('5','LAST_VERSION',#527);
#536=DERIVED_UNIT_ELEMENT(#535,2.E0);
#537=DERIVED_UNIT((#536));
#538=MEASURE_REPRESENTATION_ITEM('surface area measure',AREA_MEASURE(
3.775324860914E3),#537);
#543=DERIVED_UNIT_ELEMENT(#542,3.E0);
#544=DERIVED_UNIT((#543));
#545=MEASURE_REPRESENTATION_ITEM('volume measure',VOLUME_MEASURE(
5.568650444078E2),#544);
#549=CARTESIAN_POINT('centre point',(2.413062219463E-1,1.5E-1,
7.295304384422E-2));
#554=DERIVED_UNIT_ELEMENT(#553,2.E0);
#555=DERIVED_UNIT((#554));
#556=MEASURE_REPRESENTATION_ITEM('surface area measure',AREA_MEASURE(
3.775324860914E3),#555);
#561=DERIVED_UNIT_ELEMENT(#560,3.E0);
#562=DERIVED_UNIT((#561));
#563=MEASURE_REPRESENTATION_ITEM('volume measure',VOLUME_MEASURE(
5.568650444078E2),#562);
#567=CARTESIAN_POINT('centre point',(2.413062219463E-1,1.5E-1,
7.295304384422E-2));
#572=PRODUCT_RELATED_PRODUCT_CATEGORY('part','',(#527));
#574=GENERAL_PROPERTY('','PTC_COMMON_NAME','user defined attribute');
#575=GENERAL_PROPERTY_ASSOCIATION('user defined attribute','',#574,#573);
#576=DESCRIPTIVE_REPRESENTATION_ITEM('PTC_COMMON_NAME','bcbbbv6_fond.prt');
#580=GENERAL_PROPERTY('','MATIERE','user defined attribute');
#581=GENERAL_PROPERTY_ASSOCIATION('user defined attribute','',#580,#579);
#582=DESCRIPTIVE_REPRESENTATION_ITEM('MATIERE','ACIER_A60');
#586=GENERAL_PROPERTY('','FOURNISSEUR','user defined attribute');
#587=GENERAL_PROPERTY_ASSOCIATION('user defined attribute','',#586,#585);
#588=DESCRIPTIVE_REPRESENTATION_ITEM('FOURNISSEUR','hepia');
#592=GENERAL_PROPERTY('','PRIX','user defined attribute');
#593=GENERAL_PROPERTY_ASSOCIATION('user defined attribute','',#592,#591);
#594=VALUE_REPRESENTATION_ITEM('PRIX',NUMERIC_MEASURE(0.E0));
#597=DESCRIPTIVE_REPRESENTATION_ITEM('attribute description','Real Number');
#602=GENERAL_PROPERTY('','MASSE','user defined attribute');
#603=GENERAL_PROPERTY_ASSOCIATION('user defined attribute','',#602,#601);
#604=VALUE_REPRESENTATION_ITEM('MASSE',NUMERIC_MEASURE(7.87E-3));
#607=DESCRIPTIVE_REPRESENTATION_ITEM('attribute description','Real Number');
#612=GENERAL_PROPERTY('','MASSE_KG','user defined attribute');
#613=GENERAL_PROPERTY_ASSOCIATION('user defined attribute','',#612,#611);
#614=VALUE_REPRESENTATION_ITEM('MASSE_KG',NUMERIC_MEASURE(0.E0));
#617=DESCRIPTIVE_REPRESENTATION_ITEM('attribute description','Real Number');
#622=GENERAL_PROPERTY('','PTC_MATERIAL_NAME','user defined attribute');
#623=GENERAL_PROPERTY_ASSOCIATION('user defined attribute','',#622,#621);
#624=DESCRIPTIVE_REPRESENTATION_ITEM('PTC_MATERIAL_NAME','ACIER_A60');
#628=GENERAL_PROPERTY('','CONCEPTEUR','user defined attribute');
#629=GENERAL_PROPERTY_ASSOCIATION('user defined attribute','',#628,#627);
#630=DESCRIPTIVE_REPRESENTATION_ITEM('CONCEPTEUR','');
#634=GENERAL_PROPERTY('','DESSIN','user defined attribute');
#635=GENERAL_PROPERTY_ASSOCIATION('user defined attribute','',#634,#633);
#636=DESCRIPTIVE_REPRESENTATION_ITEM('DESSIN','gm2-g1-00.00');
#640=GENERAL_PROPERTY('','MFG_WP_MATERIAL','user defined attribute');
#641=GENERAL_PROPERTY_ASSOCIATION('user defined attribute','',#640,#639);
#642=DESCRIPTIVE_REPRESENTATION_ITEM('MFG_WP_MATERIAL','ACIER_A60');
#1=COLOUR_RGB('',0.E0,0.E0,4.7E-1);
#2=COLOUR_RGB('',0.E0,0.E0,6.E-1);
#3=COLOUR_RGB('',0.E0,0.E0,8.E-1);
#4=DRAUGHTING_PRE_DEFINED_COLOUR('blue');
#5=COLOUR_RGB('',0.E0,2.E-1,1.E0);
#6=COLOUR_RGB('',0.E0,4.E-1,0.E0);
#7=COLOUR_RGB('',0.E0,4.E-1,4.E-1);
#8=COLOUR_RGB('',0.E0,4.E-1,1.E0);
#9=COLOUR_RGB('',0.E0,5.3E-1,5.3E-1);
#10=COLOUR_RGB('',0.E0,6.E-1,0.E0);
#11=COLOUR_RGB('',0.E0,6.E-1,1.E0);
#12=COLOUR_RGB('',0.E0,8.E-1,0.E0);
#13=COLOUR_RGB('',0.E0,8.E-1,8.E-1);
#14=COLOUR_RGB('',0.E0,8.E-1,1.E0);
#15=DRAUGHTING_PRE_DEFINED_COLOUR('green');
#16=COLOUR_RGB('',0.E0,1.E0,2.E-1);
#17=COLOUR_RGB('',0.E0,1.E0,4.E-1);
#18=COLOUR_RGB('',0.E0,1.E0,6.E-1);
#19=COLOUR_RGB('',0.E0,1.E0,8.E-1);
#20=DRAUGHTING_PRE_DEFINED_COLOUR('cyan');
#21=COLOUR_RGB('',2.E-1,1.E0,0.E0);
#22=COLOUR_RGB('',2.E-1,1.E0,2.E-1);
#23=COLOUR_RGB('',2.E-1,1.E0,1.E0);
#24=COLOUR_RGB('',2.7E-1,0.E0,4.E-1);
#25=COLOUR_RGB('',2.7E-1,2.7E-1,0.E0);
#26=COLOUR_RGB('',2.7E-1,2.7E-1,1.E0);
#27=COLOUR_RGB('',3.3E-1,0.E0,0.E0);
#28=COLOUR_RGB('',3.3E-1,0.E0,5.3E-1);
#29=COLOUR_RGB('',4.E-1,0.E0,4.E-1);
#30=COLOUR_RGB('',4.E-1,0.E0,6.7E-1);
#31=COLOUR_RGB('',4.E-1,1.3E-1,0.E0);
#32=COLOUR_RGB('',4.E-1,4.E-1,0.E0);
#33=COLOUR_RGB('',4.E-1,4.E-1,1.E0);
#34=COLOUR_RGB('',4.E-1,1.E0,0.E0);
#35=COLOUR_RGB('',4.E-1,1.E0,4.E-1);
#36=COLOUR_RGB('',4.E-1,1.E0,1.E0);
#37=COLOUR_RGB('',4.7E-1,0.E0,0.E0);
#38=COLOUR_RGB('',4.7E-1,0.E0,8.7E-1);
#39=COLOUR_RGB('',4.7E-1,2.E-1,7.E-2);
#40=COLOUR_RGB('',4.7E-1,4.7E-1,4.7E-1);
#41=COLOUR_RGB('',5.3E-1,2.7E-1,1.3E-1);
#42=COLOUR_RGB('',6.E-1,2.E-1,1.E0);
#43=COLOUR_RGB('',6.E-1,3.3E-1,2.E-1);
#44=COLOUR_RGB('',6.E-1,6.E-1,0.E0);
#45=COLOUR_RGB('',6.E-1,6.E-1,1.E0);
#46=COLOUR_RGB('',6.E-1,1.E0,6.E-1);
#47=COLOUR_RGB('',6.E-1,1.E0,1.E0);
#48=COLOUR_RGB('',6.35294E-1,6.86275E-1,7.4902E-1);
#49=COLOUR_RGB('',6.7E-1,0.E0,0.E0);
#50=COLOUR_RGB('',6.7E-1,0.E0,5.3E-1);
#51=COLOUR_RGB('',6.7E-1,4.E-1,2.7E-1);
#52=COLOUR_RGB('',6.7E-1,4.E-1,1.E0);
#53=COLOUR_RGB('',6.7E-1,1.E0,0.E0);
#54=COLOUR_RGB('',7.3E-1,2.7E-1,1.E0);
#55=COLOUR_RGB('',7.3E-1,4.E-1,0.E0);
#56=COLOUR_RGB('',7.3E-1,4.7E-1,3.3E-1);
#57=COLOUR_RGB('',7.3E-1,7.3E-1,7.3E-1);
#58=COLOUR_RGB('',8.E-1,0.E0,8.E-1);
#59=COLOUR_RGB('',8.E-1,5.3E-1,4.E-1);
#60=COLOUR_RGB('',8.E-1,6.E-1,1.E0);
#61=COLOUR_RGB('',8.E-1,8.E-1,0.E0);
#62=COLOUR_RGB('',8.E-1,8.E-1,1.E0);
#63=COLOUR_RGB('',8.E-1,1.E0,8.E-1);
#64=COLOUR_RGB('',8.E-1,1.E0,1.E0);
#65=COLOUR_RGB('',8.7E-1,0.E0,0.E0);
#66=COLOUR_RGB('',8.7E-1,6.E-1,4.7E-1);
#67=COLOUR_RGB('',8.784E-1,9.49E-1,1.E0);
#68=COLOUR_RGB('',9.3E-1,1.E0,1.E0);
#69=DRAUGHTING_PRE_DEFINED_COLOUR('red');
#70=COLOUR_RGB('',1.E0,0.E0,2.7E-1);
#71=COLOUR_RGB('',1.E0,0.E0,4.7E-1);
#72=DRAUGHTING_PRE_DEFINED_COLOUR('magenta');
#73=COLOUR_RGB('',1.E0,2.E-1,1.E0);
#74=COLOUR_RGB('',1.E0,2.7E-1,0.E0);
#75=COLOUR_RGB('',1.E0,2.7E-1,2.7E-1);
#76=COLOUR_RGB('',1.E0,4.E-1,1.E0);
#77=COLOUR_RGB('',1.E0,4.7E-1,0.E0);
#78=COLOUR_RGB('',1.E0,4.7E-1,5.3E-1);
#79=COLOUR_RGB('',1.E0,6.E-1,1.E0);
#80=COLOUR_RGB('',1.E0,6.7E-1,0.E0);
#81=COLOUR_RGB('',1.E0,6.7E-1,6.7E-1);
#82=COLOUR_RGB('',1.E0,7.3E-1,5.3E-1);
#83=COLOUR_RGB('',1.E0,8.E-1,8.E-1);
#84=COLOUR_RGB('',1.E0,8.E-1,1.E0);
#85=COLOUR_RGB('',1.E0,8.7E-1,0.E0);
#86=COLOUR_RGB('',1.E0,9.3E-1,9.3E-1);
#87=DRAUGHTING_PRE_DEFINED_COLOUR('yellow');
#88=COLOUR_RGB('',1.E0,1.E0,1.3E-1);
#89=COLOUR_RGB('',1.E0,1.E0,3.3E-1);
#90=COLOUR_RGB('',1.E0,1.E0,5.3E-1);
#91=COLOUR_RGB('',1.E0,1.E0,7.3E-1);
#92=DRAUGHTING_PRE_DEFINED_COLOUR('white');
#98=CIRCLE('',#97,1.E0);
#107=CIRCLE('',#106,1.E0);
#115=CIRCLE('',#114,1.E0);
#123=CIRCLE('',#122,1.E0);
#180=CIRCLE('',#179,1.E0);
#188=CIRCLE('',#187,1.E0);
#196=CIRCLE('',#195,1.E0);
#204=CIRCLE('',#203,1.E0);
#333=EDGE_CURVE('',#322,#323,#130,.T.);
#335=EDGE_CURVE('',#322,#294,#137,.T.);
#337=EDGE_CURVE('',#294,#295,#144,.T.);
#339=EDGE_CURVE('',#295,#297,#151,.T.);
#341=EDGE_CURVE('',#297,#323,#158,.T.);
#345=EDGE_CURVE('',#310,#311,#115,.T.);
#347=EDGE_CURVE('',#311,#310,#123,.T.);
#351=EDGE_CURVE('',#306,#307,#98,.T.);
#353=EDGE_CURVE('',#307,#306,#107,.T.);
#357=ADVANCED_FACE('',(#344,#350,#356),#332,.F.);
#364=EDGE_CURVE('',#307,#315,#172,.T.);
#366=EDGE_CURVE('',#314,#315,#180,.T.);
#368=EDGE_CURVE('',#306,#314,#165,.T.);
#372=ADVANCED_FACE('',(#371),#362,.F.);
#380=EDGE_CURVE('',#315,#314,#188,.T.);
#385=ADVANCED_FACE('',(#384),#377,.F.);
#391=EDGE_CURVE('',#325,#327,#211,.T.);
#393=EDGE_CURVE('',#303,#325,#218,.T.);
#395=EDGE_CURVE('',#301,#303,#225,.T.);
#397=EDGE_CURVE('',#300,#301,#232,.T.);
#399=EDGE_CURVE('',#327,#300,#239,.T.);
#403=EDGE_CURVE('',#318,#319,#196,.T.);
#405=EDGE_CURVE('',#319,#318,#204,.T.);
#413=ADVANCED_FACE('',(#402,#408,#412),#390,.T.);
#420=EDGE_CURVE('',#311,#319,#253,.T.);
#423=EDGE_CURVE('',#310,#318,#246,.T.);
#427=ADVANCED_FACE('',(#426),#418,.F.);
#439=ADVANCED_FACE('',(#438),#432,.F.);
#446=EDGE_CURVE('',#325,#323,#260,.T.);
#449=EDGE_CURVE('',#327,#322,#288,.T.);
#453=ADVANCED_FACE('',(#452),#444,.T.);
#461=EDGE_CURVE('',#297,#303,#267,.T.);
#466=ADVANCED_FACE('',(#465),#458,.T.);
#473=EDGE_CURVE('',#295,#301,#274,.T.);
#479=ADVANCED_FACE('',(#478),#471,.T.);
#486=EDGE_CURVE('',#294,#300,#281,.T.);
#492=ADVANCED_FACE('',(#491),#484,.T.);
#504=ADVANCED_FACE('',(#503),#497,.T.);
#514=(LENGTH_UNIT()NAMED_UNIT(*)SI_UNIT(.MILLI.,.METRE.));
#515=(NAMED_UNIT(*)PLANE_ANGLE_UNIT()SI_UNIT($,.RADIAN.));
#518=(NAMED_UNIT(*)SI_UNIT($,.STERADIAN.)SOLID_ANGLE_UNIT());
#520=(GEOMETRIC_REPRESENTATION_CONTEXT(3)GLOBAL_UNCERTAINTY_ASSIGNED_CONTEXT((
#519))GLOBAL_UNIT_ASSIGNED_CONTEXT((#514,#517,#518))REPRESENTATION_CONTEXT
('ID1','3'));
#521=ADVANCED_BREP_SHAPE_REPRESENTATION('',(#506),#520);
#529=PRODUCT_DEFINITION('part definition','',#528,#525);
#530=PRODUCT_DEFINITION_SHAPE('','SHAPE FOR BCBBBV6_FOND.',#529);
#531=SHAPE_ASPECT('','solid data associated with BCBBBV6_FOND',#530,.F.);
#532=PROPERTY_DEFINITION('',
'shape for solid data with which properties are associated',#531);
#533=SHAPE_REPRESENTATION('',(#506),#520);
#534=SHAPE_DEFINITION_REPRESENTATION(#532,#533);
#535=(LENGTH_UNIT()NAMED_UNIT(*)SI_UNIT(.MILLI.,.METRE.));
#539=PROPERTY_DEFINITION('geometric validation property','area of BCBBBV6_FOND',
#531);
#540=REPRESENTATION('surface area',(#538),#520);
#541=PROPERTY_DEFINITION_REPRESENTATION(#539,#540);
#542=(LENGTH_UNIT()NAMED_UNIT(*)SI_UNIT(.MILLI.,.METRE.));
#546=PROPERTY_DEFINITION('geometric validation property',
'volume of BCBBBV6_FOND',#531);
#547=REPRESENTATION('volume',(#545),#520);
#548=PROPERTY_DEFINITION_REPRESENTATION(#546,#547);
#550=PROPERTY_DEFINITION('geometric validation property',
'centroid of BCBBBV6_FOND',#531);
#551=REPRESENTATION('centroid',(#549),#520);
#552=PROPERTY_DEFINITION_REPRESENTATION(#550,#551);
#553=(LENGTH_UNIT()NAMED_UNIT(*)SI_UNIT(.MILLI.,.METRE.));
#557=PROPERTY_DEFINITION('geometric validation property','area of BCBBBV6_FOND',
#530);
#558=REPRESENTATION('surface area',(#556),#520);
#559=PROPERTY_DEFINITION_REPRESENTATION(#557,#558);
#560=(LENGTH_UNIT()NAMED_UNIT(*)SI_UNIT(.MILLI.,.METRE.));
#564=PROPERTY_DEFINITION('geometric validation property',
'volume of BCBBBV6_FOND',#530);
#565=REPRESENTATION('volume',(#563),#520);
#566=PROPERTY_DEFINITION_REPRESENTATION(#564,#565);
#568=PROPERTY_DEFINITION('geometric validation property',
'centroid of BCBBBV6_FOND',#530);
#569=REPRESENTATION('centroid',(#567),#520);
#570=PROPERTY_DEFINITION_REPRESENTATION(#568,#569);
#571=SHAPE_DEFINITION_REPRESENTATION(#530,#521);
#573=PROPERTY_DEFINITION('PTC_COMMON_NAME','user defined attribute',#529);
#577=REPRESENTATION('',(#576),#520);
#578=PROPERTY_DEFINITION_REPRESENTATION(#573,#577);
#579=PROPERTY_DEFINITION('MATIERE','user defined attribute',#529);
#583=REPRESENTATION('',(#582),#520);
#584=PROPERTY_DEFINITION_REPRESENTATION(#579,#583);
#585=PROPERTY_DEFINITION('FOURNISSEUR','user defined attribute',#529);
#589=REPRESENTATION('',(#588),#520);
#590=PROPERTY_DEFINITION_REPRESENTATION(#585,#589);
#591=PROPERTY_DEFINITION('PRIX','user defined attribute',#529);
#595=REPRESENTATION('',(#594),#520);
#596=PROPERTY_DEFINITION_REPRESENTATION(#591,#595);
#598=REPRESENTATION('',(#597),#520);
#599=PROPERTY_DEFINITION('attribute type designation','Real Number',#592);
#600=PROPERTY_DEFINITION_REPRESENTATION(#599,#598);
#601=PROPERTY_DEFINITION('MASSE','user defined attribute',#529);
#605=REPRESENTATION('',(#604),#520);
#606=PROPERTY_DEFINITION_REPRESENTATION(#601,#605);
#608=REPRESENTATION('',(#607),#520);
#609=PROPERTY_DEFINITION('attribute type designation','Real Number',#602);
#610=PROPERTY_DEFINITION_REPRESENTATION(#609,#608);
#611=PROPERTY_DEFINITION('MASSE_KG','user defined attribute',#529);
#615=REPRESENTATION('',(#614),#520);
#616=PROPERTY_DEFINITION_REPRESENTATION(#611,#615);
#618=REPRESENTATION('',(#617),#520);
#619=PROPERTY_DEFINITION('attribute type designation','Real Number',#612);
#620=PROPERTY_DEFINITION_REPRESENTATION(#619,#618);
#621=PROPERTY_DEFINITION('PTC_MATERIAL_NAME','user defined attribute',#529);
#625=REPRESENTATION('',(#624),#520);
#626=PROPERTY_DEFINITION_REPRESENTATION(#621,#625);
#627=PROPERTY_DEFINITION('CONCEPTEUR','user defined attribute',#529);
#631=REPRESENTATION('',(#630),#520);
#632=PROPERTY_DEFINITION_REPRESENTATION(#627,#631);
#633=PROPERTY_DEFINITION('DESSIN','user defined attribute',#529);
#637=REPRESENTATION('',(#636),#520);
#638=PROPERTY_DEFINITION_REPRESENTATION(#633,#637);
#639=PROPERTY_DEFINITION('MFG_WP_MATERIAL','user defined attribute',#529);
#643=REPRESENTATION('',(#642),#520);
#644=PROPERTY_DEFINITION_REPRESENTATION(#639,#643);
ENDSEC;
END-ISO-10303-21;
