# Supplementary material
Source: MDPI journal article supplement (https://www.mdpi.com/2076-3417/11/12/5584)
Supplement: s1 [file s1 › hepia_bbb_lower_channel.stp]

ISO-10303-21;
HEADER;
FILE_DESCRIPTION((''),'2;1');
FILE_NAME('BCBBBV6_CHAMBRE_INFERIEURE','2020-11-24T11:11:05',('loris.gomezbai'),
(''),'CREO PARAMETRIC BY PTC INC, 2016390',
'CREO PARAMETRIC BY PTC INC, 2016390','');
FILE_SCHEMA(('AUTOMOTIVE_DESIGN { 1 0 10303 214 1 1 1 1 }'));
ENDSEC;
DATA;
#94=CARTESIAN_POINT('',(3.25E1,0.E0,-7.5E0));
#95=DIRECTION('',(0.E0,1.E0,0.E0));
#96=DIRECTION('',(1.E0,0.E0,0.E0));
#97=AXIS2_PLACEMENT_3D('',#94,#95,#96);
#99=DRAUGHTING_PRE_DEFINED_CURVE_FONT('continuous');
#100=CURVE_STYLE('',#99,POSITIVE_LENGTH_MEASURE(2.E-2),#67);
#101=PRESENTATION_STYLE_ASSIGNMENT((#100));
#102=STYLED_ITEM('',(#101),#98);
#103=CARTESIAN_POINT('',(3.25E1,0.E0,-7.5E0));
#104=DIRECTION('',(0.E0,1.E0,0.E0));
#105=DIRECTION('',(-1.E0,0.E0,0.E0));
#106=AXIS2_PLACEMENT_3D('',#103,#104,#105);
#108=CURVE_STYLE('',#99,POSITIVE_LENGTH_MEASURE(2.E-2),#67);
#109=PRESENTATION_STYLE_ASSIGNMENT((#108));
#110=STYLED_ITEM('',(#109),#107);
#111=CARTESIAN_POINT('',(-3.25E1,0.E0,7.5E0));
#112=DIRECTION('',(0.E0,1.E0,0.E0));
#113=DIRECTION('',(1.E0,0.E0,0.E0));
#114=AXIS2_PLACEMENT_3D('',#111,#112,#113);
#116=CURVE_STYLE('',#99,POSITIVE_LENGTH_MEASURE(2.E-2),#67);
#117=PRESENTATION_STYLE_ASSIGNMENT((#116));
#118=STYLED_ITEM('',(#117),#115);
#119=CARTESIAN_POINT('',(-3.25E1,0.E0,7.5E0));
#120=DIRECTION('',(0.E0,1.E0,0.E0));
#121=DIRECTION('',(-1.E0,0.E0,0.E0));
#122=AXIS2_PLACEMENT_3D('',#119,#120,#121);
#124=CURVE_STYLE('',#99,POSITIVE_LENGTH_MEASURE(2.E-2),#67);
#125=PRESENTATION_STYLE_ASSIGNMENT((#124));
#126=STYLED_ITEM('',(#125),#123);
#127=CARTESIAN_POINT('',(-1.295343475419E1,0.E0,-7.5E0));
#128=DIRECTION('',(0.E0,-1.E0,0.E0));
#129=DIRECTION('',(0.E0,0.E0,1.E0));
#130=AXIS2_PLACEMENT_3D('',#127,#128,#129);
#132=CURVE_STYLE('',#99,POSITIVE_LENGTH_MEASURE(2.E-2),#67);
#133=PRESENTATION_STYLE_ASSIGNMENT((#132));
#134=STYLED_ITEM('',(#133),#131);
#135=DIRECTION('',(-1.E0,0.E0,0.E0));
#136=VECTOR('',#135,2.859710199595E1);
#137=CARTESIAN_POINT('',(1.564366724176E1,0.E0,-2.5E0));
#138=LINE('',#137,#136);
#139=CURVE_STYLE('',#99,POSITIVE_LENGTH_MEASURE(2.E-2),#67);
#140=PRESENTATION_STYLE_ASSIGNMENT((#139));
#141=STYLED_ITEM('',(#140),#138);
#142=DIRECTION('',(-4.784844832936E-1,0.E0,-8.780960079896E-1));
#143=VECTOR('',#142,7.192644393769E0);
#144=CARTESIAN_POINT('',(2.347571601798E1,0.E0,6.423409912589E0));
#145=LINE('',#144,#143);
#146=CURVE_STYLE('',#99,POSITIVE_LENGTH_MEASURE(2.E-2),#67);
#147=PRESENTATION_STYLE_ASSIGNMENT((#146));
#148=STYLED_ITEM('',(#147),#145);
#149=DIRECTION('',(5.295255359869E-1,0.E0,8.482939978202E-1));
#150=VECTOR('',#149,4.525624542635E0);
#151=CARTESIAN_POINT('',(1.719490474329E1,0.E0,4.852372320066E0));
#152=LINE('',#151,#150);
#153=CURVE_STYLE('',#99,POSITIVE_LENGTH_MEASURE(2.E-2),#67);
#154=PRESENTATION_STYLE_ASSIGNMENT((#153));
#155=STYLED_ITEM('',(#154),#152);
#156=CARTESIAN_POINT('',(1.295343475419E1,0.E0,7.5E0));
#157=DIRECTION('',(0.E0,-1.E0,0.E0));
#158=DIRECTION('',(0.E0,0.E0,-1.E0));
#159=AXIS2_PLACEMENT_3D('',#156,#157,#158);
#161=CURVE_STYLE('',#99,POSITIVE_LENGTH_MEASURE(2.E-2),#67);
#162=PRESENTATION_STYLE_ASSIGNMENT((#161));
#163=STYLED_ITEM('',(#162),#160);
#164=DIRECTION('',(1.E0,0.E0,0.E0));
#165=VECTOR('',#164,2.859710199595E1);
#166=CARTESIAN_POINT('',(-1.564366724176E1,0.E0,2.5E0));
#167=LINE('',#166,#165);
#168=CURVE_STYLE('',#99,POSITIVE_LENGTH_MEASURE(2.E-2),#67);
#169=PRESENTATION_STYLE_ASSIGNMENT((#168));
#170=STYLED_ITEM('',(#169),#167);
#171=DIRECTION('',(4.784844832936E-1,0.E0,8.780960079896E-1));
#172=VECTOR('',#171,7.192644393769E0);
#173=CARTESIAN_POINT('',(-2.347571601798E1,0.E0,-6.423409912589E0));
#174=LINE('',#173,#172);
#175=CURVE_STYLE('',#99,POSITIVE_LENGTH_MEASURE(2.E-2),#67);
#176=PRESENTATION_STYLE_ASSIGNMENT((#175));
#177=STYLED_ITEM('',(#176),#174);
#178=DIRECTION('',(-5.295255359869E-1,0.E0,-8.482939978202E-1));
#179=VECTOR('',#178,4.525624542635E0);
#180=CARTESIAN_POINT('',(-1.719490474329E1,0.E0,-4.852372320066E0));
#181=LINE('',#180,#179);
#182=CURVE_STYLE('',#99,POSITIVE_LENGTH_MEASURE(2.E-2),#67);
#183=PRESENTATION_STYLE_ASSIGNMENT((#182));
#184=STYLED_ITEM('',(#183),#181);
#185=DIRECTION('',(7.071067811865E-1,0.E0,-7.071067811865E-1));
#186=VECTOR('',#185,7.071067811865E0);
#187=CARTESIAN_POINT('',(-3.75E1,0.E0,-7.5E0));
#188=LINE('',#187,#186);
#189=CURVE_STYLE('',#99,POSITIVE_LENGTH_MEASURE(2.E-2),#67);
#190=PRESENTATION_STYLE_ASSIGNMENT((#189));
#191=STYLED_ITEM('',(#190),#188);
#192=DIRECTION('',(0.E0,0.E0,1.E0));
#193=VECTOR('',#192,2.E1);
#194=CARTESIAN_POINT('',(-3.75E1,0.E0,-7.5E0));
#195=LINE('',#194,#193);
#196=CURVE_STYLE('',#99,POSITIVE_LENGTH_MEASURE(2.E-2),#67);
#197=PRESENTATION_STYLE_ASSIGNMENT((#196));
#198=STYLED_ITEM('',(#197),#195);
#199=DIRECTION('',(1.E0,0.E0,0.E0));
#200=VECTOR('',#199,7.5E1);
#201=CARTESIAN_POINT('',(-3.75E1,0.E0,1.25E1));
#202=LINE('',#201,#200);
#203=CURVE_STYLE('',#99,POSITIVE_LENGTH_MEASURE(2.E-2),#67);
#204=PRESENTATION_STYLE_ASSIGNMENT((#203));
#205=STYLED_ITEM('',(#204),#202);
#206=DIRECTION('',(0.E0,0.E0,-1.E0));
#207=VECTOR('',#206,2.5E1);
#208=CARTESIAN_POINT('',(3.75E1,0.E0,1.25E1));
#209=LINE('',#208,#207);
#210=CURVE_STYLE('',#99,POSITIVE_LENGTH_MEASURE(2.E-2),#67);
#211=PRESENTATION_STYLE_ASSIGNMENT((#210));
#212=STYLED_ITEM('',(#211),#209);
#213=DIRECTION('',(-1.E0,0.E0,0.E0));
#214=VECTOR('',#213,7.E1);
#215=CARTESIAN_POINT('',(3.75E1,0.E0,-1.25E1));
#216=LINE('',#215,#214);
#217=CURVE_STYLE('',#99,POSITIVE_LENGTH_MEASURE(2.E-2),#67);
#218=PRESENTATION_STYLE_ASSIGNMENT((#217));
#219=STYLED_ITEM('',(#218),#216);
#220=DIRECTION('',(0.E0,1.E0,0.E0));
#221=VECTOR('',#220,3.E-1);
#222=CARTESIAN_POINT('',(3.35E1,0.E0,-7.5E0));
#223=LINE('',#222,#221);
#224=CURVE_STYLE('',#99,POSITIVE_LENGTH_MEASURE(2.E-2),#67);
#225=PRESENTATION_STYLE_ASSIGNMENT((#224));
#226=STYLED_ITEM('',(#225),#223);
#227=DIRECTION('',(0.E0,1.E0,0.E0));
#228=VECTOR('',#227,3.E-1);
#229=CARTESIAN_POINT('',(3.15E1,0.E0,-7.5E0));
#230=LINE('',#229,#228);
#231=CURVE_STYLE('',#99,POSITIVE_LENGTH_MEASURE(2.E-2),#67);
#232=PRESENTATION_STYLE_ASSIGNMENT((#231));
#233=STYLED_ITEM('',(#232),#230);
#234=CARTESIAN_POINT('',(3.25E1,3.E-1,-7.5E0));
#235=DIRECTION('',(0.E0,1.E0,0.E0));
#236=DIRECTION('',(1.E0,0.E0,0.E0));
#237=AXIS2_PLACEMENT_3D('',#234,#235,#236);
#239=CURVE_STYLE('',#99,POSITIVE_LENGTH_MEASURE(2.E-2),#67);
#240=PRESENTATION_STYLE_ASSIGNMENT((#239));
#241=STYLED_ITEM('',(#240),#238);
#242=CARTESIAN_POINT('',(3.25E1,3.E-1,-7.5E0));
#243=DIRECTION('',(0.E0,1.E0,0.E0));
#244=DIRECTION('',(-1.E0,0.E0,0.E0));
#245=AXIS2_PLACEMENT_3D('',#242,#243,#244);
#247=CURVE_STYLE('',#99,POSITIVE_LENGTH_MEASURE(2.E-2),#67);
#248=PRESENTATION_STYLE_ASSIGNMENT((#247));
#249=STYLED_ITEM('',(#248),#246);
#250=CARTESIAN_POINT('',(-3.25E1,3.E-1,7.5E0));
#251=DIRECTION('',(0.E0,1.E0,0.E0));
#252=DIRECTION('',(1.E0,0.E0,0.E0));
#253=AXIS2_PLACEMENT_3D('',#250,#251,#252);
#255=CURVE_STYLE('',#99,POSITIVE_LENGTH_MEASURE(2.E-2),#67);
#256=PRESENTATION_STYLE_ASSIGNMENT((#255));
#257=STYLED_ITEM('',(#256),#254);
#258=CARTESIAN_POINT('',(-3.25E1,3.E-1,7.5E0));
#259=DIRECTION('',(0.E0,1.E0,0.E0));
#260=DIRECTION('',(-1.E0,0.E0,0.E0));
#261=AXIS2_PLACEMENT_3D('',#258,#259,#260);
#263=CURVE_STYLE('',#99,POSITIVE_LENGTH_MEASURE(2.E-2),#67);
#264=PRESENTATION_STYLE_ASSIGNMENT((#263));
#265=STYLED_ITEM('',(#264),#262);
#266=CARTESIAN_POINT('',(-1.295343475419E1,3.E-1,-7.5E0));
#267=DIRECTION('',(0.E0,1.E0,0.E0));
#268=DIRECTION('',(-8.482939978202E-1,0.E0,5.295255359869E-1));
#269=AXIS2_PLACEMENT_3D('',#266,#267,#268);
#271=CURVE_STYLE('',#99,POSITIVE_LENGTH_MEASURE(2.E-2),#67);
#272=PRESENTATION_STYLE_ASSIGNMENT((#271));
#273=STYLED_ITEM('',(#272),#270);
#274=DIRECTION('',(-5.295255359869E-1,0.E0,-8.482939978202E-1));
#275=VECTOR('',#274,4.525624542635E0);
#276=CARTESIAN_POINT('',(-1.719490474329E1,3.E-1,-4.852372320066E0));
#277=LINE('',#276,#275);
#278=CURVE_STYLE('',#99,POSITIVE_LENGTH_MEASURE(2.E-2),#67);
#279=PRESENTATION_STYLE_ASSIGNMENT((#278));
#280=STYLED_ITEM('',(#279),#277);
#281=DIRECTION('',(4.784844832936E-1,0.E0,8.780960079896E-1));
#282=VECTOR('',#281,7.192644393769E0);
#283=CARTESIAN_POINT('',(-2.347571601798E1,3.E-1,-6.423409912589E0));
#284=LINE('',#283,#282);
#285=CURVE_STYLE('',#99,POSITIVE_LENGTH_MEASURE(2.E-2),#67);
#286=PRESENTATION_STYLE_ASSIGNMENT((#285));
#287=STYLED_ITEM('',(#286),#284);
#288=DIRECTION('',(1.E0,0.E0,0.E0));
#289=VECTOR('',#288,2.859710199595E1);
#290=CARTESIAN_POINT('',(-1.564366724176E1,3.E-1,2.5E0));
#291=LINE('',#290,#289);
#292=CURVE_STYLE('',#99,POSITIVE_LENGTH_MEASURE(2.E-2),#67);
#293=PRESENTATION_STYLE_ASSIGNMENT((#292));
#294=STYLED_ITEM('',(#293),#291);
#295=CARTESIAN_POINT('',(1.295343475419E1,3.E-1,7.5E0));
#296=DIRECTION('',(0.E0,1.E0,0.E0));
#297=DIRECTION('',(8.482939978202E-1,0.E0,-5.295255359869E-1));
#298=AXIS2_PLACEMENT_3D('',#295,#296,#297);
#300=CURVE_STYLE('',#99,POSITIVE_LENGTH_MEASURE(2.E-2),#67);
#301=PRESENTATION_STYLE_ASSIGNMENT((#300));
#302=STYLED_ITEM('',(#301),#299);
#303=DIRECTION('',(5.295255359869E-1,0.E0,8.482939978202E-1));
#304=VECTOR('',#303,4.525624542635E0);
#305=CARTESIAN_POINT('',(1.719490474329E1,3.E-1,4.852372320066E0));
#306=LINE('',#305,#304);
#307=CURVE_STYLE('',#99,POSITIVE_LENGTH_MEASURE(2.E-2),#67);
#308=PRESENTATION_STYLE_ASSIGNMENT((#307));
#309=STYLED_ITEM('',(#308),#306);
#310=DIRECTION('',(-4.784844832936E-1,0.E0,-8.780960079896E-1));
#311=VECTOR('',#310,7.192644393769E0);
#312=CARTESIAN_POINT('',(2.347571601798E1,3.E-1,6.423409912589E0));
#313=LINE('',#312,#311);
#314=CURVE_STYLE('',#99,POSITIVE_LENGTH_MEASURE(2.E-2),#67);
#315=PRESENTATION_STYLE_ASSIGNMENT((#314));
#316=STYLED_ITEM('',(#315),#313);
#317=DIRECTION('',(-1.E0,0.E0,0.E0));
#318=VECTOR('',#317,2.859710199595E1);
#319=CARTESIAN_POINT('',(1.564366724176E1,3.E-1,-2.5E0));
#320=LINE('',#319,#318);
#321=CURVE_STYLE('',#99,POSITIVE_LENGTH_MEASURE(2.E-2),#67);
#322=PRESENTATION_STYLE_ASSIGNMENT((#321));
#323=STYLED_ITEM('',(#322),#320);
#324=DIRECTION('',(-7.071067811865E-1,0.E0,7.071067811865E-1));
#325=VECTOR('',#324,7.071067811865E0);
#326=CARTESIAN_POINT('',(-3.25E1,3.E-1,-1.25E1));
#327=LINE('',#326,#325);
#328=CURVE_STYLE('',#99,POSITIVE_LENGTH_MEASURE(2.E-2),#67);
#329=PRESENTATION_STYLE_ASSIGNMENT((#328));
#330=STYLED_ITEM('',(#329),#327);
#331=DIRECTION('',(-1.E0,0.E0,0.E0));
#332=VECTOR('',#331,7.E1);
#333=CARTESIAN_POINT('',(3.75E1,3.E-1,-1.25E1));
#334=LINE('',#333,#332);
#335=CURVE_STYLE('',#99,POSITIVE_LENGTH_MEASURE(2.E-2),#67);
#336=PRESENTATION_STYLE_ASSIGNMENT((#335));
#337=STYLED_ITEM('',(#336),#334);
#338=DIRECTION('',(0.E0,0.E0,-1.E0));
#339=VECTOR('',#338,2.5E1);
#340=CARTESIAN_POINT('',(3.75E1,3.E-1,1.25E1));
#341=LINE('',#340,#339);
#342=CURVE_STYLE('',#99,POSITIVE_LENGTH_MEASURE(2.E-2),#67);
#343=PRESENTATION_STYLE_ASSIGNMENT((#342));
#344=STYLED_ITEM('',(#343),#341);
#345=DIRECTION('',(1.E0,0.E0,0.E0));
#346=VECTOR('',#345,7.5E1);
#347=CARTESIAN_POINT('',(-3.75E1,3.E-1,1.25E1));
#348=LINE('',#347,#346);
#349=CURVE_STYLE('',#99,POSITIVE_LENGTH_MEASURE(2.E-2),#67);
#350=PRESENTATION_STYLE_ASSIGNMENT((#349));
#351=STYLED_ITEM('',(#350),#348);
#352=DIRECTION('',(0.E0,0.E0,1.E0));
#353=VECTOR('',#352,2.E1);
#354=CARTESIAN_POINT('',(-3.75E1,3.E-1,-7.5E0));
#355=LINE('',#354,#353);
#356=CURVE_STYLE('',#99,POSITIVE_LENGTH_MEASURE(2.E-2),#67);
#357=PRESENTATION_STYLE_ASSIGNMENT((#356));
#358=STYLED_ITEM('',(#357),#355);
#359=DIRECTION('',(0.E0,1.E0,0.E0));
#360=VECTOR('',#359,3.E-1);
#361=CARTESIAN_POINT('',(-3.15E1,0.E0,7.5E0));
#362=LINE('',#361,#360);
#363=CURVE_STYLE('',#99,POSITIVE_LENGTH_MEASURE(2.E-2),#67);
#364=PRESENTATION_STYLE_ASSIGNMENT((#363));
#365=STYLED_ITEM('',(#364),#362);
#366=DIRECTION('',(0.E0,1.E0,0.E0));
#367=VECTOR('',#366,3.E-1);
#368=CARTESIAN_POINT('',(-3.35E1,0.E0,7.5E0));
#369=LINE('',#368,#367);
#370=CURVE_STYLE('',#99,POSITIVE_LENGTH_MEASURE(2.E-2),#67);
#371=PRESENTATION_STYLE_ASSIGNMENT((#370));
#372=STYLED_ITEM('',(#371),#369);
#373=DIRECTION('',(0.E0,1.E0,0.E0));
#374=VECTOR('',#373,3.E-1);
#375=CARTESIAN_POINT('',(-1.295343475419E1,0.E0,-2.5E0));
#376=LINE('',#375,#374);
#377=CURVE_STYLE('',#99,POSITIVE_LENGTH_MEASURE(2.E-2),#67);
#378=PRESENTATION_STYLE_ASSIGNMENT((#377));
#379=STYLED_ITEM('',(#378),#376);
#380=DIRECTION('',(0.E0,-1.E0,0.E0));
#381=VECTOR('',#380,3.E-1);
#382=CARTESIAN_POINT('',(1.564366724176E1,3.E-1,-2.5E0));
#383=LINE('',#382,#381);
#384=CURVE_STYLE('',#99,POSITIVE_LENGTH_MEASURE(2.E-2),#67);
#385=PRESENTATION_STYLE_ASSIGNMENT((#384));
#386=STYLED_ITEM('',(#385),#383);
#387=CARTESIAN_POINT('',(1.564366724176E1,3.E-1,2.5E0));
#388=DIRECTION('',(0.E0,-1.E0,0.E0));
#389=DIRECTION('',(0.E0,0.E0,-1.E0));
#390=AXIS2_PLACEMENT_3D('',#387,#388,#389);
#392=CURVE_STYLE('',#99,POSITIVE_LENGTH_MEASURE(2.E-2),#67);
#393=PRESENTATION_STYLE_ASSIGNMENT((#392));
#394=STYLED_ITEM('',(#393),#391);
#395=CARTESIAN_POINT('',(1.564366724176E1,0.E0,2.5E0));
#396=DIRECTION('',(0.E0,1.E0,0.E0));
#397=DIRECTION('',(8.780960079896E-1,0.E0,-4.784844832936E-1));
#398=AXIS2_PLACEMENT_3D('',#395,#396,#397);
#400=CURVE_STYLE('',#99,POSITIVE_LENGTH_MEASURE(2.E-2),#67);
#401=PRESENTATION_STYLE_ASSIGNMENT((#400));
#402=STYLED_ITEM('',(#401),#399);
#403=DIRECTION('',(0.E0,-1.E0,0.E0));
#404=VECTOR('',#403,3.E-1);
#405=CARTESIAN_POINT('',(2.003414728171E1,3.E-1,1.075775835322E-1));
#406=LINE('',#405,#404);
#407=CURVE_STYLE('',#99,POSITIVE_LENGTH_MEASURE(2.E-2),#67);
#408=PRESENTATION_STYLE_ASSIGNMENT((#407));
#409=STYLED_ITEM('',(#408),#406);
#410=CARTESIAN_POINT('',(2.15E1,3.E-1,7.5E0));
#411=DIRECTION('',(0.E0,-1.E0,0.E0));
#412=DIRECTION('',(8.780960079896E-1,0.E0,-4.784844832936E-1));
#413=AXIS2_PLACEMENT_3D('',#410,#411,#412);
#415=CURVE_STYLE('',#99,POSITIVE_LENGTH_MEASURE(2.E-2),#67);
#416=PRESENTATION_STYLE_ASSIGNMENT((#415));
#417=STYLED_ITEM('',(#416),#414);
#418=DIRECTION('',(0.E0,1.E0,0.E0));
#419=VECTOR('',#418,3.E-1);
#420=CARTESIAN_POINT('',(1.959133850490E1,0.E0,8.691432455970E0));
#421=LINE('',#420,#419);
#422=CURVE_STYLE('',#99,POSITIVE_LENGTH_MEASURE(2.E-2),#67);
#423=PRESENTATION_STYLE_ASSIGNMENT((#422));
#424=STYLED_ITEM('',(#423),#421);
#425=CARTESIAN_POINT('',(2.15E1,0.E0,7.5E0));
#426=DIRECTION('',(0.E0,1.E0,0.E0));
#427=DIRECTION('',(-8.482939978202E-1,0.E0,5.295255359869E-1));
#428=AXIS2_PLACEMENT_3D('',#425,#426,#427);
#430=CURVE_STYLE('',#99,POSITIVE_LENGTH_MEASURE(2.E-2),#67);
#431=PRESENTATION_STYLE_ASSIGNMENT((#430));
#432=STYLED_ITEM('',(#431),#429);
#433=DIRECTION('',(0.E0,1.E0,0.E0));
#434=VECTOR('',#433,3.E-1);
#435=CARTESIAN_POINT('',(2.347571601798E1,0.E0,6.423409912589E0));
#436=LINE('',#435,#434);
#437=CURVE_STYLE('',#99,POSITIVE_LENGTH_MEASURE(2.E-2),#67);
#438=PRESENTATION_STYLE_ASSIGNMENT((#437));
#439=STYLED_ITEM('',(#438),#436);
#440=DIRECTION('',(0.E0,1.E0,0.E0));
#441=VECTOR('',#440,3.E-1);
#442=CARTESIAN_POINT('',(1.719490474329E1,0.E0,4.852372320066E0));
#443=LINE('',#442,#441);
#444=CURVE_STYLE('',#99,POSITIVE_LENGTH_MEASURE(2.E-2),#67);
#445=PRESENTATION_STYLE_ASSIGNMENT((#444));
#446=STYLED_ITEM('',(#445),#443);
#447=DIRECTION('',(-1.184237892934E-14,1.E0,0.E0));
#448=VECTOR('',#447,3.E-1);
#449=CARTESIAN_POINT('',(1.295343475419E1,0.E0,2.5E0));
#450=LINE('',#449,#448);
#451=CURVE_STYLE('',#99,POSITIVE_LENGTH_MEASURE(2.E-2),#67);
#452=PRESENTATION_STYLE_ASSIGNMENT((#451));
#453=STYLED_ITEM('',(#452),#450);
#454=DIRECTION('',(0.E0,-1.E0,0.E0));
#455=VECTOR('',#454,3.E-1);
#456=CARTESIAN_POINT('',(-1.564366724176E1,3.E-1,2.5E0));
#457=LINE('',#456,#455);
#458=CURVE_STYLE('',#99,POSITIVE_LENGTH_MEASURE(2.E-2),#67);
#459=PRESENTATION_STYLE_ASSIGNMENT((#458));
#460=STYLED_ITEM('',(#459),#457);
#461=CARTESIAN_POINT('',(-1.564366724176E1,3.E-1,-2.5E0));
#462=DIRECTION('',(0.E0,-1.E0,0.E0));
#463=DIRECTION('',(0.E0,0.E0,1.E0));
#464=AXIS2_PLACEMENT_3D('',#461,#462,#463);
#466=CURVE_STYLE('',#99,POSITIVE_LENGTH_MEASURE(2.E-2),#67);
#467=PRESENTATION_STYLE_ASSIGNMENT((#466));
#468=STYLED_ITEM('',(#467),#465);
#469=CARTESIAN_POINT('',(-1.564366724176E1,0.E0,-2.5E0));
#470=DIRECTION('',(0.E0,1.E0,0.E0));
#471=DIRECTION('',(-8.780960079896E-1,0.E0,4.784844832936E-1));
#472=AXIS2_PLACEMENT_3D('',#469,#470,#471);
#474=CURVE_STYLE('',#99,POSITIVE_LENGTH_MEASURE(2.E-2),#67);
#475=PRESENTATION_STYLE_ASSIGNMENT((#474));
#476=STYLED_ITEM('',(#475),#473);
#477=DIRECTION('',(0.E0,-1.E0,0.E0));
#478=VECTOR('',#477,3.E-1);
#479=CARTESIAN_POINT('',(-2.003414728171E1,3.E-1,-1.075775835322E-1));
#480=LINE('',#479,#478);
#481=CURVE_STYLE('',#99,POSITIVE_LENGTH_MEASURE(2.E-2),#67);
#482=PRESENTATION_STYLE_ASSIGNMENT((#481));
#483=STYLED_ITEM('',(#482),#480);
#484=CARTESIAN_POINT('',(-2.15E1,0.E0,-7.5E0));
#485=DIRECTION('',(0.E0,1.E0,0.E0));
#486=DIRECTION('',(8.482939978202E-1,0.E0,-5.295255359869E-1));
#487=AXIS2_PLACEMENT_3D('',#484,#485,#486);
#489=CURVE_STYLE('',#99,POSITIVE_LENGTH_MEASURE(2.E-2),#67);
#490=PRESENTATION_STYLE_ASSIGNMENT((#489));
#491=STYLED_ITEM('',(#490),#488);
#492=DIRECTION('',(0.E0,1.E0,0.E0));
#493=VECTOR('',#492,3.E-1);
#494=CARTESIAN_POINT('',(-2.347571601798E1,0.E0,-6.423409912589E0));
#495=LINE('',#494,#493);
#496=CURVE_STYLE('',#99,POSITIVE_LENGTH_MEASURE(2.E-2),#67);
#497=PRESENTATION_STYLE_ASSIGNMENT((#496));
#498=STYLED_ITEM('',(#497),#495);
#499=CARTESIAN_POINT('',(-2.15E1,3.E-1,-7.5E0));
#500=DIRECTION('',(0.E0,-1.E0,0.E0));
#501=DIRECTION('',(-8.780960079896E-1,0.E0,4.784844832936E-1));
#502=AXIS2_PLACEMENT_3D('',#499,#500,#501);
#504=CURVE_STYLE('',#99,POSITIVE_LENGTH_MEASURE(2.E-2),#67);
#505=PRESENTATION_STYLE_ASSIGNMENT((#504));
#506=STYLED_ITEM('',(#505),#503);
#507=DIRECTION('',(0.E0,1.E0,0.E0));
#508=VECTOR('',#507,3.E-1);
#509=CARTESIAN_POINT('',(-1.959133850490E1,0.E0,-8.691432455970E0));
#510=LINE('',#509,#508);
#511=CURVE_STYLE('',#99,POSITIVE_LENGTH_MEASURE(2.E-2),#67);
#512=PRESENTATION_STYLE_ASSIGNMENT((#511));
#513=STYLED_ITEM('',(#512),#510);
#514=DIRECTION('',(0.E0,1.E0,0.E0));
#515=VECTOR('',#514,3.E-1);
#516=CARTESIAN_POINT('',(-1.719490474329E1,0.E0,-4.852372320066E0));
#517=LINE('',#516,#515);
#518=CURVE_STYLE('',#99,POSITIVE_LENGTH_MEASURE(2.E-2),#67);
#519=PRESENTATION_STYLE_ASSIGNMENT((#518));
#520=STYLED_ITEM('',(#519),#517);
#521=DIRECTION('',(0.E0,-1.E0,0.E0));
#522=VECTOR('',#521,3.E-1);
#523=CARTESIAN_POINT('',(-3.25E1,3.E-1,-1.25E1));
#524=LINE('',#523,#522);
#525=CURVE_STYLE('',#99,POSITIVE_LENGTH_MEASURE(2.E-2),#67);
#526=PRESENTATION_STYLE_ASSIGNMENT((#525));
#527=STYLED_ITEM('',(#526),#524);
#528=DIRECTION('',(0.E0,1.E0,0.E0));
#529=VECTOR('',#528,3.E-1);
#530=CARTESIAN_POINT('',(3.75E1,0.E0,-1.25E1));
#531=LINE('',#530,#529);
#532=CURVE_STYLE('',#99,POSITIVE_LENGTH_MEASURE(2.E-2),#67);
#533=PRESENTATION_STYLE_ASSIGNMENT((#532));
#534=STYLED_ITEM('',(#533),#531);
#535=DIRECTION('',(0.E0,1.E0,0.E0));
#536=VECTOR('',#535,3.E-1);
#537=CARTESIAN_POINT('',(3.75E1,0.E0,1.25E1));
#538=LINE('',#537,#536);
#539=CURVE_STYLE('',#99,POSITIVE_LENGTH_MEASURE(2.E-2),#67);
#540=PRESENTATION_STYLE_ASSIGNMENT((#539));
#541=STYLED_ITEM('',(#540),#538);
#542=DIRECTION('',(0.E0,1.E0,0.E0));
#543=VECTOR('',#542,3.E-1);
#544=CARTESIAN_POINT('',(-3.75E1,0.E0,1.25E1));
#545=LINE('',#544,#543);
#546=CURVE_STYLE('',#99,POSITIVE_LENGTH_MEASURE(2.E-2),#67);
#547=PRESENTATION_STYLE_ASSIGNMENT((#546));
#548=STYLED_ITEM('',(#547),#545);
#549=DIRECTION('',(0.E0,-1.E0,0.E0));
#550=VECTOR('',#549,3.E-1);
#551=CARTESIAN_POINT('',(-3.75E1,3.E-1,-7.5E0));
#552=LINE('',#551,#550);
#553=CURVE_STYLE('',#99,POSITIVE_LENGTH_MEASURE(2.E-2),#67);
#554=PRESENTATION_STYLE_ASSIGNMENT((#553));
#555=STYLED_ITEM('',(#554),#552);
#556=CARTESIAN_POINT('',(-3.75E1,0.E0,1.25E1));
#557=CARTESIAN_POINT('',(3.75E1,0.E0,1.25E1));
#558=VERTEX_POINT('',#556);
#559=VERTEX_POINT('',#557);
#560=CARTESIAN_POINT('',(3.75E1,0.E0,-1.25E1));
#561=VERTEX_POINT('',#560);
#562=CARTESIAN_POINT('',(-3.75E1,3.E-1,1.25E1));
#563=CARTESIAN_POINT('',(3.75E1,3.E-1,1.25E1));
#564=VERTEX_POINT('',#562);
#565=VERTEX_POINT('',#563);
#566=CARTESIAN_POINT('',(3.75E1,3.E-1,-1.25E1));
#567=VERTEX_POINT('',#566);
#568=CARTESIAN_POINT('',(3.35E1,0.E0,-7.5E0));
#569=CARTESIAN_POINT('',(3.15E1,0.E0,-7.5E0));
#570=VERTEX_POINT('',#568);
#571=VERTEX_POINT('',#569);
#572=CARTESIAN_POINT('',(-3.15E1,0.E0,7.5E0));
#573=CARTESIAN_POINT('',(-3.35E1,0.E0,7.5E0));
#574=VERTEX_POINT('',#572);
#575=VERTEX_POINT('',#573);
#576=CARTESIAN_POINT('',(3.35E1,3.E-1,-7.5E0));
#577=CARTESIAN_POINT('',(3.15E1,3.E-1,-7.5E0));
#578=VERTEX_POINT('',#576);
#579=VERTEX_POINT('',#577);
#580=CARTESIAN_POINT('',(-3.15E1,3.E-1,7.5E0));
#581=CARTESIAN_POINT('',(-3.35E1,3.E-1,7.5E0));
#582=VERTEX_POINT('',#580);
#583=VERTEX_POINT('',#581);
#584=CARTESIAN_POINT('',(-3.75E1,0.E0,-7.5E0));
#585=CARTESIAN_POINT('',(-3.25E1,0.E0,-1.25E1));
#586=VERTEX_POINT('',#584);
#587=VERTEX_POINT('',#585);
#588=CARTESIAN_POINT('',(-3.25E1,3.E-1,-1.25E1));
#589=VERTEX_POINT('',#588);
#590=CARTESIAN_POINT('',(-3.75E1,3.E-1,-7.5E0));
#591=VERTEX_POINT('',#590);
#592=CARTESIAN_POINT('',(-1.959133850490E1,0.E0,-8.691432455970E0));
#593=CARTESIAN_POINT('',(-1.959133850490E1,3.E-1,-8.691432455970E0));
#594=VERTEX_POINT('',#592);
#595=VERTEX_POINT('',#593);
#596=CARTESIAN_POINT('',(-2.347571601798E1,0.E0,-6.423409912589E0));
#597=CARTESIAN_POINT('',(-2.347571601798E1,3.E-1,-6.423409912589E0));
#598=VERTEX_POINT('',#596);
#599=VERTEX_POINT('',#597);
#600=CARTESIAN_POINT('',(2.347571601798E1,0.E0,6.423409912589E0));
#601=CARTESIAN_POINT('',(2.347571601798E1,3.E-1,6.423409912589E0));
#602=VERTEX_POINT('',#600);
#603=VERTEX_POINT('',#601);
#604=CARTESIAN_POINT('',(1.959133850490E1,0.E0,8.691432455970E0));
#605=CARTESIAN_POINT('',(1.959133850490E1,3.E-1,8.691432455970E0));
#606=VERTEX_POINT('',#604);
#607=VERTEX_POINT('',#605);
#608=CARTESIAN_POINT('',(-1.564366724176E1,3.E-1,2.5E0));
#609=CARTESIAN_POINT('',(-1.564366724176E1,0.E0,2.5E0));
#610=VERTEX_POINT('',#608);
#611=VERTEX_POINT('',#609);
#612=CARTESIAN_POINT('',(-2.003414728171E1,3.E-1,-1.075775835322E-1));
#613=CARTESIAN_POINT('',(-2.003414728171E1,0.E0,-1.075775835322E-1));
#614=VERTEX_POINT('',#612);
#615=VERTEX_POINT('',#613);
#616=CARTESIAN_POINT('',(1.564366724176E1,3.E-1,-2.5E0));
#617=CARTESIAN_POINT('',(1.564366724176E1,0.E0,-2.5E0));
#618=VERTEX_POINT('',#616);
#619=VERTEX_POINT('',#617);
#620=CARTESIAN_POINT('',(2.003414728171E1,3.E-1,1.075775835322E-1));
#621=CARTESIAN_POINT('',(2.003414728171E1,0.E0,1.075775835322E-1));
#622=VERTEX_POINT('',#620);
#623=VERTEX_POINT('',#621);
#624=CARTESIAN_POINT('',(-1.719490474329E1,3.E-1,-4.852372320066E0));
#625=CARTESIAN_POINT('',(-1.295343475419E1,3.E-1,-2.5E0));
#626=VERTEX_POINT('',#624);
#627=VERTEX_POINT('',#625);
#628=CARTESIAN_POINT('',(-1.295343475419E1,0.E0,-2.5E0));
#629=VERTEX_POINT('',#628);
#630=CARTESIAN_POINT('',(-1.719490474329E1,0.E0,-4.852372320066E0));
#631=VERTEX_POINT('',#630);
#632=CARTESIAN_POINT('',(1.719490474329E1,3.E-1,4.852372320066E0));
#633=CARTESIAN_POINT('',(1.295343475419E1,3.E-1,2.5E0));
#634=VERTEX_POINT('',#632);
#635=VERTEX_POINT('',#633);
#636=CARTESIAN_POINT('',(1.295343475419E1,0.E0,2.5E0));
#637=VERTEX_POINT('',#636);
#638=CARTESIAN_POINT('',(1.719490474329E1,0.E0,4.852372320066E0));
#639=VERTEX_POINT('',#638);
#640=CARTESIAN_POINT('',(0.E0,0.E0,0.E0));
#641=DIRECTION('',(0.E0,1.E0,0.E0));
#642=DIRECTION('',(1.E0,0.E0,0.E0));
#643=AXIS2_PLACEMENT_3D('',#640,#641,#642);
#644=PLANE('',#643);
#646=ORIENTED_EDGE('',*,*,#645,.F.);
#648=ORIENTED_EDGE('',*,*,#647,.T.);
#650=ORIENTED_EDGE('',*,*,#649,.T.);
#652=ORIENTED_EDGE('',*,*,#651,.T.);
#654=ORIENTED_EDGE('',*,*,#653,.T.);
#655=EDGE_LOOP('',(#646,#648,#650,#652,#654));
#656=FACE_OUTER_BOUND('',#655,.F.);
#658=ORIENTED_EDGE('',*,*,#657,.F.);
#660=ORIENTED_EDGE('',*,*,#659,.F.);
#661=EDGE_LOOP('',(#658,#660));
#662=FACE_BOUND('',#661,.F.);
#664=ORIENTED_EDGE('',*,*,#663,.F.);
#666=ORIENTED_EDGE('',*,*,#665,.F.);
#668=ORIENTED_EDGE('',*,*,#667,.F.);
#670=ORIENTED_EDGE('',*,*,#669,.F.);
#672=ORIENTED_EDGE('',*,*,#671,.F.);
#674=ORIENTED_EDGE('',*,*,#673,.F.);
#676=ORIENTED_EDGE('',*,*,#675,.F.);
#678=ORIENTED_EDGE('',*,*,#677,.F.);
#680=ORIENTED_EDGE('',*,*,#679,.F.);
#682=ORIENTED_EDGE('',*,*,#681,.F.);
#684=ORIENTED_EDGE('',*,*,#683,.F.);
#686=ORIENTED_EDGE('',*,*,#685,.F.);
#687=EDGE_LOOP('',(#664,#666,#668,#670,#672,#674,#676,#678,#680,#682,#684,
#686));
#688=FACE_BOUND('',#687,.F.);
#690=ORIENTED_EDGE('',*,*,#689,.F.);
#692=ORIENTED_EDGE('',*,*,#691,.F.);
#693=EDGE_LOOP('',(#690,#692));
#694=FACE_BOUND('',#693,.F.);
#696=CARTESIAN_POINT('',(3.25E1,0.E0,-7.5E0));
#697=DIRECTION('',(0.E0,1.E0,0.E0));
#698=DIRECTION('',(1.E0,0.E0,0.E0));
#699=AXIS2_PLACEMENT_3D('',#696,#697,#698);
#700=CYLINDRICAL_SURFACE('',#699,1.E0);
#701=ORIENTED_EDGE('',*,*,#689,.T.);
#703=ORIENTED_EDGE('',*,*,#702,.T.);
#705=ORIENTED_EDGE('',*,*,#704,.F.);
#707=ORIENTED_EDGE('',*,*,#706,.F.);
#708=EDGE_LOOP('',(#701,#703,#705,#707));
#709=FACE_OUTER_BOUND('',#708,.F.);
#711=CARTESIAN_POINT('',(3.25E1,0.E0,-7.5E0));
#712=DIRECTION('',(0.E0,1.E0,0.E0));
#713=DIRECTION('',(1.E0,0.E0,0.E0));
#714=AXIS2_PLACEMENT_3D('',#711,#712,#713);
#715=CYLINDRICAL_SURFACE('',#714,1.E0);
#716=ORIENTED_EDGE('',*,*,#691,.T.);
#717=ORIENTED_EDGE('',*,*,#706,.T.);
#719=ORIENTED_EDGE('',*,*,#718,.F.);
#720=ORIENTED_EDGE('',*,*,#702,.F.);
#721=EDGE_LOOP('',(#716,#717,#719,#720));
#722=FACE_OUTER_BOUND('',#721,.F.);
#724=CARTESIAN_POINT('',(0.E0,3.E-1,0.E0));
#725=DIRECTION('',(0.E0,1.E0,0.E0));
#726=DIRECTION('',(1.E0,0.E0,0.E0));
#727=AXIS2_PLACEMENT_3D('',#724,#725,#726);
#728=PLANE('',#727);
#730=ORIENTED_EDGE('',*,*,#729,.F.);
#732=ORIENTED_EDGE('',*,*,#731,.F.);
#734=ORIENTED_EDGE('',*,*,#733,.F.);
#736=ORIENTED_EDGE('',*,*,#735,.F.);
#738=ORIENTED_EDGE('',*,*,#737,.F.);
#739=EDGE_LOOP('',(#730,#732,#734,#736,#738));
#740=FACE_OUTER_BOUND('',#739,.F.);
#742=ORIENTED_EDGE('',*,*,#741,.T.);
#744=ORIENTED_EDGE('',*,*,#743,.T.);
#745=EDGE_LOOP('',(#742,#744));
#746=FACE_BOUND('',#745,.F.);
#748=ORIENTED_EDGE('',*,*,#747,.F.);
#750=ORIENTED_EDGE('',*,*,#749,.T.);
#752=ORIENTED_EDGE('',*,*,#751,.F.);
#754=ORIENTED_EDGE('',*,*,#753,.T.);
#756=ORIENTED_EDGE('',*,*,#755,.F.);
#758=ORIENTED_EDGE('',*,*,#757,.T.);
#760=ORIENTED_EDGE('',*,*,#759,.F.);
#762=ORIENTED_EDGE('',*,*,#761,.T.);
#764=ORIENTED_EDGE('',*,*,#763,.F.);
#766=ORIENTED_EDGE('',*,*,#765,.T.);
#768=ORIENTED_EDGE('',*,*,#767,.F.);
#770=ORIENTED_EDGE('',*,*,#769,.T.);
#771=EDGE_LOOP('',(#748,#750,#752,#754,#756,#758,#760,#762,#764,#766,#768,
#770));
#772=FACE_BOUND('',#771,.F.);
#773=ORIENTED_EDGE('',*,*,#704,.T.);
#774=ORIENTED_EDGE('',*,*,#718,.T.);
#775=EDGE_LOOP('',(#773,#774));
#776=FACE_BOUND('',#775,.F.);
#778=CARTESIAN_POINT('',(-3.25E1,0.E0,7.5E0));
#779=DIRECTION('',(0.E0,1.E0,0.E0));
#780=DIRECTION('',(1.E0,0.E0,0.E0));
#781=AXIS2_PLACEMENT_3D('',#778,#779,#780);
#782=CYLINDRICAL_SURFACE('',#781,1.E0);
#783=ORIENTED_EDGE('',*,*,#657,.T.);
#785=ORIENTED_EDGE('',*,*,#784,.T.);
#786=ORIENTED_EDGE('',*,*,#741,.F.);
#788=ORIENTED_EDGE('',*,*,#787,.F.);
#789=EDGE_LOOP('',(#783,#785,#786,#788));
#790=FACE_OUTER_BOUND('',#789,.F.);
#792=CARTESIAN_POINT('',(-3.25E1,0.E0,7.5E0));
#793=DIRECTION('',(0.E0,1.E0,0.E0));
#794=DIRECTION('',(1.E0,0.E0,0.E0));
#795=AXIS2_PLACEMENT_3D('',#792,#793,#794);
#796=CYLINDRICAL_SURFACE('',#795,1.E0);
#797=ORIENTED_EDGE('',*,*,#659,.T.);
#798=ORIENTED_EDGE('',*,*,#787,.T.);
#799=ORIENTED_EDGE('',*,*,#743,.F.);
#800=ORIENTED_EDGE('',*,*,#784,.F.);
#801=EDGE_LOOP('',(#797,#798,#799,#800));
#802=FACE_OUTER_BOUND('',#801,.F.);
#804=CARTESIAN_POINT('',(-1.295343475419E1,-6.04236E0,-7.5E0));
#805=DIRECTION('',(0.E0,1.E0,0.E0));
#806=DIRECTION('',(-8.482939978202E-1,0.E0,5.295255359869E-1));
#807=AXIS2_PLACEMENT_3D('',#804,#805,#806);
#808=CYLINDRICAL_SURFACE('',#807,5.E0);
#809=ORIENTED_EDGE('',*,*,#747,.T.);
#811=ORIENTED_EDGE('',*,*,#810,.F.);
#812=ORIENTED_EDGE('',*,*,#663,.T.);
#814=ORIENTED_EDGE('',*,*,#813,.T.);
#815=EDGE_LOOP('',(#809,#811,#812,#814));
#816=FACE_OUTER_BOUND('',#815,.F.);
#818=CARTESIAN_POINT('',(1.861324865405E1,0.E0,-2.5E0));
#819=DIRECTION('',(0.E0,0.E0,-1.E0));
#820=DIRECTION('',(-1.E0,0.E0,0.E0));
#821=AXIS2_PLACEMENT_3D('',#818,#819,#820);
#822=PLANE('',#821);
#823=ORIENTED_EDGE('',*,*,#810,.T.);
#824=ORIENTED_EDGE('',*,*,#769,.F.);
#826=ORIENTED_EDGE('',*,*,#825,.T.);
#827=ORIENTED_EDGE('',*,*,#665,.T.);
#828=EDGE_LOOP('',(#823,#824,#826,#827));
#829=FACE_OUTER_BOUND('',#828,.F.);
#831=CARTESIAN_POINT('',(1.564366724176E1,6.34236E0,2.5E0));
#832=DIRECTION('',(0.E0,-1.E0,0.E0));
#833=DIRECTION('',(0.E0,0.E0,-1.E0));
#834=AXIS2_PLACEMENT_3D('',#831,#832,#833);
#835=CYLINDRICAL_SURFACE('',#834,5.E0);
#836=ORIENTED_EDGE('',*,*,#825,.F.);
#837=ORIENTED_EDGE('',*,*,#767,.T.);
#839=ORIENTED_EDGE('',*,*,#838,.T.);
#840=ORIENTED_EDGE('',*,*,#667,.T.);
#841=EDGE_LOOP('',(#836,#837,#839,#840));
#842=FACE_OUTER_BOUND('',#841,.F.);
#844=CARTESIAN_POINT('',(2.347571601798E1,0.E0,6.423409912589E0));
#845=DIRECTION('',(8.780960079896E-1,0.E0,-4.784844832936E-1));
#846=DIRECTION('',(-4.784844832936E-1,0.E0,-8.780960079896E-1));
#847=AXIS2_PLACEMENT_3D('',#844,#845,#846);
#848=PLANE('',#847);
#849=ORIENTED_EDGE('',*,*,#838,.F.);
#850=ORIENTED_EDGE('',*,*,#765,.F.);
#852=ORIENTED_EDGE('',*,*,#851,.F.);
#853=ORIENTED_EDGE('',*,*,#669,.T.);
#854=EDGE_LOOP('',(#849,#850,#852,#853));
#855=FACE_OUTER_BOUND('',#854,.F.);
#857=CARTESIAN_POINT('',(2.15E1,0.E0,7.5E0));
#858=DIRECTION('',(0.E0,1.E0,0.E0));
#859=DIRECTION('',(1.E0,0.E0,0.E0));
#860=AXIS2_PLACEMENT_3D('',#857,#858,#859);
#861=CYLINDRICAL_SURFACE('',#860,2.25E0);
#862=ORIENTED_EDGE('',*,*,#763,.T.);
#864=ORIENTED_EDGE('',*,*,#863,.F.);
#865=ORIENTED_EDGE('',*,*,#671,.T.);
#866=ORIENTED_EDGE('',*,*,#851,.T.);
#867=EDGE_LOOP('',(#862,#864,#865,#866));
#868=FACE_OUTER_BOUND('',#867,.F.);
#870=CARTESIAN_POINT('',(1.572649730810E1,0.E0,2.5E0));
#871=DIRECTION('',(-8.482939978202E-1,0.E0,5.295255359869E-1));
#872=DIRECTION('',(5.295255359869E-1,0.E0,8.482939978202E-1));
#873=AXIS2_PLACEMENT_3D('',#870,#871,#872);
#874=PLANE('',#873);
#876=ORIENTED_EDGE('',*,*,#875,.F.);
#877=ORIENTED_EDGE('',*,*,#673,.T.);
#878=ORIENTED_EDGE('',*,*,#863,.T.);
#879=ORIENTED_EDGE('',*,*,#761,.F.);
#880=EDGE_LOOP('',(#876,#877,#878,#879));
#881=FACE_OUTER_BOUND('',#880,.F.);
#883=CARTESIAN_POINT('',(1.295343475419E1,-6.04236E0,7.5E0));
#884=DIRECTION('',(0.E0,1.E0,0.E0));
#885=DIRECTION('',(8.482939978202E-1,0.E0,-5.295255359869E-1));
#886=AXIS2_PLACEMENT_3D('',#883,#884,#885);
#887=CYLINDRICAL_SURFACE('',#886,5.E0);
#888=ORIENTED_EDGE('',*,*,#759,.T.);
#890=ORIENTED_EDGE('',*,*,#889,.F.);
#891=ORIENTED_EDGE('',*,*,#675,.T.);
#892=ORIENTED_EDGE('',*,*,#875,.T.);
#893=EDGE_LOOP('',(#888,#890,#891,#892));
#894=FACE_OUTER_BOUND('',#893,.F.);
#896=CARTESIAN_POINT('',(-1.861324865405E1,0.E0,2.5E0));
#897=DIRECTION('',(0.E0,0.E0,1.E0));
#898=DIRECTION('',(1.E0,0.E0,0.E0));
#899=AXIS2_PLACEMENT_3D('',#896,#897,#898);
#900=PLANE('',#899);
#901=ORIENTED_EDGE('',*,*,#889,.T.);
#902=ORIENTED_EDGE('',*,*,#757,.F.);
#904=ORIENTED_EDGE('',*,*,#903,.T.);
#905=ORIENTED_EDGE('',*,*,#677,.T.);
#906=EDGE_LOOP('',(#901,#902,#904,#905));
#907=FACE_OUTER_BOUND('',#906,.F.);
#909=CARTESIAN_POINT('',(-1.564366724176E1,6.34236E0,-2.5E0));
#910=DIRECTION('',(0.E0,-1.E0,0.E0));
#911=DIRECTION('',(0.E0,0.E0,1.E0));
#912=AXIS2_PLACEMENT_3D('',#909,#910,#911);
#913=CYLINDRICAL_SURFACE('',#912,5.E0);
#914=ORIENTED_EDGE('',*,*,#903,.F.);
#915=ORIENTED_EDGE('',*,*,#755,.T.);
#917=ORIENTED_EDGE('',*,*,#916,.T.);
#918=ORIENTED_EDGE('',*,*,#679,.T.);
#919=EDGE_LOOP('',(#914,#915,#917,#918));
#920=FACE_OUTER_BOUND('',#919,.F.);
#922=CARTESIAN_POINT('',(-2.347571601798E1,0.E0,-6.423409912589E0));
#923=DIRECTION('',(-8.780960079896E-1,0.E0,4.784844832936E-1));
#924=DIRECTION('',(4.784844832936E-1,0.E0,8.780960079896E-1));
#925=AXIS2_PLACEMENT_3D('',#922,#923,#924);
#926=PLANE('',#925);
#927=ORIENTED_EDGE('',*,*,#916,.F.);
#928=ORIENTED_EDGE('',*,*,#753,.F.);
#930=ORIENTED_EDGE('',*,*,#929,.F.);
#931=ORIENTED_EDGE('',*,*,#681,.T.);
#932=EDGE_LOOP('',(#927,#928,#930,#931));
#933=FACE_OUTER_BOUND('',#932,.F.);
#935=CARTESIAN_POINT('',(-2.15E1,0.E0,-7.5E0));
#936=DIRECTION('',(0.E0,1.E0,0.E0));
#937=DIRECTION('',(1.E0,0.E0,0.E0));
#938=AXIS2_PLACEMENT_3D('',#935,#936,#937);
#939=CYLINDRICAL_SURFACE('',#938,2.25E0);
#940=ORIENTED_EDGE('',*,*,#683,.T.);
#941=ORIENTED_EDGE('',*,*,#929,.T.);
#942=ORIENTED_EDGE('',*,*,#751,.T.);
#944=ORIENTED_EDGE('',*,*,#943,.F.);
#945=EDGE_LOOP('',(#940,#941,#942,#944));
#946=FACE_OUTER_BOUND('',#945,.F.);
#948=CARTESIAN_POINT('',(-1.572649730810E1,0.E0,-2.5E0));
#949=DIRECTION('',(8.482939978202E-1,0.E0,-5.295255359869E-1));
#950=DIRECTION('',(-5.295255359869E-1,0.E0,-8.482939978202E-1));
#951=AXIS2_PLACEMENT_3D('',#948,#949,#950);
#952=PLANE('',#951);
#953=ORIENTED_EDGE('',*,*,#813,.F.);
#954=ORIENTED_EDGE('',*,*,#685,.T.);
#955=ORIENTED_EDGE('',*,*,#943,.T.);
#956=ORIENTED_EDGE('',*,*,#749,.F.);
#957=EDGE_LOOP('',(#953,#954,#955,#956));
#958=FACE_OUTER_BOUND('',#957,.F.);
#960=CARTESIAN_POINT('',(-3.5E1,1.5E-1,-1.E1));
#961=DIRECTION('',(-7.071067811865E-1,0.E0,-7.071067811865E-1));
#962=DIRECTION('',(7.071067811865E-1,0.E0,-7.071067811865E-1));
#963=AXIS2_PLACEMENT_3D('',#960,#961,#962);
#964=PLANE('',#963);
#965=ORIENTED_EDGE('',*,*,#645,.T.);
#967=ORIENTED_EDGE('',*,*,#966,.F.);
#968=ORIENTED_EDGE('',*,*,#729,.T.);
#970=ORIENTED_EDGE('',*,*,#969,.T.);
#971=EDGE_LOOP('',(#965,#967,#968,#970));
#972=FACE_OUTER_BOUND('',#971,.F.);
#974=CARTESIAN_POINT('',(3.75E1,0.E0,-1.25E1));
#975=DIRECTION('',(0.E0,0.E0,-1.E0));
#976=DIRECTION('',(-1.E0,0.E0,0.E0));
#977=AXIS2_PLACEMENT_3D('',#974,#975,#976);
#978=PLANE('',#977);
#979=ORIENTED_EDGE('',*,*,#966,.T.);
#980=ORIENTED_EDGE('',*,*,#653,.F.);
#982=ORIENTED_EDGE('',*,*,#981,.T.);
#983=ORIENTED_EDGE('',*,*,#731,.T.);
#984=EDGE_LOOP('',(#979,#980,#982,#983));
#985=FACE_OUTER_BOUND('',#984,.F.);
#987=CARTESIAN_POINT('',(3.75E1,0.E0,1.25E1));
#988=DIRECTION('',(1.E0,0.E0,0.E0));
#989=DIRECTION('',(0.E0,0.E0,-1.E0));
#990=AXIS2_PLACEMENT_3D('',#987,#988,#989);
#991=PLANE('',#990);
#992=ORIENTED_EDGE('',*,*,#651,.F.);
#994=ORIENTED_EDGE('',*,*,#993,.T.);
#995=ORIENTED_EDGE('',*,*,#733,.T.);
#996=ORIENTED_EDGE('',*,*,#981,.F.);
#997=EDGE_LOOP('',(#992,#994,#995,#996));
#998=FACE_OUTER_BOUND('',#997,.F.);
#1000=CARTESIAN_POINT('',(-3.75E1,0.E0,1.25E1));
#1001=DIRECTION('',(0.E0,0.E0,1.E0));
#1002=DIRECTION('',(1.E0,0.E0,0.E0));
#1003=AXIS2_PLACEMENT_3D('',#1000,#1001,#1002);
#1004=PLANE('',#1003);
#1005=ORIENTED_EDGE('',*,*,#649,.F.);
#1007=ORIENTED_EDGE('',*,*,#1006,.T.);
#1008=ORIENTED_EDGE('',*,*,#735,.T.);
#1009=ORIENTED_EDGE('',*,*,#993,.F.);
#1010=EDGE_LOOP('',(#1005,#1007,#1008,#1009));
#1011=FACE_OUTER_BOUND('',#1010,.F.);
#1013=CARTESIAN_POINT('',(-3.75E1,0.E0,-1.25E1));
#1014=DIRECTION('',(-1.E0,0.E0,0.E0));
#1015=DIRECTION('',(0.E0,0.E0,1.E0));
#1016=AXIS2_PLACEMENT_3D('',#1013,#1014,#1015);
#1017=PLANE('',#1016);
#1018=ORIENTED_EDGE('',*,*,#969,.F.);
#1019=ORIENTED_EDGE('',*,*,#737,.T.);
#1020=ORIENTED_EDGE('',*,*,#1006,.F.);
#1021=ORIENTED_EDGE('',*,*,#647,.F.);
#1022=EDGE_LOOP('',(#1018,#1019,#1020,#1021));
#1023=FACE_OUTER_BOUND('',#1022,.F.);
#1025=CLOSED_SHELL('',(#695,#710,#723,#777,#791,#803,#817,#830,#843,#856,#869,
#882,#895,#908,#921,#934,#947,#959,#973,#986,#999,#1012,#1024));
#1026=MANIFOLD_SOLID_BREP('',#1025);
#1027=FILL_AREA_STYLE_COLOUR('',#67);
#1028=FILL_AREA_STYLE('',(#1027));
#1029=SURFACE_STYLE_FILL_AREA(#1028);
#1030=SURFACE_SIDE_STYLE('',(#1029));
#1031=SURFACE_STYLE_USAGE(.BOTH.,#1030);
#1032=PRESENTATION_STYLE_ASSIGNMENT((#1031));
#93=STYLED_ITEM('',(#1032),#1026);
#1033=PRESENTATION_LAYER_ASSIGNMENT('SOLIDE','',(#93));
#1036=PLANE_ANGLE_MEASURE_WITH_UNIT(PLANE_ANGLE_MEASURE(1.745329251994E-2),
#1035);
#1037=(CONVERSION_BASED_UNIT('DEGREE',#1036)NAMED_UNIT(*)PLANE_ANGLE_UNIT());
#1039=UNCERTAINTY_MEASURE_WITH_UNIT(LENGTH_MEASURE(7.905434841171E-3),#1034,
'distance_accuracy_value',
'Maximum model space distance between geometric entities at asserted connectivities');
#1042=MECHANICAL_DESIGN_GEOMETRIC_PRESENTATION_REPRESENTATION('',(#102,#110,
#118,#126,#134,#141,#148,#155,#163,#170,#177,#184,#191,#198,#205,#212,#219,#226,
#233,#241,#249,#257,#265,#273,#280,#287,#294,#302,#309,#316,#323,#330,#337,#344,
#351,#358,#365,#372,#379,#386,#394,#402,#409,#417,#424,#432,#439,#446,#453,#460,
#468,#476,#483,#491,#498,#506,#513,#520,#527,#534,#541,#548,#555,#93),#1040);
#1043=APPLICATION_CONTEXT('automotive_design');
#1044=APPLICATION_PROTOCOL_DEFINITION('international standard',
'automotive_design',2001,#1043);
#1045=PRODUCT_DEFINITION_CONTEXT('part definition',#1043,'design');
#1046=PRODUCT_CONTEXT('',#1043,'mechanical');
#1047=PRODUCT('BCBBBV6_CHAMBRE_INFERIEURE','BCBBBV6_CHAMBRE_INFERIEURE',
'NOT SPECIFIED',(#1046));
#1048=PRODUCT_DEFINITION_FORMATION('12','LAST_VERSION',#1047);
#1056=DERIVED_UNIT_ELEMENT(#1055,2.E0);
#1057=DERIVED_UNIT((#1056));
#1058=MEASURE_REPRESENTATION_ITEM('surface area measure',AREA_MEASURE(
3.271119807405E3),#1057);
#1063=DERIVED_UNIT_ELEMENT(#1062,3.E0);
#1064=DERIVED_UNIT((#1063));
#1065=MEASURE_REPRESENTATION_ITEM('volume measure',VOLUME_MEASURE(
4.760436202118E2),#1064);
#1069=CARTESIAN_POINT('centre point',(2.822745527820E-1,1.5E-1,
8.533881826071E-2));
#1074=DERIVED_UNIT_ELEMENT(#1073,2.E0);
#1075=DERIVED_UNIT((#1074));
#1076=MEASURE_REPRESENTATION_ITEM('surface area measure',AREA_MEASURE(
3.271119807405E3),#1075);
#1081=DERIVED_UNIT_ELEMENT(#1080,3.E0);
#1082=DERIVED_UNIT((#1081));
#1083=MEASURE_REPRESENTATION_ITEM('volume measure',VOLUME_MEASURE(
4.760436202118E2),#1082);
#1087=CARTESIAN_POINT('centre point',(2.822745527820E-1,1.5E-1,
8.533881826071E-2));
#1092=PRODUCT_RELATED_PRODUCT_CATEGORY('part','',(#1047));
#1094=GENERAL_PROPERTY('','PTC_COMMON_NAME','user defined attribute');
#1095=GENERAL_PROPERTY_ASSOCIATION('user defined attribute','',#1094,#1093);
#1096=DESCRIPTIVE_REPRESENTATION_ITEM('PTC_COMMON_NAME',
'bcbbbv6_chambre_inferieure.prt');
#1100=GENERAL_PROPERTY('','MATIERE','user defined attribute');
#1101=GENERAL_PROPERTY_ASSOCIATION('user defined attribute','',#1100,#1099);
#1102=DESCRIPTIVE_REPRESENTATION_ITEM('MATIERE','ACIER_A60');
#1106=GENERAL_PROPERTY('','FOURNISSEUR','user defined attribute');
#1107=GENERAL_PROPERTY_ASSOCIATION('user defined attribute','',#1106,#1105);
#1108=DESCRIPTIVE_REPRESENTATION_ITEM('FOURNISSEUR','hepia');
#1112=GENERAL_PROPERTY('','PRIX','user defined attribute');
#1113=GENERAL_PROPERTY_ASSOCIATION('user defined attribute','',#1112,#1111);
#1114=VALUE_REPRESENTATION_ITEM('PRIX',NUMERIC_MEASURE(0.E0));
#1117=DESCRIPTIVE_REPRESENTATION_ITEM('attribute description','Real Number');
#1122=GENERAL_PROPERTY('','MASSE','user defined attribute');
#1123=GENERAL_PROPERTY_ASSOCIATION('user defined attribute','',#1122,#1121);
#1124=VALUE_REPRESENTATION_ITEM('MASSE',NUMERIC_MEASURE(7.87E-3));
#1127=DESCRIPTIVE_REPRESENTATION_ITEM('attribute description','Real Number');
#1132=GENERAL_PROPERTY('','MASSE_KG','user defined attribute');
#1133=GENERAL_PROPERTY_ASSOCIATION('user defined attribute','',#1132,#1131);
#1134=VALUE_REPRESENTATION_ITEM('MASSE_KG',NUMERIC_MEASURE(0.E0));
#1137=DESCRIPTIVE_REPRESENTATION_ITEM('attribute description','Real Number');
#1142=GENERAL_PROPERTY('','PTC_MATERIAL_NAME','user defined attribute');
#1143=GENERAL_PROPERTY_ASSOCIATION('user defined attribute','',#1142,#1141);
#1144=DESCRIPTIVE_REPRESENTATION_ITEM('PTC_MATERIAL_NAME','ACIER_A60');
#1148=GENERAL_PROPERTY('','CONCEPTEUR','user defined attribute');
#1149=GENERAL_PROPERTY_ASSOCIATION('user defined attribute','',#1148,#1147);
#1150=DESCRIPTIVE_REPRESENTATION_ITEM('CONCEPTEUR','');
#1154=GENERAL_PROPERTY('','DESSIN','user defined attribute');
#1155=GENERAL_PROPERTY_ASSOCIATION('user defined attribute','',#1154,#1153);
#1156=DESCRIPTIVE_REPRESENTATION_ITEM('DESSIN','gm2-g1-00.00');
#1160=GENERAL_PROPERTY('','MFG_WP_MATERIAL','user defined attribute');
#1161=GENERAL_PROPERTY_ASSOCIATION('user defined attribute','',#1160,#1159);
#1162=DESCRIPTIVE_REPRESENTATION_ITEM('MFG_WP_MATERIAL','ACIER_A60');
#1=COLOUR_RGB('',0.E0,0.E0,4.7E-1);
#2=COLOUR_RGB('',0.E0,0.E0,6.E-1);
#3=COLOUR_RGB('',0.E0,0.E0,8.E-1);
#4=DRAUGHTING_PRE_DEFINED_COLOUR('blue');
#5=COLOUR_RGB('',0.E0,2.E-1,1.E0);
#6=COLOUR_RGB('',0.E0,4.E-1,0.E0);
#7=COLOUR_RGB('',0.E0,4.E-1,4.E-1);
#8=COLOUR_RGB('',0.E0,4.E-1,1.E0);
#9=COLOUR_RGB('',0.E0,5.3E-1,5.3E-1);
#10=COLOUR_RGB('',0.E0,6.E-1,0.E0);
#11=COLOUR_RGB('',0.E0,6.E-1,1.E0);
#12=COLOUR_RGB('',0.E0,8.E-1,0.E0);
#13=COLOUR_RGB('',0.E0,8.E-1,8.E-1);
#14=COLOUR_RGB('',0.E0,8.E-1,1.E0);
#15=DRAUGHTING_PRE_DEFINED_COLOUR('green');
#16=COLOUR_RGB('',0.E0,1.E0,2.E-1);
#17=COLOUR_RGB('',0.E0,1.E0,4.E-1);
#18=COLOUR_RGB('',0.E0,1.E0,6.E-1);
#19=COLOUR_RGB('',0.E0,1.E0,8.E-1);
#20=DRAUGHTING_PRE_DEFINED_COLOUR('cyan');
#21=COLOUR_RGB('',2.E-1,1.E0,0.E0);
#22=COLOUR_RGB('',2.E-1,1.E0,2.E-1);
#23=COLOUR_RGB('',2.E-1,1.E0,1.E0);
#24=COLOUR_RGB('',2.7E-1,0.E0,4.E-1);
#25=COLOUR_RGB('',2.7E-1,2.7E-1,0.E0);
#26=COLOUR_RGB('',2.7E-1,2.7E-1,1.E0);
#27=COLOUR_RGB('',3.3E-1,0.E0,0.E0);
#28=COLOUR_RGB('',3.3E-1,0.E0,5.3E-1);
#29=COLOUR_RGB('',4.E-1,0.E0,4.E-1);
#30=COLOUR_RGB('',4.E-1,0.E0,6.7E-1);
#31=COLOUR_RGB('',4.E-1,1.3E-1,0.E0);
#32=COLOUR_RGB('',4.E-1,4.E-1,0.E0);
#33=COLOUR_RGB('',4.E-1,4.E-1,1.E0);
#34=COLOUR_RGB('',4.E-1,1.E0,0.E0);
#35=COLOUR_RGB('',4.E-1,1.E0,4.E-1);
#36=COLOUR_RGB('',4.E-1,1.E0,1.E0);
#37=COLOUR_RGB('',4.7E-1,0.E0,0.E0);
#38=COLOUR_RGB('',4.7E-1,0.E0,8.7E-1);
#39=COLOUR_RGB('',4.7E-1,2.E-1,7.E-2);
#40=COLOUR_RGB('',4.7E-1,4.7E-1,4.7E-1);
#41=COLOUR_RGB('',5.3E-1,2.7E-1,1.3E-1);
#42=COLOUR_RGB('',6.E-1,2.E-1,1.E0);
#43=COLOUR_RGB('',6.E-1,3.3E-1,2.E-1);
#44=COLOUR_RGB('',6.E-1,6.E-1,0.E0);
#45=COLOUR_RGB('',6.E-1,6.E-1,1.E0);
#46=COLOUR_RGB('',6.E-1,1.E0,6.E-1);
#47=COLOUR_RGB('',6.E-1,1.E0,1.E0);
#48=COLOUR_RGB('',6.35294E-1,6.86275E-1,7.4902E-1);
#49=COLOUR_RGB('',6.7E-1,0.E0,0.E0);
#50=COLOUR_RGB('',6.7E-1,0.E0,5.3E-1);
#51=COLOUR_RGB('',6.7E-1,4.E-1,2.7E-1);
#52=COLOUR_RGB('',6.7E-1,4.E-1,1.E0);
#53=COLOUR_RGB('',6.7E-1,1.E0,0.E0);
#54=COLOUR_RGB('',7.3E-1,2.7E-1,1.E0);
#55=COLOUR_RGB('',7.3E-1,4.E-1,0.E0);
#56=COLOUR_RGB('',7.3E-1,4.7E-1,3.3E-1);
#57=COLOUR_RGB('',7.3E-1,7.3E-1,7.3E-1);
#58=COLOUR_RGB('',8.E-1,0.E0,8.E-1);
#59=COLOUR_RGB('',8.E-1,5.3E-1,4.E-1);
#60=COLOUR_RGB('',8.E-1,6.E-1,1.E0);
#61=COLOUR_RGB('',8.E-1,8.E-1,0.E0);
#62=COLOUR_RGB('',8.E-1,8.E-1,1.E0);
#63=COLOUR_RGB('',8.E-1,1.E0,8.E-1);
#64=COLOUR_RGB('',8.E-1,1.E0,1.E0);
#65=COLOUR_RGB('',8.7E-1,0.E0,0.E0);
#66=COLOUR_RGB('',8.7E-1,6.E-1,4.7E-1);
#67=COLOUR_RGB('',8.784E-1,9.49E-1,1.E0);
#68=COLOUR_RGB('',9.3E-1,1.E0,1.E0);
#69=DRAUGHTING_PRE_DEFINED_COLOUR('red');
#70=COLOUR_RGB('',1.E0,0.E0,2.7E-1);
#71=COLOUR_RGB('',1.E0,0.E0,4.7E-1);
#72=DRAUGHTING_PRE_DEFINED_COLOUR('magenta');
#73=COLOUR_RGB('',1.E0,2.E-1,1.E0);
#74=COLOUR_RGB('',1.E0,2.7E-1,0.E0);
#75=COLOUR_RGB('',1.E0,2.7E-1,2.7E-1);
#76=COLOUR_RGB('',1.E0,4.E-1,1.E0);
#77=COLOUR_RGB('',1.E0,4.7E-1,0.E0);
#78=COLOUR_RGB('',1.E0,4.7E-1,5.3E-1);
#79=COLOUR_RGB('',1.E0,6.E-1,1.E0);
#80=COLOUR_RGB('',1.E0,6.7E-1,0.E0);
#81=COLOUR_RGB('',1.E0,6.7E-1,6.7E-1);
#82=COLOUR_RGB('',1.E0,7.3E-1,5.3E-1);
#83=COLOUR_RGB('',1.E0,8.E-1,8.E-1);
#84=COLOUR_RGB('',1.E0,8.E-1,1.E0);
#85=COLOUR_RGB('',1.E0,8.7E-1,0.E0);
#86=COLOUR_RGB('',1.E0,9.3E-1,9.3E-1);
#87=DRAUGHTING_PRE_DEFINED_COLOUR('yellow');
#88=COLOUR_RGB('',1.E0,1.E0,1.3E-1);
#89=COLOUR_RGB('',1.E0,1.E0,3.3E-1);
#90=COLOUR_RGB('',1.E0,1.E0,5.3E-1);
#91=COLOUR_RGB('',1.E0,1.E0,7.3E-1);
#92=DRAUGHTING_PRE_DEFINED_COLOUR('white');
#98=CIRCLE('',#97,1.E0);
#107=CIRCLE('',#106,1.E0);
#115=CIRCLE('',#114,1.E0);
#123=CIRCLE('',#122,1.E0);
#131=CIRCLE('',#130,5.E0);
#160=CIRCLE('',#159,5.E0);
#238=CIRCLE('',#237,1.E0);
#246=CIRCLE('',#245,1.E0);
#254=CIRCLE('',#253,1.E0);
#262=CIRCLE('',#261,1.E0);
#270=CIRCLE('',#269,5.E0);
#299=CIRCLE('',#298,5.E0);
#391=CIRCLE('',#390,5.E0);
#399=CIRCLE('',#398,5.E0);
#414=CIRCLE('',#413,2.25E0);
#429=CIRCLE('',#428,2.25E0);
#465=CIRCLE('',#464,5.E0);
#473=CIRCLE('',#472,5.E0);
#488=CIRCLE('',#487,2.25E0);
#503=CIRCLE('',#502,2.25E0);
#645=EDGE_CURVE('',#586,#587,#188,.T.);
#647=EDGE_CURVE('',#586,#558,#195,.T.);
#649=EDGE_CURVE('',#558,#559,#202,.T.);
#651=EDGE_CURVE('',#559,#561,#209,.T.);
#653=EDGE_CURVE('',#561,#587,#216,.T.);
#657=EDGE_CURVE('',#574,#575,#115,.T.);
#659=EDGE_CURVE('',#575,#574,#123,.T.);
#663=EDGE_CURVE('',#629,#631,#131,.T.);
#665=EDGE_CURVE('',#619,#629,#138,.T.);
#667=EDGE_CURVE('',#623,#619,#399,.T.);
#669=EDGE_CURVE('',#602,#623,#145,.T.);
#671=EDGE_CURVE('',#606,#602,#429,.T.);
#673=EDGE_CURVE('',#639,#606,#152,.T.);
#675=EDGE_CURVE('',#637,#639,#160,.T.);
#677=EDGE_CURVE('',#611,#637,#167,.T.);
#679=EDGE_CURVE('',#615,#611,#473,.T.);
#681=EDGE_CURVE('',#598,#615,#174,.T.);
#683=EDGE_CURVE('',#594,#598,#488,.T.);
#685=EDGE_CURVE('',#631,#594,#181,.T.);
#689=EDGE_CURVE('',#570,#571,#98,.T.);
#691=EDGE_CURVE('',#571,#570,#107,.T.);
#695=ADVANCED_FACE('',(#656,#662,#688,#694),#644,.F.);
#702=EDGE_CURVE('',#571,#579,#230,.T.);
#704=EDGE_CURVE('',#578,#579,#238,.T.);
#706=EDGE_CURVE('',#570,#578,#223,.T.);
#710=ADVANCED_FACE('',(#709),#700,.F.);
#718=EDGE_CURVE('',#579,#578,#246,.T.);
#723=ADVANCED_FACE('',(#722),#715,.F.);
#729=EDGE_CURVE('',#589,#591,#327,.T.);
#731=EDGE_CURVE('',#567,#589,#334,.T.);
#733=EDGE_CURVE('',#565,#567,#341,.T.);
#735=EDGE_CURVE('',#564,#565,#348,.T.);
#737=EDGE_CURVE('',#591,#564,#355,.T.);
#741=EDGE_CURVE('',#582,#583,#254,.T.);
#743=EDGE_CURVE('',#583,#582,#262,.T.);
#747=EDGE_CURVE('',#626,#627,#270,.T.);
#749=EDGE_CURVE('',#626,#595,#277,.T.);
#751=EDGE_CURVE('',#599,#595,#503,.T.);
#753=EDGE_CURVE('',#599,#614,#284,.T.);
#755=EDGE_CURVE('',#610,#614,#465,.T.);
#757=EDGE_CURVE('',#610,#635,#291,.T.);
#759=EDGE_CURVE('',#634,#635,#299,.T.);
#761=EDGE_CURVE('',#634,#607,#306,.T.);
#763=EDGE_CURVE('',#603,#607,#414,.T.);
#765=EDGE_CURVE('',#603,#622,#313,.T.);
#767=EDGE_CURVE('',#618,#622,#391,.T.);
#769=EDGE_CURVE('',#618,#627,#320,.T.);
#777=ADVANCED_FACE('',(#740,#746,#772,#776),#728,.T.);
#784=EDGE_CURVE('',#575,#583,#369,.T.);
#787=EDGE_CURVE('',#574,#582,#362,.T.);
#791=ADVANCED_FACE('',(#790),#782,.F.);
#803=ADVANCED_FACE('',(#802),#796,.F.);
#810=EDGE_CURVE('',#629,#627,#376,.T.);
#813=EDGE_CURVE('',#631,#626,#517,.T.);
#817=ADVANCED_FACE('',(#816),#808,.T.);
#825=EDGE_CURVE('',#618,#619,#383,.T.);
#830=ADVANCED_FACE('',(#829),#822,.F.);
#838=EDGE_CURVE('',#622,#623,#406,.T.);
#843=ADVANCED_FACE('',(#842),#835,.F.);
#851=EDGE_CURVE('',#602,#603,#436,.T.);
#856=ADVANCED_FACE('',(#855),#848,.F.);
#863=EDGE_CURVE('',#606,#607,#421,.T.);
#869=ADVANCED_FACE('',(#868),#861,.F.);
#875=EDGE_CURVE('',#639,#634,#443,.T.);
#882=ADVANCED_FACE('',(#881),#874,.F.);
#889=EDGE_CURVE('',#637,#635,#450,.T.);
#895=ADVANCED_FACE('',(#894),#887,.T.);
#903=EDGE_CURVE('',#610,#611,#457,.T.);
#908=ADVANCED_FACE('',(#907),#900,.F.);
#916=EDGE_CURVE('',#614,#615,#480,.T.);
#921=ADVANCED_FACE('',(#920),#913,.F.);
#929=EDGE_CURVE('',#598,#599,#495,.T.);
#934=ADVANCED_FACE('',(#933),#926,.F.);
#943=EDGE_CURVE('',#594,#595,#510,.T.);
#947=ADVANCED_FACE('',(#946),#939,.F.);
#959=ADVANCED_FACE('',(#958),#952,.F.);
#966=EDGE_CURVE('',#589,#587,#524,.T.);
#969=EDGE_CURVE('',#591,#586,#552,.T.);
#973=ADVANCED_FACE('',(#972),#964,.T.);
#981=EDGE_CURVE('',#561,#567,#531,.T.);
#986=ADVANCED_FACE('',(#985),#978,.T.);
#993=EDGE_CURVE('',#559,#565,#538,.T.);
#999=ADVANCED_FACE('',(#998),#991,.T.);
#1006=EDGE_CURVE('',#558,#564,#545,.T.);
#1012=ADVANCED_FACE('',(#1011),#1004,.T.);
#1024=ADVANCED_FACE('',(#1023),#1017,.T.);
#1034=(LENGTH_UNIT()NAMED_UNIT(*)SI_UNIT(.MILLI.,.METRE.));
#1035=(NAMED_UNIT(*)PLANE_ANGLE_UNIT()SI_UNIT($,.RADIAN.));
#1038=(NAMED_UNIT(*)SI_UNIT($,.STERADIAN.)SOLID_ANGLE_UNIT());
#1040=(GEOMETRIC_REPRESENTATION_CONTEXT(3)GLOBAL_UNCERTAINTY_ASSIGNED_CONTEXT((
#1039))GLOBAL_UNIT_ASSIGNED_CONTEXT((#1034,#1037,#1038))REPRESENTATION_CONTEXT(
'ID1','3'));
#1041=ADVANCED_BREP_SHAPE_REPRESENTATION('',(#1026),#1040);
#1049=PRODUCT_DEFINITION('part definition','',#1048,#1045);
#1050=PRODUCT_DEFINITION_SHAPE('','SHAPE FOR BCBBBV6_CHAMBRE_INFERIEURE.',
#1049);
#1051=SHAPE_ASPECT('','solid data associated with BCBBBV6_CHAMBRE_INFERIEURE',
#1050,.F.);
#1052=PROPERTY_DEFINITION('',
'shape for solid data with which properties are associated',#1051);
#1053=SHAPE_REPRESENTATION('',(#1026),#1040);
#1054=SHAPE_DEFINITION_REPRESENTATION(#1052,#1053);
#1055=(LENGTH_UNIT()NAMED_UNIT(*)SI_UNIT(.MILLI.,.METRE.));
#1059=PROPERTY_DEFINITION('geometric validation property',
'area of BCBBBV6_CHAMBRE_INFERIEURE',#1051);
#1060=REPRESENTATION('surface area',(#1058),#1040);
#1061=PROPERTY_DEFINITION_REPRESENTATION(#1059,#1060);
#1062=(LENGTH_UNIT()NAMED_UNIT(*)SI_UNIT(.MILLI.,.METRE.));
#1066=PROPERTY_DEFINITION('geometric validation property',
'volume of BCBBBV6_CHAMBRE_INFERIEURE',#1051);
#1067=REPRESENTATION('volume',(#1065),#1040);
#1068=PROPERTY_DEFINITION_REPRESENTATION(#1066,#1067);
#1070=PROPERTY_DEFINITION('geometric validation property',
'centroid of BCBBBV6_CHAMBRE_INFERIEURE',#1051);
#1071=REPRESENTATION('centroid',(#1069),#1040);
#1072=PROPERTY_DEFINITION_REPRESENTATION(#1070,#1071);
#1073=(LENGTH_UNIT()NAMED_UNIT(*)SI_UNIT(.MILLI.,.METRE.));
#1077=PROPERTY_DEFINITION('geometric validation property',
'area of BCBBBV6_CHAMBRE_INFERIEURE',#1050);
#1078=REPRESENTATION('surface area',(#1076),#1040);
#1079=PROPERTY_DEFINITION_REPRESENTATION(#1077,#1078);
#1080=(LENGTH_UNIT()NAMED_UNIT(*)SI_UNIT(.MILLI.,.METRE.));
#1084=PROPERTY_DEFINITION('geometric validation property',
'volume of BCBBBV6_CHAMBRE_INFERIEURE',#1050);
#1085=REPRESENTATION('volume',(#1083),#1040);
#1086=PROPERTY_DEFINITION_REPRESENTATION(#1084,#1085);
#1088=PROPERTY_DEFINITION('geometric validation property',
'centroid of BCBBBV6_CHAMBRE_INFERIEURE',#1050);
#1089=REPRESENTATION('centroid',(#1087),#1040);
#1090=PROPERTY_DEFINITION_REPRESENTATION(#1088,#1089);
#1091=SHAPE_DEFINITION_REPRESENTATION(#1050,#1041);
#1093=PROPERTY_DEFINITION('PTC_COMMON_NAME','user defined attribute',#1049);
#1097=REPRESENTATION('',(#1096),#1040);
#1098=PROPERTY_DEFINITION_REPRESENTATION(#1093,#1097);
#1099=PROPERTY_DEFINITION('MATIERE','user defined attribute',#1049);
#1103=REPRESENTATION('',(#1102),#1040);
#1104=PROPERTY_DEFINITION_REPRESENTATION(#1099,#1103);
#1105=PROPERTY_DEFINITION('FOURNISSEUR','user defined attribute',#1049);
#1109=REPRESENTATION('',(#1108),#1040);
#1110=PROPERTY_DEFINITION_REPRESENTATION(#1105,#1109);
#1111=PROPERTY_DEFINITION('PRIX','user defined attribute',#1049);
#1115=REPRESENTATION('',(#1114),#1040);
#1116=PROPERTY_DEFINITION_REPRESENTATION(#1111,#1115);
#1118=REPRESENTATION('',(#1117),#1040);
#1119=PROPERTY_DEFINITION('attribute type designation','Real Number',#1112);
#1120=PROPERTY_DEFINITION_REPRESENTATION(#1119,#1118);
#1121=PROPERTY_DEFINITION('MASSE','user defined attribute',#1049);
#1125=REPRESENTATION('',(#1124),#1040);
#1126=PROPERTY_DEFINITION_REPRESENTATION(#1121,#1125);
#1128=REPRESENTATION('',(#1127),#1040);
#1129=PROPERTY_DEFINITION('attribute type designation','Real Number',#1122);
#1130=PROPERTY_DEFINITION_REPRESENTATION(#1129,#1128);
#1131=PROPERTY_DEFINITION('MASSE_KG','user defined attribute',#1049);
#1135=REPRESENTATION('',(#1134),#1040);
#1136=PROPERTY_DEFINITION_REPRESENTATION(#1131,#1135);
#1138=REPRESENTATION('',(#1137),#1040);
#1139=PROPERTY_DEFINITION('attribute type designation','Real Number',#1132);
#1140=PROPERTY_DEFINITION_REPRESENTATION(#1139,#1138);
#1141=PROPERTY_DEFINITION('PTC_MATERIAL_NAME','user defined attribute',#1049);
#1145=REPRESENTATION('',(#1144),#1040);
#1146=PROPERTY_DEFINITION_REPRESENTATION(#1141,#1145);
#1147=PROPERTY_DEFINITION('CONCEPTEUR','user defined attribute',#1049);
#1151=REPRESENTATION('',(#1150),#1040);
#1152=PROPERTY_DEFINITION_REPRESENTATION(#1147,#1151);
#1153=PROPERTY_DEFINITION('DESSIN','user defined attribute',#1049);
#1157=REPRESENTATION('',(#1156),#1040);
#1158=PROPERTY_DEFINITION_REPRESENTATION(#1153,#1157);
#1159=PROPERTY_DEFINITION('MFG_WP_MATERIAL','user defined attribute',#1049);
#1163=REPRESENTATION('',(#1162),#1040);
#1164=PROPERTY_DEFINITION_REPRESENTATION(#1159,#1163);
ENDSEC;
END-ISO-10303-21;
