# Supplementary material
Source: MDPI journal article supplement (https://www.mdpi.com/2076-3417/11/12/5584)
Supplement: s1 [file s1 › hepia_bbb_template.stp]

ISO-10303-21;
HEADER;
FILE_DESCRIPTION((''),'2;1');
FILE_NAME('BCBBBV6_GABARIT','2020-11-24T11:08:47',('loris.gomezbai'),(''),
'CREO PARAMETRIC BY PTC INC, 2016390','CREO PARAMETRIC BY PTC INC, 2016390','');
FILE_SCHEMA(('AUTOMOTIVE_DESIGN { 1 0 10303 214 1 1 1 1 }'));
ENDSEC;
DATA;
#94=CARTESIAN_POINT('',(3.25E1,0.E0,-7.5E0));
#95=DIRECTION('',(0.E0,1.E0,0.E0));
#96=DIRECTION('',(1.E0,0.E0,0.E0));
#97=AXIS2_PLACEMENT_3D('',#94,#95,#96);
#99=DRAUGHTING_PRE_DEFINED_CURVE_FONT('continuous');
#100=CURVE_STYLE('',#99,POSITIVE_LENGTH_MEASURE(2.E-2),#67);
#101=PRESENTATION_STYLE_ASSIGNMENT((#100));
#102=STYLED_ITEM('',(#101),#98);
#103=CARTESIAN_POINT('',(3.25E1,0.E0,-7.5E0));
#104=DIRECTION('',(0.E0,1.E0,0.E0));
#105=DIRECTION('',(-1.E0,0.E0,0.E0));
#106=AXIS2_PLACEMENT_3D('',#103,#104,#105);
#108=CURVE_STYLE('',#99,POSITIVE_LENGTH_MEASURE(2.E-2),#67);
#109=PRESENTATION_STYLE_ASSIGNMENT((#108));
#110=STYLED_ITEM('',(#109),#107);
#111=CARTESIAN_POINT('',(-3.25E1,0.E0,7.5E0));
#112=DIRECTION('',(0.E0,1.E0,0.E0));
#113=DIRECTION('',(1.E0,0.E0,0.E0));
#114=AXIS2_PLACEMENT_3D('',#111,#112,#113);
#116=CURVE_STYLE('',#99,POSITIVE_LENGTH_MEASURE(2.E-2),#67);
#117=PRESENTATION_STYLE_ASSIGNMENT((#116));
#118=STYLED_ITEM('',(#117),#115);
#119=CARTESIAN_POINT('',(-3.25E1,0.E0,7.5E0));
#120=DIRECTION('',(0.E0,1.E0,0.E0));
#121=DIRECTION('',(-1.E0,0.E0,0.E0));
#122=AXIS2_PLACEMENT_3D('',#119,#120,#121);
#124=CURVE_STYLE('',#99,POSITIVE_LENGTH_MEASURE(2.E-2),#67);
#125=PRESENTATION_STYLE_ASSIGNMENT((#124));
#126=STYLED_ITEM('',(#125),#123);
#127=DIRECTION('',(7.071067811865E-1,0.E0,-7.071067811865E-1));
#128=VECTOR('',#127,1.414213562373E1);
#129=CARTESIAN_POINT('',(-4.25E1,0.E0,-7.5E0));
#130=LINE('',#129,#128);
#131=CURVE_STYLE('',#99,POSITIVE_LENGTH_MEASURE(2.E-2),#67);
#132=PRESENTATION_STYLE_ASSIGNMENT((#131));
#133=STYLED_ITEM('',(#132),#130);
#134=DIRECTION('',(0.E0,0.E0,1.E0));
#135=VECTOR('',#134,2.E1);
#136=CARTESIAN_POINT('',(-4.25E1,0.E0,-7.5E0));
#137=LINE('',#136,#135);
#138=CURVE_STYLE('',#99,POSITIVE_LENGTH_MEASURE(2.E-2),#67);
#139=PRESENTATION_STYLE_ASSIGNMENT((#138));
#140=STYLED_ITEM('',(#139),#137);
#141=CARTESIAN_POINT('',(-3.75E1,0.E0,1.25E1));
#142=DIRECTION('',(0.E0,-1.E0,0.E0));
#143=DIRECTION('',(0.E0,0.E0,1.E0));
#144=AXIS2_PLACEMENT_3D('',#141,#142,#143);
#146=CURVE_STYLE('',#99,POSITIVE_LENGTH_MEASURE(2.E-2),#67);
#147=PRESENTATION_STYLE_ASSIGNMENT((#146));
#148=STYLED_ITEM('',(#147),#145);
#149=DIRECTION('',(1.E0,0.E0,0.E0));
#150=VECTOR('',#149,7.5E1);
#151=CARTESIAN_POINT('',(-3.75E1,0.E0,1.75E1));
#152=LINE('',#151,#150);
#153=CURVE_STYLE('',#99,POSITIVE_LENGTH_MEASURE(2.E-2),#67);
#154=PRESENTATION_STYLE_ASSIGNMENT((#153));
#155=STYLED_ITEM('',(#154),#152);
#156=CARTESIAN_POINT('',(3.75E1,0.E0,1.25E1));
#157=DIRECTION('',(0.E0,-1.E0,0.E0));
#158=DIRECTION('',(1.E0,0.E0,0.E0));
#159=AXIS2_PLACEMENT_3D('',#156,#157,#158);
#161=CURVE_STYLE('',#99,POSITIVE_LENGTH_MEASURE(2.E-2),#67);
#162=PRESENTATION_STYLE_ASSIGNMENT((#161));
#163=STYLED_ITEM('',(#162),#160);
#164=DIRECTION('',(0.E0,0.E0,-1.E0));
#165=VECTOR('',#164,2.5E1);
#166=CARTESIAN_POINT('',(4.25E1,0.E0,1.25E1));
#167=LINE('',#166,#165);
#168=CURVE_STYLE('',#99,POSITIVE_LENGTH_MEASURE(2.E-2),#67);
#169=PRESENTATION_STYLE_ASSIGNMENT((#168));
#170=STYLED_ITEM('',(#169),#167);
#171=CARTESIAN_POINT('',(3.75E1,0.E0,-1.25E1));
#172=DIRECTION('',(0.E0,-1.E0,0.E0));
#173=DIRECTION('',(0.E0,0.E0,-1.E0));
#174=AXIS2_PLACEMENT_3D('',#171,#172,#173);
#176=CURVE_STYLE('',#99,POSITIVE_LENGTH_MEASURE(2.E-2),#67);
#177=PRESENTATION_STYLE_ASSIGNMENT((#176));
#178=STYLED_ITEM('',(#177),#175);
#179=DIRECTION('',(-1.E0,0.E0,0.E0));
#180=VECTOR('',#179,7.E1);
#181=CARTESIAN_POINT('',(3.75E1,0.E0,-1.75E1));
#182=LINE('',#181,#180);
#183=CURVE_STYLE('',#99,POSITIVE_LENGTH_MEASURE(2.E-2),#67);
#184=PRESENTATION_STYLE_ASSIGNMENT((#183));
#185=STYLED_ITEM('',(#184),#182);
#186=DIRECTION('',(0.E0,1.E0,0.E0));
#187=VECTOR('',#186,5.E0);
#188=CARTESIAN_POINT('',(3.34E1,0.E0,-7.5E0));
#189=LINE('',#188,#187);
#190=CURVE_STYLE('',#99,POSITIVE_LENGTH_MEASURE(2.E-2),#67);
#191=PRESENTATION_STYLE_ASSIGNMENT((#190));
#192=STYLED_ITEM('',(#191),#189);
#193=DIRECTION('',(0.E0,1.E0,0.E0));
#194=VECTOR('',#193,5.E0);
#195=CARTESIAN_POINT('',(3.16E1,0.E0,-7.5E0));
#196=LINE('',#195,#194);
#197=CURVE_STYLE('',#99,POSITIVE_LENGTH_MEASURE(2.E-2),#67);
#198=PRESENTATION_STYLE_ASSIGNMENT((#197));
#199=STYLED_ITEM('',(#198),#196);
#200=CARTESIAN_POINT('',(3.25E1,5.E0,-7.5E0));
#201=DIRECTION('',(0.E0,1.E0,0.E0));
#202=DIRECTION('',(1.E0,0.E0,0.E0));
#203=AXIS2_PLACEMENT_3D('',#200,#201,#202);
#205=CURVE_STYLE('',#99,POSITIVE_LENGTH_MEASURE(2.E-2),#67);
#206=PRESENTATION_STYLE_ASSIGNMENT((#205));
#207=STYLED_ITEM('',(#206),#204);
#208=CARTESIAN_POINT('',(3.25E1,5.E0,-7.5E0));
#209=DIRECTION('',(0.E0,1.E0,0.E0));
#210=DIRECTION('',(-1.E0,0.E0,0.E0));
#211=AXIS2_PLACEMENT_3D('',#208,#209,#210);
#213=CURVE_STYLE('',#99,POSITIVE_LENGTH_MEASURE(2.E-2),#67);
#214=PRESENTATION_STYLE_ASSIGNMENT((#213));
#215=STYLED_ITEM('',(#214),#212);
#216=CARTESIAN_POINT('',(-3.25E1,5.E0,7.5E0));
#217=DIRECTION('',(0.E0,1.E0,0.E0));
#218=DIRECTION('',(1.E0,0.E0,0.E0));
#219=AXIS2_PLACEMENT_3D('',#216,#217,#218);
#221=CURVE_STYLE('',#99,POSITIVE_LENGTH_MEASURE(2.E-2),#67);
#222=PRESENTATION_STYLE_ASSIGNMENT((#221));
#223=STYLED_ITEM('',(#222),#220);
#224=CARTESIAN_POINT('',(-3.25E1,5.E0,7.5E0));
#225=DIRECTION('',(0.E0,1.E0,0.E0));
#226=DIRECTION('',(-1.E0,0.E0,0.E0));
#227=AXIS2_PLACEMENT_3D('',#224,#225,#226);
#229=CURVE_STYLE('',#99,POSITIVE_LENGTH_MEASURE(2.E-2),#67);
#230=PRESENTATION_STYLE_ASSIGNMENT((#229));
#231=STYLED_ITEM('',(#230),#228);
#232=DIRECTION('',(-7.071067811865E-1,0.E0,7.071067811865E-1));
#233=VECTOR('',#232,1.414213562373E1);
#234=CARTESIAN_POINT('',(-3.25E1,5.E0,-1.75E1));
#235=LINE('',#234,#233);
#236=CURVE_STYLE('',#99,POSITIVE_LENGTH_MEASURE(2.E-2),#67);
#237=PRESENTATION_STYLE_ASSIGNMENT((#236));
#238=STYLED_ITEM('',(#237),#235);
#239=DIRECTION('',(-1.E0,0.E0,0.E0));
#240=VECTOR('',#239,7.E1);
#241=CARTESIAN_POINT('',(3.75E1,5.E0,-1.75E1));
#242=LINE('',#241,#240);
#243=CURVE_STYLE('',#99,POSITIVE_LENGTH_MEASURE(2.E-2),#67);
#244=PRESENTATION_STYLE_ASSIGNMENT((#243));
#245=STYLED_ITEM('',(#244),#242);
#246=CARTESIAN_POINT('',(3.75E1,5.E0,-1.25E1));
#247=DIRECTION('',(0.E0,1.E0,0.E0));
#248=DIRECTION('',(1.E0,0.E0,0.E0));
#249=AXIS2_PLACEMENT_3D('',#246,#247,#248);
#251=CURVE_STYLE('',#99,POSITIVE_LENGTH_MEASURE(2.E-2),#67);
#252=PRESENTATION_STYLE_ASSIGNMENT((#251));
#253=STYLED_ITEM('',(#252),#250);
#254=DIRECTION('',(0.E0,0.E0,-1.E0));
#255=VECTOR('',#254,2.5E1);
#256=CARTESIAN_POINT('',(4.25E1,5.E0,1.25E1));
#257=LINE('',#256,#255);
#258=CURVE_STYLE('',#99,POSITIVE_LENGTH_MEASURE(2.E-2),#67);
#259=PRESENTATION_STYLE_ASSIGNMENT((#258));
#260=STYLED_ITEM('',(#259),#257);
#261=CARTESIAN_POINT('',(3.75E1,5.E0,1.25E1));
#262=DIRECTION('',(0.E0,1.E0,0.E0));
#263=DIRECTION('',(0.E0,0.E0,1.E0));
#264=AXIS2_PLACEMENT_3D('',#261,#262,#263);
#266=CURVE_STYLE('',#99,POSITIVE_LENGTH_MEASURE(2.E-2),#67);
#267=PRESENTATION_STYLE_ASSIGNMENT((#266));
#268=STYLED_ITEM('',(#267),#265);
#269=DIRECTION('',(1.E0,0.E0,0.E0));
#270=VECTOR('',#269,7.5E1);
#271=CARTESIAN_POINT('',(-3.75E1,5.E0,1.75E1));
#272=LINE('',#271,#270);
#273=CURVE_STYLE('',#99,POSITIVE_LENGTH_MEASURE(2.E-2),#67);
#274=PRESENTATION_STYLE_ASSIGNMENT((#273));
#275=STYLED_ITEM('',(#274),#272);
#276=CARTESIAN_POINT('',(-3.75E1,5.E0,1.25E1));
#277=DIRECTION('',(0.E0,1.E0,0.E0));
#278=DIRECTION('',(-1.E0,0.E0,0.E0));
#279=AXIS2_PLACEMENT_3D('',#276,#277,#278);
#281=CURVE_STYLE('',#99,POSITIVE_LENGTH_MEASURE(2.E-2),#67);
#282=PRESENTATION_STYLE_ASSIGNMENT((#281));
#283=STYLED_ITEM('',(#282),#280);
#284=DIRECTION('',(0.E0,0.E0,1.E0));
#285=VECTOR('',#284,2.E1);
#286=CARTESIAN_POINT('',(-4.25E1,5.E0,-7.5E0));
#287=LINE('',#286,#285);
#288=CURVE_STYLE('',#99,POSITIVE_LENGTH_MEASURE(2.E-2),#67);
#289=PRESENTATION_STYLE_ASSIGNMENT((#288));
#290=STYLED_ITEM('',(#289),#287);
#291=DIRECTION('',(0.E0,1.E0,0.E0));
#292=VECTOR('',#291,5.E0);
#293=CARTESIAN_POINT('',(-3.16E1,0.E0,7.5E0));
#294=LINE('',#293,#292);
#295=CURVE_STYLE('',#99,POSITIVE_LENGTH_MEASURE(2.E-2),#67);
#296=PRESENTATION_STYLE_ASSIGNMENT((#295));
#297=STYLED_ITEM('',(#296),#294);
#298=DIRECTION('',(0.E0,1.E0,0.E0));
#299=VECTOR('',#298,5.E0);
#300=CARTESIAN_POINT('',(-3.34E1,0.E0,7.5E0));
#301=LINE('',#300,#299);
#302=CURVE_STYLE('',#99,POSITIVE_LENGTH_MEASURE(2.E-2),#67);
#303=PRESENTATION_STYLE_ASSIGNMENT((#302));
#304=STYLED_ITEM('',(#303),#301);
#305=DIRECTION('',(0.E0,-1.E0,0.E0));
#306=VECTOR('',#305,5.E0);
#307=CARTESIAN_POINT('',(-3.25E1,5.E0,-1.75E1));
#308=LINE('',#307,#306);
#309=CURVE_STYLE('',#99,POSITIVE_LENGTH_MEASURE(2.E-2),#67);
#310=PRESENTATION_STYLE_ASSIGNMENT((#309));
#311=STYLED_ITEM('',(#310),#308);
#312=DIRECTION('',(0.E0,-1.E0,0.E0));
#313=VECTOR('',#312,5.E0);
#314=CARTESIAN_POINT('',(3.75E1,5.E0,-1.75E1));
#315=LINE('',#314,#313);
#316=CURVE_STYLE('',#99,POSITIVE_LENGTH_MEASURE(2.E-2),#67);
#317=PRESENTATION_STYLE_ASSIGNMENT((#316));
#318=STYLED_ITEM('',(#317),#315);
#319=DIRECTION('',(0.E0,-1.E0,0.E0));
#320=VECTOR('',#319,5.E0);
#321=CARTESIAN_POINT('',(4.25E1,5.E0,-1.25E1));
#322=LINE('',#321,#320);
#323=CURVE_STYLE('',#99,POSITIVE_LENGTH_MEASURE(2.E-2),#67);
#324=PRESENTATION_STYLE_ASSIGNMENT((#323));
#325=STYLED_ITEM('',(#324),#322);
#326=DIRECTION('',(0.E0,-1.E0,0.E0));
#327=VECTOR('',#326,5.E0);
#328=CARTESIAN_POINT('',(4.25E1,5.E0,1.25E1));
#329=LINE('',#328,#327);
#330=CURVE_STYLE('',#99,POSITIVE_LENGTH_MEASURE(2.E-2),#67);
#331=PRESENTATION_STYLE_ASSIGNMENT((#330));
#332=STYLED_ITEM('',(#331),#329);
#333=DIRECTION('',(0.E0,-1.E0,0.E0));
#334=VECTOR('',#333,5.E0);
#335=CARTESIAN_POINT('',(-3.75E1,5.E0,1.75E1));
#336=LINE('',#335,#334);
#337=CURVE_STYLE('',#99,POSITIVE_LENGTH_MEASURE(2.E-2),#67);
#338=PRESENTATION_STYLE_ASSIGNMENT((#337));
#339=STYLED_ITEM('',(#338),#336);
#340=DIRECTION('',(0.E0,-1.E0,0.E0));
#341=VECTOR('',#340,5.E0);
#342=CARTESIAN_POINT('',(3.75E1,5.E0,1.75E1));
#343=LINE('',#342,#341);
#344=CURVE_STYLE('',#99,POSITIVE_LENGTH_MEASURE(2.E-2),#67);
#345=PRESENTATION_STYLE_ASSIGNMENT((#344));
#346=STYLED_ITEM('',(#345),#343);
#347=DIRECTION('',(0.E0,-1.E0,0.E0));
#348=VECTOR('',#347,5.E0);
#349=CARTESIAN_POINT('',(-4.25E1,5.E0,-7.5E0));
#350=LINE('',#349,#348);
#351=CURVE_STYLE('',#99,POSITIVE_LENGTH_MEASURE(2.E-2),#67);
#352=PRESENTATION_STYLE_ASSIGNMENT((#351));
#353=STYLED_ITEM('',(#352),#350);
#354=DIRECTION('',(0.E0,-1.E0,0.E0));
#355=VECTOR('',#354,5.E0);
#356=CARTESIAN_POINT('',(-4.25E1,5.E0,1.25E1));
#357=LINE('',#356,#355);
#358=CURVE_STYLE('',#99,POSITIVE_LENGTH_MEASURE(2.E-2),#67);
#359=PRESENTATION_STYLE_ASSIGNMENT((#358));
#360=STYLED_ITEM('',(#359),#357);
#361=CARTESIAN_POINT('',(3.34E1,0.E0,-7.5E0));
#362=CARTESIAN_POINT('',(3.16E1,0.E0,-7.5E0));
#363=VERTEX_POINT('',#361);
#364=VERTEX_POINT('',#362);
#365=CARTESIAN_POINT('',(-3.16E1,0.E0,7.5E0));
#366=CARTESIAN_POINT('',(-3.34E1,0.E0,7.5E0));
#367=VERTEX_POINT('',#365);
#368=VERTEX_POINT('',#366);
#369=CARTESIAN_POINT('',(3.34E1,5.E0,-7.5E0));
#370=CARTESIAN_POINT('',(3.16E1,5.E0,-7.5E0));
#371=VERTEX_POINT('',#369);
#372=VERTEX_POINT('',#370);
#373=CARTESIAN_POINT('',(-3.16E1,5.E0,7.5E0));
#374=CARTESIAN_POINT('',(-3.34E1,5.E0,7.5E0));
#375=VERTEX_POINT('',#373);
#376=VERTEX_POINT('',#374);
#377=CARTESIAN_POINT('',(3.75E1,0.E0,-1.75E1));
#378=CARTESIAN_POINT('',(4.25E1,0.E0,-1.25E1));
#379=VERTEX_POINT('',#377);
#380=VERTEX_POINT('',#378);
#381=CARTESIAN_POINT('',(4.25E1,5.E0,-1.25E1));
#382=VERTEX_POINT('',#381);
#383=CARTESIAN_POINT('',(3.75E1,5.E0,-1.75E1));
#384=VERTEX_POINT('',#383);
#385=CARTESIAN_POINT('',(-3.75E1,0.E0,1.75E1));
#386=CARTESIAN_POINT('',(-4.25E1,0.E0,1.25E1));
#387=VERTEX_POINT('',#385);
#388=VERTEX_POINT('',#386);
#389=CARTESIAN_POINT('',(-4.25E1,5.E0,1.25E1));
#390=VERTEX_POINT('',#389);
#391=CARTESIAN_POINT('',(-3.75E1,5.E0,1.75E1));
#392=VERTEX_POINT('',#391);
#393=CARTESIAN_POINT('',(3.75E1,0.E0,1.75E1));
#394=VERTEX_POINT('',#393);
#395=CARTESIAN_POINT('',(4.25E1,0.E0,1.25E1));
#396=VERTEX_POINT('',#395);
#397=CARTESIAN_POINT('',(3.75E1,5.E0,1.75E1));
#398=VERTEX_POINT('',#397);
#399=CARTESIAN_POINT('',(4.25E1,5.E0,1.25E1));
#400=VERTEX_POINT('',#399);
#401=CARTESIAN_POINT('',(-4.25E1,0.E0,-7.5E0));
#402=CARTESIAN_POINT('',(-3.25E1,0.E0,-1.75E1));
#403=VERTEX_POINT('',#401);
#404=VERTEX_POINT('',#402);
#405=CARTESIAN_POINT('',(-3.25E1,5.E0,-1.75E1));
#406=VERTEX_POINT('',#405);
#407=CARTESIAN_POINT('',(-4.25E1,5.E0,-7.5E0));
#408=VERTEX_POINT('',#407);
#409=CARTESIAN_POINT('',(0.E0,0.E0,0.E0));
#410=DIRECTION('',(0.E0,1.E0,0.E0));
#411=DIRECTION('',(1.E0,0.E0,0.E0));
#412=AXIS2_PLACEMENT_3D('',#409,#410,#411);
#413=PLANE('',#412);
#415=ORIENTED_EDGE('',*,*,#414,.F.);
#417=ORIENTED_EDGE('',*,*,#416,.T.);
#419=ORIENTED_EDGE('',*,*,#418,.F.);
#421=ORIENTED_EDGE('',*,*,#420,.T.);
#423=ORIENTED_EDGE('',*,*,#422,.F.);
#425=ORIENTED_EDGE('',*,*,#424,.T.);
#427=ORIENTED_EDGE('',*,*,#426,.F.);
#429=ORIENTED_EDGE('',*,*,#428,.T.);
#430=EDGE_LOOP('',(#415,#417,#419,#421,#423,#425,#427,#429));
#431=FACE_OUTER_BOUND('',#430,.F.);
#433=ORIENTED_EDGE('',*,*,#432,.F.);
#435=ORIENTED_EDGE('',*,*,#434,.F.);
#436=EDGE_LOOP('',(#433,#435));
#437=FACE_BOUND('',#436,.F.);
#439=ORIENTED_EDGE('',*,*,#438,.F.);
#441=ORIENTED_EDGE('',*,*,#440,.F.);
#442=EDGE_LOOP('',(#439,#441));
#443=FACE_BOUND('',#442,.F.);
#445=CARTESIAN_POINT('',(3.25E1,0.E0,-7.5E0));
#446=DIRECTION('',(0.E0,1.E0,0.E0));
#447=DIRECTION('',(1.E0,0.E0,0.E0));
#448=AXIS2_PLACEMENT_3D('',#445,#446,#447);
#449=CYLINDRICAL_SURFACE('',#448,9.E-1);
#450=ORIENTED_EDGE('',*,*,#438,.T.);
#452=ORIENTED_EDGE('',*,*,#451,.T.);
#454=ORIENTED_EDGE('',*,*,#453,.F.);
#456=ORIENTED_EDGE('',*,*,#455,.F.);
#457=EDGE_LOOP('',(#450,#452,#454,#456));
#458=FACE_OUTER_BOUND('',#457,.F.);
#460=CARTESIAN_POINT('',(3.25E1,0.E0,-7.5E0));
#461=DIRECTION('',(0.E0,1.E0,0.E0));
#462=DIRECTION('',(1.E0,0.E0,0.E0));
#463=AXIS2_PLACEMENT_3D('',#460,#461,#462);
#464=CYLINDRICAL_SURFACE('',#463,9.E-1);
#465=ORIENTED_EDGE('',*,*,#440,.T.);
#466=ORIENTED_EDGE('',*,*,#455,.T.);
#468=ORIENTED_EDGE('',*,*,#467,.F.);
#469=ORIENTED_EDGE('',*,*,#451,.F.);
#470=EDGE_LOOP('',(#465,#466,#468,#469));
#471=FACE_OUTER_BOUND('',#470,.F.);
#473=CARTESIAN_POINT('',(0.E0,5.E0,0.E0));
#474=DIRECTION('',(0.E0,1.E0,0.E0));
#475=DIRECTION('',(1.E0,0.E0,0.E0));
#476=AXIS2_PLACEMENT_3D('',#473,#474,#475);
#477=PLANE('',#476);
#479=ORIENTED_EDGE('',*,*,#478,.F.);
#481=ORIENTED_EDGE('',*,*,#480,.F.);
#483=ORIENTED_EDGE('',*,*,#482,.F.);
#485=ORIENTED_EDGE('',*,*,#484,.F.);
#487=ORIENTED_EDGE('',*,*,#486,.F.);
#489=ORIENTED_EDGE('',*,*,#488,.F.);
#491=ORIENTED_EDGE('',*,*,#490,.F.);
#493=ORIENTED_EDGE('',*,*,#492,.F.);
#494=EDGE_LOOP('',(#479,#481,#483,#485,#487,#489,#491,#493));
#495=FACE_OUTER_BOUND('',#494,.F.);
#497=ORIENTED_EDGE('',*,*,#496,.T.);
#499=ORIENTED_EDGE('',*,*,#498,.T.);
#500=EDGE_LOOP('',(#497,#499));
#501=FACE_BOUND('',#500,.F.);
#502=ORIENTED_EDGE('',*,*,#453,.T.);
#503=ORIENTED_EDGE('',*,*,#467,.T.);
#504=EDGE_LOOP('',(#502,#503));
#505=FACE_BOUND('',#504,.F.);
#507=CARTESIAN_POINT('',(-3.25E1,0.E0,7.5E0));
#508=DIRECTION('',(0.E0,1.E0,0.E0));
#509=DIRECTION('',(1.E0,0.E0,0.E0));
#510=AXIS2_PLACEMENT_3D('',#507,#508,#509);
#511=CYLINDRICAL_SURFACE('',#510,9.E-1);
#512=ORIENTED_EDGE('',*,*,#432,.T.);
#514=ORIENTED_EDGE('',*,*,#513,.T.);
#515=ORIENTED_EDGE('',*,*,#496,.F.);
#517=ORIENTED_EDGE('',*,*,#516,.F.);
#518=EDGE_LOOP('',(#512,#514,#515,#517));
#519=FACE_OUTER_BOUND('',#518,.F.);
#521=CARTESIAN_POINT('',(-3.25E1,0.E0,7.5E0));
#522=DIRECTION('',(0.E0,1.E0,0.E0));
#523=DIRECTION('',(1.E0,0.E0,0.E0));
#524=AXIS2_PLACEMENT_3D('',#521,#522,#523);
#525=CYLINDRICAL_SURFACE('',#524,9.E-1);
#526=ORIENTED_EDGE('',*,*,#434,.T.);
#527=ORIENTED_EDGE('',*,*,#516,.T.);
#528=ORIENTED_EDGE('',*,*,#498,.F.);
#529=ORIENTED_EDGE('',*,*,#513,.F.);
#530=EDGE_LOOP('',(#526,#527,#528,#529));
#531=FACE_OUTER_BOUND('',#530,.F.);
#533=CARTESIAN_POINT('',(-3.75E1,2.5E0,-1.25E1));
#534=DIRECTION('',(-7.071067811865E-1,0.E0,-7.071067811865E-1));
#535=DIRECTION('',(7.071067811865E-1,0.E0,-7.071067811865E-1));
#536=AXIS2_PLACEMENT_3D('',#533,#534,#535);
#537=PLANE('',#536);
#538=ORIENTED_EDGE('',*,*,#414,.T.);
#540=ORIENTED_EDGE('',*,*,#539,.F.);
#541=ORIENTED_EDGE('',*,*,#478,.T.);
#543=ORIENTED_EDGE('',*,*,#542,.T.);
#544=EDGE_LOOP('',(#538,#540,#541,#543));
#545=FACE_OUTER_BOUND('',#544,.F.);
#547=CARTESIAN_POINT('',(4.25E1,0.E0,-1.75E1));
#548=DIRECTION('',(0.E0,0.E0,-1.E0));
#549=DIRECTION('',(-1.E0,0.E0,0.E0));
#550=AXIS2_PLACEMENT_3D('',#547,#548,#549);
#551=PLANE('',#550);
#552=ORIENTED_EDGE('',*,*,#539,.T.);
#553=ORIENTED_EDGE('',*,*,#428,.F.);
#555=ORIENTED_EDGE('',*,*,#554,.F.);
#556=ORIENTED_EDGE('',*,*,#480,.T.);
#557=EDGE_LOOP('',(#552,#553,#555,#556));
#558=FACE_OUTER_BOUND('',#557,.F.);
#560=CARTESIAN_POINT('',(3.75E1,1.1518E1,-1.25E1));
#561=DIRECTION('',(0.E0,-1.E0,0.E0));
#562=DIRECTION('',(0.E0,0.E0,-1.E0));
#563=AXIS2_PLACEMENT_3D('',#560,#561,#562);
#564=CYLINDRICAL_SURFACE('',#563,5.E0);
#565=ORIENTED_EDGE('',*,*,#426,.T.);
#567=ORIENTED_EDGE('',*,*,#566,.F.);
#568=ORIENTED_EDGE('',*,*,#482,.T.);
#569=ORIENTED_EDGE('',*,*,#554,.T.);
#570=EDGE_LOOP('',(#565,#567,#568,#569));
#571=FACE_OUTER_BOUND('',#570,.F.);
#573=CARTESIAN_POINT('',(4.25E1,0.E0,1.75E1));
#574=DIRECTION('',(1.E0,0.E0,0.E0));
#575=DIRECTION('',(0.E0,0.E0,-1.E0));
#576=AXIS2_PLACEMENT_3D('',#573,#574,#575);
#577=PLANE('',#576);
#578=ORIENTED_EDGE('',*,*,#566,.T.);
#579=ORIENTED_EDGE('',*,*,#424,.F.);
#581=ORIENTED_EDGE('',*,*,#580,.F.);
#582=ORIENTED_EDGE('',*,*,#484,.T.);
#583=EDGE_LOOP('',(#578,#579,#581,#582));
#584=FACE_OUTER_BOUND('',#583,.F.);
#586=CARTESIAN_POINT('',(3.75E1,1.1518E1,1.25E1));
#587=DIRECTION('',(0.E0,-1.E0,0.E0));
#588=DIRECTION('',(1.E0,0.E0,0.E0));
#589=AXIS2_PLACEMENT_3D('',#586,#587,#588);
#590=CYLINDRICAL_SURFACE('',#589,5.E0);
#591=ORIENTED_EDGE('',*,*,#422,.T.);
#593=ORIENTED_EDGE('',*,*,#592,.F.);
#594=ORIENTED_EDGE('',*,*,#486,.T.);
#595=ORIENTED_EDGE('',*,*,#580,.T.);
#596=EDGE_LOOP('',(#591,#593,#594,#595));
#597=FACE_OUTER_BOUND('',#596,.F.);
#599=CARTESIAN_POINT('',(-4.25E1,0.E0,1.75E1));
#600=DIRECTION('',(0.E0,0.E0,1.E0));
#601=DIRECTION('',(1.E0,0.E0,0.E0));
#602=AXIS2_PLACEMENT_3D('',#599,#600,#601);
#603=PLANE('',#602);
#605=ORIENTED_EDGE('',*,*,#604,.F.);
#606=ORIENTED_EDGE('',*,*,#488,.T.);
#607=ORIENTED_EDGE('',*,*,#592,.T.);
#608=ORIENTED_EDGE('',*,*,#420,.F.);
#609=EDGE_LOOP('',(#605,#606,#607,#608));
#610=FACE_OUTER_BOUND('',#609,.F.);
#612=CARTESIAN_POINT('',(-3.75E1,1.1518E1,1.25E1));
#613=DIRECTION('',(0.E0,-1.E0,0.E0));
#614=DIRECTION('',(0.E0,0.E0,1.E0));
#615=AXIS2_PLACEMENT_3D('',#612,#613,#614);
#616=CYLINDRICAL_SURFACE('',#615,5.E0);
#617=ORIENTED_EDGE('',*,*,#418,.T.);
#619=ORIENTED_EDGE('',*,*,#618,.F.);
#620=ORIENTED_EDGE('',*,*,#490,.T.);
#621=ORIENTED_EDGE('',*,*,#604,.T.);
#622=EDGE_LOOP('',(#617,#619,#620,#621));
#623=FACE_OUTER_BOUND('',#622,.F.);
#625=CARTESIAN_POINT('',(-4.25E1,0.E0,-1.75E1));
#626=DIRECTION('',(-1.E0,0.E0,0.E0));
#627=DIRECTION('',(0.E0,0.E0,1.E0));
#628=AXIS2_PLACEMENT_3D('',#625,#626,#627);
#629=PLANE('',#628);
#630=ORIENTED_EDGE('',*,*,#542,.F.);
#631=ORIENTED_EDGE('',*,*,#492,.T.);
#632=ORIENTED_EDGE('',*,*,#618,.T.);
#633=ORIENTED_EDGE('',*,*,#416,.F.);
#634=EDGE_LOOP('',(#630,#631,#632,#633));
#635=FACE_OUTER_BOUND('',#634,.F.);
#637=CLOSED_SHELL('',(#444,#459,#472,#506,#520,#532,#546,#559,#572,#585,#598,
#611,#624,#636));
#638=MANIFOLD_SOLID_BREP('',#637);
#639=FILL_AREA_STYLE_COLOUR('',#67);
#640=FILL_AREA_STYLE('',(#639));
#641=SURFACE_STYLE_FILL_AREA(#640);
#642=SURFACE_SIDE_STYLE('',(#641));
#643=SURFACE_STYLE_USAGE(.BOTH.,#642);
#644=PRESENTATION_STYLE_ASSIGNMENT((#643));
#93=STYLED_ITEM('',(#644),#638);
#645=PRESENTATION_LAYER_ASSIGNMENT('SOLIDE','',(#93));
#648=PLANE_ANGLE_MEASURE_WITH_UNIT(PLANE_ANGLE_MEASURE(1.745329251994E-2),#647);
#649=(CONVERSION_BASED_UNIT('DEGREE',#648)NAMED_UNIT(*)PLANE_ANGLE_UNIT());
#651=UNCERTAINTY_MEASURE_WITH_UNIT(LENGTH_MEASURE(9.205608080708E-3),#646,
'distance_accuracy_value',
'Maximum model space distance between geometric entities at asserted connectivities');
#654=MECHANICAL_DESIGN_GEOMETRIC_PRESENTATION_REPRESENTATION('',(#102,#110,#118,
#126,#133,#140,#148,#155,#163,#170,#178,#185,#192,#199,#207,#215,#223,#231,#238,
#245,#253,#260,#268,#275,#283,#290,#297,#304,#311,#318,#325,#332,#339,#346,#353,
#360,#93),#652);
#655=APPLICATION_CONTEXT('automotive_design');
#656=APPLICATION_PROTOCOL_DEFINITION('international standard',
'automotive_design',2001,#655);
#657=PRODUCT_DEFINITION_CONTEXT('part definition',#655,'design');
#658=PRODUCT_CONTEXT('',#655,'mechanical');
#659=PRODUCT('BCBBBV6_GABARIT','BCBBBV6_GABARIT','NOT SPECIFIED',(#658));
#660=PRODUCT_DEFINITION_FORMATION('6','LAST_VERSION',#659);
#668=DERIVED_UNIT_ELEMENT(#667,2.E0);
#669=DERIVED_UNIT((#668));
#670=MEASURE_REPRESENTATION_ITEM('surface area measure',AREA_MEASURE(
7.002700034674E3),#669);
#675=DERIVED_UNIT_ELEMENT(#674,3.E0);
#676=DERIVED_UNIT((#675));
#677=MEASURE_REPRESENTATION_ITEM('volume measure',VOLUME_MEASURE(
1.451907739384E4),#676);
#681=CARTESIAN_POINT('centre point',(5.979411786109E-1,2.5E0,
2.136626097169E-1));
#686=DERIVED_UNIT_ELEMENT(#685,2.E0);
#687=DERIVED_UNIT((#686));
#688=MEASURE_REPRESENTATION_ITEM('surface area measure',AREA_MEASURE(
7.002700034674E3),#687);
#693=DERIVED_UNIT_ELEMENT(#692,3.E0);
#694=DERIVED_UNIT((#693));
#695=MEASURE_REPRESENTATION_ITEM('volume measure',VOLUME_MEASURE(
1.451907739384E4),#694);
#699=CARTESIAN_POINT('centre point',(5.979411786109E-1,2.5E0,
2.136626097169E-1));
#704=PRODUCT_RELATED_PRODUCT_CATEGORY('part','',(#659));
#706=GENERAL_PROPERTY('','PTC_COMMON_NAME','user defined attribute');
#707=GENERAL_PROPERTY_ASSOCIATION('user defined attribute','',#706,#705);
#708=DESCRIPTIVE_REPRESENTATION_ITEM('PTC_COMMON_NAME',
'3dnvuv3_gabarit_inferieur.prt');
#712=GENERAL_PROPERTY('','MATIERE','user defined attribute');
#713=GENERAL_PROPERTY_ASSOCIATION('user defined attribute','',#712,#711);
#714=DESCRIPTIVE_REPRESENTATION_ITEM('MATIERE','ACIER_A60');
#718=GENERAL_PROPERTY('','FOURNISSEUR','user defined attribute');
#719=GENERAL_PROPERTY_ASSOCIATION('user defined attribute','',#718,#717);
#720=DESCRIPTIVE_REPRESENTATION_ITEM('FOURNISSEUR','hepia');
#724=GENERAL_PROPERTY('','PRIX','user defined attribute');
#725=GENERAL_PROPERTY_ASSOCIATION('user defined attribute','',#724,#723);
#726=VALUE_REPRESENTATION_ITEM('PRIX',NUMERIC_MEASURE(0.E0));
#729=DESCRIPTIVE_REPRESENTATION_ITEM('attribute description','Real Number');
#734=GENERAL_PROPERTY('','MASSE','user defined attribute');
#735=GENERAL_PROPERTY_ASSOCIATION('user defined attribute','',#734,#733);
#736=VALUE_REPRESENTATION_ITEM('MASSE',NUMERIC_MEASURE(7.87E-3));
#739=DESCRIPTIVE_REPRESENTATION_ITEM('attribute description','Real Number');
#744=GENERAL_PROPERTY('','MASSE_KG','user defined attribute');
#745=GENERAL_PROPERTY_ASSOCIATION('user defined attribute','',#744,#743);
#746=VALUE_REPRESENTATION_ITEM('MASSE_KG',NUMERIC_MEASURE(0.E0));
#749=DESCRIPTIVE_REPRESENTATION_ITEM('attribute description','Real Number');
#754=GENERAL_PROPERTY('','PTC_MATERIAL_NAME','user defined attribute');
#755=GENERAL_PROPERTY_ASSOCIATION('user defined attribute','',#754,#753);
#756=DESCRIPTIVE_REPRESENTATION_ITEM('PTC_MATERIAL_NAME','ACIER_A60');
#760=GENERAL_PROPERTY('','CONCEPTEUR','user defined attribute');
#761=GENERAL_PROPERTY_ASSOCIATION('user defined attribute','',#760,#759);
#762=DESCRIPTIVE_REPRESENTATION_ITEM('CONCEPTEUR','');
#766=GENERAL_PROPERTY('','DESSIN','user defined attribute');
#767=GENERAL_PROPERTY_ASSOCIATION('user defined attribute','',#766,#765);
#768=DESCRIPTIVE_REPRESENTATION_ITEM('DESSIN','gm2-g1-00.00');
#772=GENERAL_PROPERTY('','MFG_WP_MATERIAL','user defined attribute');
#773=GENERAL_PROPERTY_ASSOCIATION('user defined attribute','',#772,#771);
#774=DESCRIPTIVE_REPRESENTATION_ITEM('MFG_WP_MATERIAL','ACIER_A60');
#1=COLOUR_RGB('',0.E0,0.E0,4.7E-1);
#2=COLOUR_RGB('',0.E0,0.E0,6.E-1);
#3=COLOUR_RGB('',0.E0,0.E0,8.E-1);
#4=DRAUGHTING_PRE_DEFINED_COLOUR('blue');
#5=COLOUR_RGB('',0.E0,2.E-1,1.E0);
#6=COLOUR_RGB('',0.E0,4.E-1,0.E0);
#7=COLOUR_RGB('',0.E0,4.E-1,4.E-1);
#8=COLOUR_RGB('',0.E0,4.E-1,1.E0);
#9=COLOUR_RGB('',0.E0,5.3E-1,5.3E-1);
#10=COLOUR_RGB('',0.E0,6.E-1,0.E0);
#11=COLOUR_RGB('',0.E0,6.E-1,1.E0);
#12=COLOUR_RGB('',0.E0,8.E-1,0.E0);
#13=COLOUR_RGB('',0.E0,8.E-1,8.E-1);
#14=COLOUR_RGB('',0.E0,8.E-1,1.E0);
#15=DRAUGHTING_PRE_DEFINED_COLOUR('green');
#16=COLOUR_RGB('',0.E0,1.E0,2.E-1);
#17=COLOUR_RGB('',0.E0,1.E0,4.E-1);
#18=COLOUR_RGB('',0.E0,1.E0,6.E-1);
#19=COLOUR_RGB('',0.E0,1.E0,8.E-1);
#20=DRAUGHTING_PRE_DEFINED_COLOUR('cyan');
#21=COLOUR_RGB('',2.E-1,1.E0,0.E0);
#22=COLOUR_RGB('',2.E-1,1.E0,2.E-1);
#23=COLOUR_RGB('',2.E-1,1.E0,1.E0);
#24=COLOUR_RGB('',2.7E-1,0.E0,4.E-1);
#25=COLOUR_RGB('',2.7E-1,2.7E-1,0.E0);
#26=COLOUR_RGB('',2.7E-1,2.7E-1,1.E0);
#27=COLOUR_RGB('',3.3E-1,0.E0,0.E0);
#28=COLOUR_RGB('',3.3E-1,0.E0,5.3E-1);
#29=COLOUR_RGB('',4.E-1,0.E0,4.E-1);
#30=COLOUR_RGB('',4.E-1,0.E0,6.7E-1);
#31=COLOUR_RGB('',4.E-1,1.3E-1,0.E0);
#32=COLOUR_RGB('',4.E-1,4.E-1,0.E0);
#33=COLOUR_RGB('',4.E-1,4.E-1,1.E0);
#34=COLOUR_RGB('',4.E-1,1.E0,0.E0);
#35=COLOUR_RGB('',4.E-1,1.E0,4.E-1);
#36=COLOUR_RGB('',4.E-1,1.E0,1.E0);
#37=COLOUR_RGB('',4.7E-1,0.E0,0.E0);
#38=COLOUR_RGB('',4.7E-1,0.E0,8.7E-1);
#39=COLOUR_RGB('',4.7E-1,2.E-1,7.E-2);
#40=COLOUR_RGB('',4.7E-1,4.7E-1,4.7E-1);
#41=COLOUR_RGB('',5.3E-1,2.7E-1,1.3E-1);
#42=COLOUR_RGB('',6.E-1,2.E-1,1.E0);
#43=COLOUR_RGB('',6.E-1,3.3E-1,2.E-1);
#44=COLOUR_RGB('',6.E-1,6.E-1,0.E0);
#45=COLOUR_RGB('',6.E-1,6.E-1,1.E0);
#46=COLOUR_RGB('',6.E-1,1.E0,6.E-1);
#47=COLOUR_RGB('',6.E-1,1.E0,1.E0);
#48=COLOUR_RGB('',6.35294E-1,6.86275E-1,7.4902E-1);
#49=COLOUR_RGB('',6.7E-1,0.E0,0.E0);
#50=COLOUR_RGB('',6.7E-1,0.E0,5.3E-1);
#51=COLOUR_RGB('',6.7E-1,4.E-1,2.7E-1);
#52=COLOUR_RGB('',6.7E-1,4.E-1,1.E0);
#53=COLOUR_RGB('',6.7E-1,1.E0,0.E0);
#54=COLOUR_RGB('',7.3E-1,2.7E-1,1.E0);
#55=COLOUR_RGB('',7.3E-1,4.E-1,0.E0);
#56=COLOUR_RGB('',7.3E-1,4.7E-1,3.3E-1);
#57=COLOUR_RGB('',7.3E-1,7.3E-1,7.3E-1);
#58=COLOUR_RGB('',8.E-1,0.E0,8.E-1);
#59=COLOUR_RGB('',8.E-1,5.3E-1,4.E-1);
#60=COLOUR_RGB('',8.E-1,6.E-1,1.E0);
#61=COLOUR_RGB('',8.E-1,8.E-1,0.E0);
#62=COLOUR_RGB('',8.E-1,8.E-1,1.E0);
#63=COLOUR_RGB('',8.E-1,1.E0,8.E-1);
#64=COLOUR_RGB('',8.E-1,1.E0,1.E0);
#65=COLOUR_RGB('',8.7E-1,0.E0,0.E0);
#66=COLOUR_RGB('',8.7E-1,6.E-1,4.7E-1);
#67=COLOUR_RGB('',8.784E-1,9.49E-1,1.E0);
#68=COLOUR_RGB('',9.3E-1,1.E0,1.E0);
#69=DRAUGHTING_PRE_DEFINED_COLOUR('red');
#70=COLOUR_RGB('',1.E0,0.E0,2.7E-1);
#71=COLOUR_RGB('',1.E0,0.E0,4.7E-1);
#72=DRAUGHTING_PRE_DEFINED_COLOUR('magenta');
#73=COLOUR_RGB('',1.E0,2.E-1,1.E0);
#74=COLOUR_RGB('',1.E0,2.7E-1,0.E0);
#75=COLOUR_RGB('',1.E0,2.7E-1,2.7E-1);
#76=COLOUR_RGB('',1.E0,4.E-1,1.E0);
#77=COLOUR_RGB('',1.E0,4.7E-1,0.E0);
#78=COLOUR_RGB('',1.E0,4.7E-1,5.3E-1);
#79=COLOUR_RGB('',1.E0,6.E-1,1.E0);
#80=COLOUR_RGB('',1.E0,6.7E-1,0.E0);
#81=COLOUR_RGB('',1.E0,6.7E-1,6.7E-1);
#82=COLOUR_RGB('',1.E0,7.3E-1,5.3E-1);
#83=COLOUR_RGB('',1.E0,8.E-1,8.E-1);
#84=COLOUR_RGB('',1.E0,8.E-1,1.E0);
#85=COLOUR_RGB('',1.E0,8.7E-1,0.E0);
#86=COLOUR_RGB('',1.E0,9.3E-1,9.3E-1);
#87=DRAUGHTING_PRE_DEFINED_COLOUR('yellow');
#88=COLOUR_RGB('',1.E0,1.E0,1.3E-1);
#89=COLOUR_RGB('',1.E0,1.E0,3.3E-1);
#90=COLOUR_RGB('',1.E0,1.E0,5.3E-1);
#91=COLOUR_RGB('',1.E0,1.E0,7.3E-1);
#92=DRAUGHTING_PRE_DEFINED_COLOUR('white');
#98=CIRCLE('',#97,9.E-1);
#107=CIRCLE('',#106,9.E-1);
#115=CIRCLE('',#114,9.E-1);
#123=CIRCLE('',#122,9.E-1);
#145=CIRCLE('',#144,5.E0);
#160=CIRCLE('',#159,5.E0);
#175=CIRCLE('',#174,5.E0);
#204=CIRCLE('',#203,9.E-1);
#212=CIRCLE('',#211,9.E-1);
#220=CIRCLE('',#219,9.E-1);
#228=CIRCLE('',#227,9.E-1);
#250=CIRCLE('',#249,5.E0);
#265=CIRCLE('',#264,5.E0);
#280=CIRCLE('',#279,5.E0);
#414=EDGE_CURVE('',#403,#404,#130,.T.);
#416=EDGE_CURVE('',#403,#388,#137,.T.);
#418=EDGE_CURVE('',#387,#388,#145,.T.);
#420=EDGE_CURVE('',#387,#394,#152,.T.);
#422=EDGE_CURVE('',#396,#394,#160,.T.);
#424=EDGE_CURVE('',#396,#380,#167,.T.);
#426=EDGE_CURVE('',#379,#380,#175,.T.);
#428=EDGE_CURVE('',#379,#404,#182,.T.);
#432=EDGE_CURVE('',#367,#368,#115,.T.);
#434=EDGE_CURVE('',#368,#367,#123,.T.);
#438=EDGE_CURVE('',#363,#364,#98,.T.);
#440=EDGE_CURVE('',#364,#363,#107,.T.);
#444=ADVANCED_FACE('',(#431,#437,#443),#413,.F.);
#451=EDGE_CURVE('',#364,#372,#196,.T.);
#453=EDGE_CURVE('',#371,#372,#204,.T.);
#455=EDGE_CURVE('',#363,#371,#189,.T.);
#459=ADVANCED_FACE('',(#458),#449,.F.);
#467=EDGE_CURVE('',#372,#371,#212,.T.);
#472=ADVANCED_FACE('',(#471),#464,.F.);
#478=EDGE_CURVE('',#406,#408,#235,.T.);
#480=EDGE_CURVE('',#384,#406,#242,.T.);
#482=EDGE_CURVE('',#382,#384,#250,.T.);
#484=EDGE_CURVE('',#400,#382,#257,.T.);
#486=EDGE_CURVE('',#398,#400,#265,.T.);
#488=EDGE_CURVE('',#392,#398,#272,.T.);
#490=EDGE_CURVE('',#390,#392,#280,.T.);
#492=EDGE_CURVE('',#408,#390,#287,.T.);
#496=EDGE_CURVE('',#375,#376,#220,.T.);
#498=EDGE_CURVE('',#376,#375,#228,.T.);
#506=ADVANCED_FACE('',(#495,#501,#505),#477,.T.);
#513=EDGE_CURVE('',#368,#376,#301,.T.);
#516=EDGE_CURVE('',#367,#375,#294,.T.);
#520=ADVANCED_FACE('',(#519),#511,.F.);
#532=ADVANCED_FACE('',(#531),#525,.F.);
#539=EDGE_CURVE('',#406,#404,#308,.T.);
#542=EDGE_CURVE('',#408,#403,#350,.T.);
#546=ADVANCED_FACE('',(#545),#537,.T.);
#554=EDGE_CURVE('',#384,#379,#315,.T.);
#559=ADVANCED_FACE('',(#558),#551,.T.);
#566=EDGE_CURVE('',#382,#380,#322,.T.);
#572=ADVANCED_FACE('',(#571),#564,.T.);
#580=EDGE_CURVE('',#400,#396,#329,.T.);
#585=ADVANCED_FACE('',(#584),#577,.T.);
#592=EDGE_CURVE('',#398,#394,#343,.T.);
#598=ADVANCED_FACE('',(#597),#590,.T.);
#604=EDGE_CURVE('',#392,#387,#336,.T.);
#611=ADVANCED_FACE('',(#610),#603,.T.);
#618=EDGE_CURVE('',#390,#388,#357,.T.);
#624=ADVANCED_FACE('',(#623),#616,.T.);
#636=ADVANCED_FACE('',(#635),#629,.T.);
#646=(LENGTH_UNIT()NAMED_UNIT(*)SI_UNIT(.MILLI.,.METRE.));
#647=(NAMED_UNIT(*)PLANE_ANGLE_UNIT()SI_UNIT($,.RADIAN.));
#650=(NAMED_UNIT(*)SI_UNIT($,.STERADIAN.)SOLID_ANGLE_UNIT());
#652=(GEOMETRIC_REPRESENTATION_CONTEXT(3)GLOBAL_UNCERTAINTY_ASSIGNED_CONTEXT((
#651))GLOBAL_UNIT_ASSIGNED_CONTEXT((#646,#649,#650))REPRESENTATION_CONTEXT
('ID1','3'));
#653=ADVANCED_BREP_SHAPE_REPRESENTATION('',(#638),#652);
#661=PRODUCT_DEFINITION('part definition','',#660,#657);
#662=PRODUCT_DEFINITION_SHAPE('','SHAPE FOR BCBBBV6_GABARIT.',#661);
#663=SHAPE_ASPECT('','solid data associated with BCBBBV6_GABARIT',#662,.F.);
#664=PROPERTY_DEFINITION('',
'shape for solid data with which properties are associated',#663);
#665=SHAPE_REPRESENTATION('',(#638),#652);
#666=SHAPE_DEFINITION_REPRESENTATION(#664,#665);
#667=(LENGTH_UNIT()NAMED_UNIT(*)SI_UNIT(.MILLI.,.METRE.));
#671=PROPERTY_DEFINITION('geometric validation property',
'area of BCBBBV6_GABARIT',#663);
#672=REPRESENTATION('surface area',(#670),#652);
#673=PROPERTY_DEFINITION_REPRESENTATION(#671,#672);
#674=(LENGTH_UNIT()NAMED_UNIT(*)SI_UNIT(.MILLI.,.METRE.));
#678=PROPERTY_DEFINITION('geometric validation property',
'volume of BCBBBV6_GABARIT',#663);
#679=REPRESENTATION('volume',(#677),#652);
#680=PROPERTY_DEFINITION_REPRESENTATION(#678,#679);
#682=PROPERTY_DEFINITION('geometric validation property',
'centroid of BCBBBV6_GABARIT',#663);
#683=REPRESENTATION('centroid',(#681),#652);
#684=PROPERTY_DEFINITION_REPRESENTATION(#682,#683);
#685=(LENGTH_UNIT()NAMED_UNIT(*)SI_UNIT(.MILLI.,.METRE.));
#689=PROPERTY_DEFINITION('geometric validation property',
'area of BCBBBV6_GABARIT',#662);
#690=REPRESENTATION('surface area',(#688),#652);
#691=PROPERTY_DEFINITION_REPRESENTATION(#689,#690);
#692=(LENGTH_UNIT()NAMED_UNIT(*)SI_UNIT(.MILLI.,.METRE.));
#696=PROPERTY_DEFINITION('geometric validation property',
'volume of BCBBBV6_GABARIT',#662);
#697=REPRESENTATION('volume',(#695),#652);
#698=PROPERTY_DEFINITION_REPRESENTATION(#696,#697);
#700=PROPERTY_DEFINITION('geometric validation property',
'centroid of BCBBBV6_GABARIT',#662);
#701=REPRESENTATION('centroid',(#699),#652);
#702=PROPERTY_DEFINITION_REPRESENTATION(#700,#701);
#703=SHAPE_DEFINITION_REPRESENTATION(#662,#653);
#705=PROPERTY_DEFINITION('PTC_COMMON_NAME','user defined attribute',#661);
#709=REPRESENTATION('',(#708),#652);
#710=PROPERTY_DEFINITION_REPRESENTATION(#705,#709);
#711=PROPERTY_DEFINITION('MATIERE','user defined attribute',#661);
#715=REPRESENTATION('',(#714),#652);
#716=PROPERTY_DEFINITION_REPRESENTATION(#711,#715);
#717=PROPERTY_DEFINITION('FOURNISSEUR','user defined attribute',#661);
#721=REPRESENTATION('',(#720),#652);
#722=PROPERTY_DEFINITION_REPRESENTATION(#717,#721);
#723=PROPERTY_DEFINITION('PRIX','user defined attribute',#661);
#727=REPRESENTATION('',(#726),#652);
#728=PROPERTY_DEFINITION_REPRESENTATION(#723,#727);
#730=REPRESENTATION('',(#729),#652);
#731=PROPERTY_DEFINITION('attribute type designation','Real Number',#724);
#732=PROPERTY_DEFINITION_REPRESENTATION(#731,#730);
#733=PROPERTY_DEFINITION('MASSE','user defined attribute',#661);
#737=REPRESENTATION('',(#736),#652);
#738=PROPERTY_DEFINITION_REPRESENTATION(#733,#737);
#740=REPRESENTATION('',(#739),#652);
#741=PROPERTY_DEFINITION('attribute type designation','Real Number',#734);
#742=PROPERTY_DEFINITION_REPRESENTATION(#741,#740);
#743=PROPERTY_DEFINITION('MASSE_KG','user defined attribute',#661);
#747=REPRESENTATION('',(#746),#652);
#748=PROPERTY_DEFINITION_REPRESENTATION(#743,#747);
#750=REPRESENTATION('',(#749),#652);
#751=PROPERTY_DEFINITION('attribute type designation','Real Number',#744);
#752=PROPERTY_DEFINITION_REPRESENTATION(#751,#750);
#753=PROPERTY_DEFINITION('PTC_MATERIAL_NAME','user defined attribute',#661);
#757=REPRESENTATION('',(#756),#652);
#758=PROPERTY_DEFINITION_REPRESENTATION(#753,#757);
#759=PROPERTY_DEFINITION('CONCEPTEUR','user defined attribute',#661);
#763=REPRESENTATION('',(#762),#652);
#764=PROPERTY_DEFINITION_REPRESENTATION(#759,#763);
#765=PROPERTY_DEFINITION('DESSIN','user defined attribute',#661);
#769=REPRESENTATION('',(#768),#652);
#770=PROPERTY_DEFINITION_REPRESENTATION(#765,#769);
#771=PROPERTY_DEFINITION('MFG_WP_MATERIAL','user defined attribute',#661);
#775=REPRESENTATION('',(#774),#652);
#776=PROPERTY_DEFINITION_REPRESENTATION(#771,#775);
ENDSEC;
END-ISO-10303-21;
