# Supplementary material
Source: MDPI journal article supplement (https://www.mdpi.com/2076-3417/11/12/5584)
Supplement: s1 [file s1 › hepia_bbb_top.stp]

ISO-10303-21;
HEADER;
FILE_DESCRIPTION((''),'2;1');
FILE_NAME('BCBBBV6_SUPPORT_LUER','2020-11-24T11:12:16',('loris.gomezbai'),(''),
'CREO PARAMETRIC BY PTC INC, 2016390','CREO PARAMETRIC BY PTC INC, 2016390','');
FILE_SCHEMA(('AUTOMOTIVE_DESIGN { 1 0 10303 214 1 1 1 1 }'));
ENDSEC;
DATA;
#94=CARTESIAN_POINT('',(-3.15E1,0.E0,0.E0));
#95=DIRECTION('',(0.E0,1.E0,0.E0));
#96=DIRECTION('',(1.E0,0.E0,0.E0));
#97=AXIS2_PLACEMENT_3D('',#94,#95,#96);
#99=DRAUGHTING_PRE_DEFINED_CURVE_FONT('continuous');
#100=CURVE_STYLE('',#99,POSITIVE_LENGTH_MEASURE(2.E-2),#67);
#101=PRESENTATION_STYLE_ASSIGNMENT((#100));
#102=STYLED_ITEM('',(#101),#98);
#103=CARTESIAN_POINT('',(-3.15E1,0.E0,0.E0));
#104=DIRECTION('',(0.E0,1.E0,0.E0));
#105=DIRECTION('',(-1.E0,0.E0,0.E0));
#106=AXIS2_PLACEMENT_3D('',#103,#104,#105);
#108=CURVE_STYLE('',#99,POSITIVE_LENGTH_MEASURE(2.E-2),#67);
#109=PRESENTATION_STYLE_ASSIGNMENT((#108));
#110=STYLED_ITEM('',(#109),#107);
#111=CARTESIAN_POINT('',(3.15E1,0.E0,0.E0));
#112=DIRECTION('',(0.E0,1.E0,0.E0));
#113=DIRECTION('',(1.E0,0.E0,0.E0));
#114=AXIS2_PLACEMENT_3D('',#111,#112,#113);
#116=CURVE_STYLE('',#99,POSITIVE_LENGTH_MEASURE(2.E-2),#67);
#117=PRESENTATION_STYLE_ASSIGNMENT((#116));
#118=STYLED_ITEM('',(#117),#115);
#119=CARTESIAN_POINT('',(3.15E1,0.E0,0.E0));
#120=DIRECTION('',(0.E0,1.E0,0.E0));
#121=DIRECTION('',(-1.E0,0.E0,0.E0));
#122=AXIS2_PLACEMENT_3D('',#119,#120,#121);
#124=CURVE_STYLE('',#99,POSITIVE_LENGTH_MEASURE(2.E-2),#67);
#125=PRESENTATION_STYLE_ASSIGNMENT((#124));
#126=STYLED_ITEM('',(#125),#123);
#127=CARTESIAN_POINT('',(-2.15E1,0.E0,-7.5E0));
#128=DIRECTION('',(0.E0,1.E0,0.E0));
#129=DIRECTION('',(1.E0,0.E0,0.E0));
#130=AXIS2_PLACEMENT_3D('',#127,#128,#129);
#132=CURVE_STYLE('',#99,POSITIVE_LENGTH_MEASURE(2.E-2),#67);
#133=PRESENTATION_STYLE_ASSIGNMENT((#132));
#134=STYLED_ITEM('',(#133),#131);
#135=CARTESIAN_POINT('',(-2.15E1,0.E0,-7.5E0));
#136=DIRECTION('',(0.E0,1.E0,0.E0));
#137=DIRECTION('',(-1.E0,0.E0,0.E0));
#138=AXIS2_PLACEMENT_3D('',#135,#136,#137);
#140=CURVE_STYLE('',#99,POSITIVE_LENGTH_MEASURE(2.E-2),#67);
#141=PRESENTATION_STYLE_ASSIGNMENT((#140));
#142=STYLED_ITEM('',(#141),#139);
#143=CARTESIAN_POINT('',(2.15E1,0.E0,7.5E0));
#144=DIRECTION('',(0.E0,1.E0,0.E0));
#145=DIRECTION('',(1.E0,0.E0,0.E0));
#146=AXIS2_PLACEMENT_3D('',#143,#144,#145);
#148=CURVE_STYLE('',#99,POSITIVE_LENGTH_MEASURE(2.E-2),#67);
#149=PRESENTATION_STYLE_ASSIGNMENT((#148));
#150=STYLED_ITEM('',(#149),#147);
#151=CARTESIAN_POINT('',(2.15E1,0.E0,7.5E0));
#152=DIRECTION('',(0.E0,1.E0,0.E0));
#153=DIRECTION('',(-1.E0,0.E0,0.E0));
#154=AXIS2_PLACEMENT_3D('',#151,#152,#153);
#156=CURVE_STYLE('',#99,POSITIVE_LENGTH_MEASURE(2.E-2),#67);
#157=PRESENTATION_STYLE_ASSIGNMENT((#156));
#158=STYLED_ITEM('',(#157),#155);
#159=CARTESIAN_POINT('',(3.25E1,0.E0,-7.5E0));
#160=DIRECTION('',(0.E0,1.E0,0.E0));
#161=DIRECTION('',(1.E0,0.E0,0.E0));
#162=AXIS2_PLACEMENT_3D('',#159,#160,#161);
#164=CURVE_STYLE('',#99,POSITIVE_LENGTH_MEASURE(2.E-2),#67);
#165=PRESENTATION_STYLE_ASSIGNMENT((#164));
#166=STYLED_ITEM('',(#165),#163);
#167=CARTESIAN_POINT('',(3.25E1,0.E0,-7.5E0));
#168=DIRECTION('',(0.E0,1.E0,0.E0));
#169=DIRECTION('',(-1.E0,0.E0,0.E0));
#170=AXIS2_PLACEMENT_3D('',#167,#168,#169);
#172=CURVE_STYLE('',#99,POSITIVE_LENGTH_MEASURE(2.E-2),#67);
#173=PRESENTATION_STYLE_ASSIGNMENT((#172));
#174=STYLED_ITEM('',(#173),#171);
#175=CARTESIAN_POINT('',(-3.25E1,0.E0,7.5E0));
#176=DIRECTION('',(0.E0,1.E0,0.E0));
#177=DIRECTION('',(1.E0,0.E0,0.E0));
#178=AXIS2_PLACEMENT_3D('',#175,#176,#177);
#180=CURVE_STYLE('',#99,POSITIVE_LENGTH_MEASURE(2.E-2),#67);
#181=PRESENTATION_STYLE_ASSIGNMENT((#180));
#182=STYLED_ITEM('',(#181),#179);
#183=CARTESIAN_POINT('',(-3.25E1,0.E0,7.5E0));
#184=DIRECTION('',(0.E0,1.E0,0.E0));
#185=DIRECTION('',(-1.E0,0.E0,0.E0));
#186=AXIS2_PLACEMENT_3D('',#183,#184,#185);
#188=CURVE_STYLE('',#99,POSITIVE_LENGTH_MEASURE(2.E-2),#67);
#189=PRESENTATION_STYLE_ASSIGNMENT((#188));
#190=STYLED_ITEM('',(#189),#187);
#191=DIRECTION('',(7.071067811865E-1,0.E0,-7.071067811865E-1));
#192=VECTOR('',#191,7.071067811865E0);
#193=CARTESIAN_POINT('',(-3.75E1,0.E0,-7.5E0));
#194=LINE('',#193,#192);
#195=CURVE_STYLE('',#99,POSITIVE_LENGTH_MEASURE(2.E-2),#67);
#196=PRESENTATION_STYLE_ASSIGNMENT((#195));
#197=STYLED_ITEM('',(#196),#194);
#198=DIRECTION('',(0.E0,0.E0,1.E0));
#199=VECTOR('',#198,2.E1);
#200=CARTESIAN_POINT('',(-3.75E1,0.E0,-7.5E0));
#201=LINE('',#200,#199);
#202=CURVE_STYLE('',#99,POSITIVE_LENGTH_MEASURE(2.E-2),#67);
#203=PRESENTATION_STYLE_ASSIGNMENT((#202));
#204=STYLED_ITEM('',(#203),#201);
#205=DIRECTION('',(1.E0,0.E0,0.E0));
#206=VECTOR('',#205,7.5E1);
#207=CARTESIAN_POINT('',(-3.75E1,0.E0,1.25E1));
#208=LINE('',#207,#206);
#209=CURVE_STYLE('',#99,POSITIVE_LENGTH_MEASURE(2.E-2),#67);
#210=PRESENTATION_STYLE_ASSIGNMENT((#209));
#211=STYLED_ITEM('',(#210),#208);
#212=DIRECTION('',(0.E0,0.E0,-1.E0));
#213=VECTOR('',#212,2.5E1);
#214=CARTESIAN_POINT('',(3.75E1,0.E0,1.25E1));
#215=LINE('',#214,#213);
#216=CURVE_STYLE('',#99,POSITIVE_LENGTH_MEASURE(2.E-2),#67);
#217=PRESENTATION_STYLE_ASSIGNMENT((#216));
#218=STYLED_ITEM('',(#217),#215);
#219=DIRECTION('',(-1.E0,0.E0,0.E0));
#220=VECTOR('',#219,7.E1);
#221=CARTESIAN_POINT('',(3.75E1,0.E0,-1.25E1));
#222=LINE('',#221,#220);
#223=CURVE_STYLE('',#99,POSITIVE_LENGTH_MEASURE(2.E-2),#67);
#224=PRESENTATION_STYLE_ASSIGNMENT((#223));
#225=STYLED_ITEM('',(#224),#222);
#226=DIRECTION('',(0.E0,1.E0,0.E0));
#227=VECTOR('',#226,3.E0);
#228=CARTESIAN_POINT('',(-2.925E1,0.E0,0.E0));
#229=LINE('',#228,#227);
#230=CURVE_STYLE('',#99,POSITIVE_LENGTH_MEASURE(2.E-2),#67);
#231=PRESENTATION_STYLE_ASSIGNMENT((#230));
#232=STYLED_ITEM('',(#231),#229);
#233=DIRECTION('',(0.E0,1.E0,0.E0));
#234=VECTOR('',#233,3.E0);
#235=CARTESIAN_POINT('',(-3.375E1,0.E0,0.E0));
#236=LINE('',#235,#234);
#237=CURVE_STYLE('',#99,POSITIVE_LENGTH_MEASURE(2.E-2),#67);
#238=PRESENTATION_STYLE_ASSIGNMENT((#237));
#239=STYLED_ITEM('',(#238),#236);
#240=CARTESIAN_POINT('',(-3.15E1,3.E0,0.E0));
#241=DIRECTION('',(0.E0,1.E0,0.E0));
#242=DIRECTION('',(1.E0,0.E0,0.E0));
#243=AXIS2_PLACEMENT_3D('',#240,#241,#242);
#245=CURVE_STYLE('',#99,POSITIVE_LENGTH_MEASURE(2.E-2),#67);
#246=PRESENTATION_STYLE_ASSIGNMENT((#245));
#247=STYLED_ITEM('',(#246),#244);
#248=CARTESIAN_POINT('',(-3.15E1,3.E0,0.E0));
#249=DIRECTION('',(0.E0,1.E0,0.E0));
#250=DIRECTION('',(-1.E0,0.E0,0.E0));
#251=AXIS2_PLACEMENT_3D('',#248,#249,#250);
#253=CURVE_STYLE('',#99,POSITIVE_LENGTH_MEASURE(2.E-2),#67);
#254=PRESENTATION_STYLE_ASSIGNMENT((#253));
#255=STYLED_ITEM('',(#254),#252);
#256=CARTESIAN_POINT('',(3.15E1,3.E0,0.E0));
#257=DIRECTION('',(0.E0,1.E0,0.E0));
#258=DIRECTION('',(1.E0,0.E0,0.E0));
#259=AXIS2_PLACEMENT_3D('',#256,#257,#258);
#261=CURVE_STYLE('',#99,POSITIVE_LENGTH_MEASURE(2.E-2),#67);
#262=PRESENTATION_STYLE_ASSIGNMENT((#261));
#263=STYLED_ITEM('',(#262),#260);
#264=CARTESIAN_POINT('',(3.15E1,3.E0,0.E0));
#265=DIRECTION('',(0.E0,1.E0,0.E0));
#266=DIRECTION('',(-1.E0,0.E0,0.E0));
#267=AXIS2_PLACEMENT_3D('',#264,#265,#266);
#269=CURVE_STYLE('',#99,POSITIVE_LENGTH_MEASURE(2.E-2),#67);
#270=PRESENTATION_STYLE_ASSIGNMENT((#269));
#271=STYLED_ITEM('',(#270),#268);
#272=CARTESIAN_POINT('',(-2.15E1,3.E0,-7.5E0));
#273=DIRECTION('',(0.E0,1.E0,0.E0));
#274=DIRECTION('',(1.E0,0.E0,0.E0));
#275=AXIS2_PLACEMENT_3D('',#272,#273,#274);
#277=CURVE_STYLE('',#99,POSITIVE_LENGTH_MEASURE(2.E-2),#67);
#278=PRESENTATION_STYLE_ASSIGNMENT((#277));
#279=STYLED_ITEM('',(#278),#276);
#280=CARTESIAN_POINT('',(-2.15E1,3.E0,-7.5E0));
#281=DIRECTION('',(0.E0,1.E0,0.E0));
#282=DIRECTION('',(-1.E0,0.E0,0.E0));
#283=AXIS2_PLACEMENT_3D('',#280,#281,#282);
#285=CURVE_STYLE('',#99,POSITIVE_LENGTH_MEASURE(2.E-2),#67);
#286=PRESENTATION_STYLE_ASSIGNMENT((#285));
#287=STYLED_ITEM('',(#286),#284);
#288=CARTESIAN_POINT('',(2.15E1,3.E0,7.5E0));
#289=DIRECTION('',(0.E0,1.E0,0.E0));
#290=DIRECTION('',(1.E0,0.E0,0.E0));
#291=AXIS2_PLACEMENT_3D('',#288,#289,#290);
#293=CURVE_STYLE('',#99,POSITIVE_LENGTH_MEASURE(2.E-2),#67);
#294=PRESENTATION_STYLE_ASSIGNMENT((#293));
#295=STYLED_ITEM('',(#294),#292);
#296=CARTESIAN_POINT('',(2.15E1,3.E0,7.5E0));
#297=DIRECTION('',(0.E0,1.E0,0.E0));
#298=DIRECTION('',(-1.E0,0.E0,0.E0));
#299=AXIS2_PLACEMENT_3D('',#296,#297,#298);
#301=CURVE_STYLE('',#99,POSITIVE_LENGTH_MEASURE(2.E-2),#67);
#302=PRESENTATION_STYLE_ASSIGNMENT((#301));
#303=STYLED_ITEM('',(#302),#300);
#304=CARTESIAN_POINT('',(3.25E1,3.E0,-7.5E0));
#305=DIRECTION('',(0.E0,1.E0,0.E0));
#306=DIRECTION('',(1.E0,0.E0,0.E0));
#307=AXIS2_PLACEMENT_3D('',#304,#305,#306);
#309=CURVE_STYLE('',#99,POSITIVE_LENGTH_MEASURE(2.E-2),#67);
#310=PRESENTATION_STYLE_ASSIGNMENT((#309));
#311=STYLED_ITEM('',(#310),#308);
#312=CARTESIAN_POINT('',(3.25E1,3.E0,-7.5E0));
#313=DIRECTION('',(0.E0,1.E0,0.E0));
#314=DIRECTION('',(-1.E0,0.E0,0.E0));
#315=AXIS2_PLACEMENT_3D('',#312,#313,#314);
#317=CURVE_STYLE('',#99,POSITIVE_LENGTH_MEASURE(2.E-2),#67);
#318=PRESENTATION_STYLE_ASSIGNMENT((#317));
#319=STYLED_ITEM('',(#318),#316);
#320=CARTESIAN_POINT('',(-3.25E1,3.E0,7.5E0));
#321=DIRECTION('',(0.E0,1.E0,0.E0));
#322=DIRECTION('',(1.E0,0.E0,0.E0));
#323=AXIS2_PLACEMENT_3D('',#320,#321,#322);
#325=CURVE_STYLE('',#99,POSITIVE_LENGTH_MEASURE(2.E-2),#67);
#326=PRESENTATION_STYLE_ASSIGNMENT((#325));
#327=STYLED_ITEM('',(#326),#324);
#328=CARTESIAN_POINT('',(-3.25E1,3.E0,7.5E0));
#329=DIRECTION('',(0.E0,1.E0,0.E0));
#330=DIRECTION('',(-1.E0,0.E0,0.E0));
#331=AXIS2_PLACEMENT_3D('',#328,#329,#330);
#333=CURVE_STYLE('',#99,POSITIVE_LENGTH_MEASURE(2.E-2),#67);
#334=PRESENTATION_STYLE_ASSIGNMENT((#333));
#335=STYLED_ITEM('',(#334),#332);
#336=DIRECTION('',(-7.071067811865E-1,0.E0,7.071067811865E-1));
#337=VECTOR('',#336,7.071067811865E0);
#338=CARTESIAN_POINT('',(-3.25E1,3.E0,-1.25E1));
#339=LINE('',#338,#337);
#340=CURVE_STYLE('',#99,POSITIVE_LENGTH_MEASURE(2.E-2),#67);
#341=PRESENTATION_STYLE_ASSIGNMENT((#340));
#342=STYLED_ITEM('',(#341),#339);
#343=DIRECTION('',(-1.E0,0.E0,0.E0));
#344=VECTOR('',#343,7.E1);
#345=CARTESIAN_POINT('',(3.75E1,3.E0,-1.25E1));
#346=LINE('',#345,#344);
#347=CURVE_STYLE('',#99,POSITIVE_LENGTH_MEASURE(2.E-2),#67);
#348=PRESENTATION_STYLE_ASSIGNMENT((#347));
#349=STYLED_ITEM('',(#348),#346);
#350=DIRECTION('',(0.E0,0.E0,-1.E0));
#351=VECTOR('',#350,2.5E1);
#352=CARTESIAN_POINT('',(3.75E1,3.E0,1.25E1));
#353=LINE('',#352,#351);
#354=CURVE_STYLE('',#99,POSITIVE_LENGTH_MEASURE(2.E-2),#67);
#355=PRESENTATION_STYLE_ASSIGNMENT((#354));
#356=STYLED_ITEM('',(#355),#353);
#357=DIRECTION('',(1.E0,0.E0,0.E0));
#358=VECTOR('',#357,7.5E1);
#359=CARTESIAN_POINT('',(-3.75E1,3.E0,1.25E1));
#360=LINE('',#359,#358);
#361=CURVE_STYLE('',#99,POSITIVE_LENGTH_MEASURE(2.E-2),#67);
#362=PRESENTATION_STYLE_ASSIGNMENT((#361));
#363=STYLED_ITEM('',(#362),#360);
#364=DIRECTION('',(0.E0,0.E0,1.E0));
#365=VECTOR('',#364,2.E1);
#366=CARTESIAN_POINT('',(-3.75E1,3.E0,-7.5E0));
#367=LINE('',#366,#365);
#368=CURVE_STYLE('',#99,POSITIVE_LENGTH_MEASURE(2.E-2),#67);
#369=PRESENTATION_STYLE_ASSIGNMENT((#368));
#370=STYLED_ITEM('',(#369),#367);
#371=DIRECTION('',(0.E0,1.E0,0.E0));
#372=VECTOR('',#371,3.E0);
#373=CARTESIAN_POINT('',(3.375E1,0.E0,0.E0));
#374=LINE('',#373,#372);
#375=CURVE_STYLE('',#99,POSITIVE_LENGTH_MEASURE(2.E-2),#67);
#376=PRESENTATION_STYLE_ASSIGNMENT((#375));
#377=STYLED_ITEM('',(#376),#374);
#378=DIRECTION('',(0.E0,1.E0,0.E0));
#379=VECTOR('',#378,3.E0);
#380=CARTESIAN_POINT('',(2.925E1,0.E0,0.E0));
#381=LINE('',#380,#379);
#382=CURVE_STYLE('',#99,POSITIVE_LENGTH_MEASURE(2.E-2),#67);
#383=PRESENTATION_STYLE_ASSIGNMENT((#382));
#384=STYLED_ITEM('',(#383),#381);
#385=DIRECTION('',(0.E0,1.E0,0.E0));
#386=VECTOR('',#385,3.E0);
#387=CARTESIAN_POINT('',(-1.925E1,0.E0,-7.5E0));
#388=LINE('',#387,#386);
#389=CURVE_STYLE('',#99,POSITIVE_LENGTH_MEASURE(2.E-2),#67);
#390=PRESENTATION_STYLE_ASSIGNMENT((#389));
#391=STYLED_ITEM('',(#390),#388);
#392=DIRECTION('',(0.E0,1.E0,0.E0));
#393=VECTOR('',#392,3.E0);
#394=CARTESIAN_POINT('',(-2.375E1,0.E0,-7.5E0));
#395=LINE('',#394,#393);
#396=CURVE_STYLE('',#99,POSITIVE_LENGTH_MEASURE(2.E-2),#67);
#397=PRESENTATION_STYLE_ASSIGNMENT((#396));
#398=STYLED_ITEM('',(#397),#395);
#399=DIRECTION('',(0.E0,1.E0,0.E0));
#400=VECTOR('',#399,3.E0);
#401=CARTESIAN_POINT('',(2.375E1,0.E0,7.5E0));
#402=LINE('',#401,#400);
#403=CURVE_STYLE('',#99,POSITIVE_LENGTH_MEASURE(2.E-2),#67);
#404=PRESENTATION_STYLE_ASSIGNMENT((#403));
#405=STYLED_ITEM('',(#404),#402);
#406=DIRECTION('',(0.E0,1.E0,0.E0));
#407=VECTOR('',#406,3.E0);
#408=CARTESIAN_POINT('',(1.925E1,0.E0,7.5E0));
#409=LINE('',#408,#407);
#410=CURVE_STYLE('',#99,POSITIVE_LENGTH_MEASURE(2.E-2),#67);
#411=PRESENTATION_STYLE_ASSIGNMENT((#410));
#412=STYLED_ITEM('',(#411),#409);
#413=DIRECTION('',(0.E0,1.E0,0.E0));
#414=VECTOR('',#413,3.E0);
#415=CARTESIAN_POINT('',(3.35E1,0.E0,-7.5E0));
#416=LINE('',#415,#414);
#417=CURVE_STYLE('',#99,POSITIVE_LENGTH_MEASURE(2.E-2),#67);
#418=PRESENTATION_STYLE_ASSIGNMENT((#417));
#419=STYLED_ITEM('',(#418),#416);
#420=DIRECTION('',(0.E0,1.E0,0.E0));
#421=VECTOR('',#420,3.E0);
#422=CARTESIAN_POINT('',(3.15E1,0.E0,-7.5E0));
#423=LINE('',#422,#421);
#424=CURVE_STYLE('',#99,POSITIVE_LENGTH_MEASURE(2.E-2),#67);
#425=PRESENTATION_STYLE_ASSIGNMENT((#424));
#426=STYLED_ITEM('',(#425),#423);
#427=DIRECTION('',(0.E0,1.E0,0.E0));
#428=VECTOR('',#427,3.E0);
#429=CARTESIAN_POINT('',(-3.15E1,0.E0,7.5E0));
#430=LINE('',#429,#428);
#431=CURVE_STYLE('',#99,POSITIVE_LENGTH_MEASURE(2.E-2),#67);
#432=PRESENTATION_STYLE_ASSIGNMENT((#431));
#433=STYLED_ITEM('',(#432),#430);
#434=DIRECTION('',(0.E0,1.E0,0.E0));
#435=VECTOR('',#434,3.E0);
#436=CARTESIAN_POINT('',(-3.35E1,0.E0,7.5E0));
#437=LINE('',#436,#435);
#438=CURVE_STYLE('',#99,POSITIVE_LENGTH_MEASURE(2.E-2),#67);
#439=PRESENTATION_STYLE_ASSIGNMENT((#438));
#440=STYLED_ITEM('',(#439),#437);
#441=DIRECTION('',(0.E0,-1.E0,0.E0));
#442=VECTOR('',#441,3.E0);
#443=CARTESIAN_POINT('',(-3.25E1,3.E0,-1.25E1));
#444=LINE('',#443,#442);
#445=CURVE_STYLE('',#99,POSITIVE_LENGTH_MEASURE(2.E-2),#67);
#446=PRESENTATION_STYLE_ASSIGNMENT((#445));
#447=STYLED_ITEM('',(#446),#444);
#448=DIRECTION('',(0.E0,1.E0,0.E0));
#449=VECTOR('',#448,3.E0);
#450=CARTESIAN_POINT('',(3.75E1,0.E0,-1.25E1));
#451=LINE('',#450,#449);
#452=CURVE_STYLE('',#99,POSITIVE_LENGTH_MEASURE(2.E-2),#67);
#453=PRESENTATION_STYLE_ASSIGNMENT((#452));
#454=STYLED_ITEM('',(#453),#451);
#455=DIRECTION('',(0.E0,1.E0,0.E0));
#456=VECTOR('',#455,3.E0);
#457=CARTESIAN_POINT('',(3.75E1,0.E0,1.25E1));
#458=LINE('',#457,#456);
#459=CURVE_STYLE('',#99,POSITIVE_LENGTH_MEASURE(2.E-2),#67);
#460=PRESENTATION_STYLE_ASSIGNMENT((#459));
#461=STYLED_ITEM('',(#460),#458);
#462=DIRECTION('',(0.E0,1.E0,0.E0));
#463=VECTOR('',#462,3.E0);
#464=CARTESIAN_POINT('',(-3.75E1,0.E0,1.25E1));
#465=LINE('',#464,#463);
#466=CURVE_STYLE('',#99,POSITIVE_LENGTH_MEASURE(2.E-2),#67);
#467=PRESENTATION_STYLE_ASSIGNMENT((#466));
#468=STYLED_ITEM('',(#467),#465);
#469=DIRECTION('',(0.E0,-1.E0,0.E0));
#470=VECTOR('',#469,3.E0);
#471=CARTESIAN_POINT('',(-3.75E1,3.E0,-7.5E0));
#472=LINE('',#471,#470);
#473=CURVE_STYLE('',#99,POSITIVE_LENGTH_MEASURE(2.E-2),#67);
#474=PRESENTATION_STYLE_ASSIGNMENT((#473));
#475=STYLED_ITEM('',(#474),#472);
#476=CARTESIAN_POINT('',(-3.75E1,0.E0,1.25E1));
#477=CARTESIAN_POINT('',(3.75E1,0.E0,1.25E1));
#478=VERTEX_POINT('',#476);
#479=VERTEX_POINT('',#477);
#480=CARTESIAN_POINT('',(3.75E1,0.E0,-1.25E1));
#481=VERTEX_POINT('',#480);
#482=CARTESIAN_POINT('',(-3.75E1,3.E0,1.25E1));
#483=CARTESIAN_POINT('',(3.75E1,3.E0,1.25E1));
#484=VERTEX_POINT('',#482);
#485=VERTEX_POINT('',#483);
#486=CARTESIAN_POINT('',(3.75E1,3.E0,-1.25E1));
#487=VERTEX_POINT('',#486);
#488=CARTESIAN_POINT('',(-1.925E1,0.E0,-7.5E0));
#489=CARTESIAN_POINT('',(-2.375E1,0.E0,-7.5E0));
#490=VERTEX_POINT('',#488);
#491=VERTEX_POINT('',#489);
#492=CARTESIAN_POINT('',(2.375E1,0.E0,7.5E0));
#493=CARTESIAN_POINT('',(1.925E1,0.E0,7.5E0));
#494=VERTEX_POINT('',#492);
#495=VERTEX_POINT('',#493);
#496=CARTESIAN_POINT('',(-1.925E1,3.E0,-7.5E0));
#497=CARTESIAN_POINT('',(-2.375E1,3.E0,-7.5E0));
#498=VERTEX_POINT('',#496);
#499=VERTEX_POINT('',#497);
#500=CARTESIAN_POINT('',(2.375E1,3.E0,7.5E0));
#501=CARTESIAN_POINT('',(1.925E1,3.E0,7.5E0));
#502=VERTEX_POINT('',#500);
#503=VERTEX_POINT('',#501);
#504=CARTESIAN_POINT('',(3.35E1,0.E0,-7.5E0));
#505=CARTESIAN_POINT('',(3.15E1,0.E0,-7.5E0));
#506=VERTEX_POINT('',#504);
#507=VERTEX_POINT('',#505);
#508=CARTESIAN_POINT('',(-3.15E1,0.E0,7.5E0));
#509=CARTESIAN_POINT('',(-3.35E1,0.E0,7.5E0));
#510=VERTEX_POINT('',#508);
#511=VERTEX_POINT('',#509);
#512=CARTESIAN_POINT('',(3.35E1,3.E0,-7.5E0));
#513=CARTESIAN_POINT('',(3.15E1,3.E0,-7.5E0));
#514=VERTEX_POINT('',#512);
#515=VERTEX_POINT('',#513);
#516=CARTESIAN_POINT('',(-3.15E1,3.E0,7.5E0));
#517=CARTESIAN_POINT('',(-3.35E1,3.E0,7.5E0));
#518=VERTEX_POINT('',#516);
#519=VERTEX_POINT('',#517);
#520=CARTESIAN_POINT('',(-2.925E1,0.E0,0.E0));
#521=CARTESIAN_POINT('',(-3.375E1,0.E0,0.E0));
#522=VERTEX_POINT('',#520);
#523=VERTEX_POINT('',#521);
#524=CARTESIAN_POINT('',(3.375E1,0.E0,0.E0));
#525=CARTESIAN_POINT('',(2.925E1,0.E0,0.E0));
#526=VERTEX_POINT('',#524);
#527=VERTEX_POINT('',#525);
#528=CARTESIAN_POINT('',(-2.925E1,3.E0,0.E0));
#529=CARTESIAN_POINT('',(-3.375E1,3.E0,0.E0));
#530=VERTEX_POINT('',#528);
#531=VERTEX_POINT('',#529);
#532=CARTESIAN_POINT('',(3.375E1,3.E0,0.E0));
#533=CARTESIAN_POINT('',(2.925E1,3.E0,0.E0));
#534=VERTEX_POINT('',#532);
#535=VERTEX_POINT('',#533);
#536=CARTESIAN_POINT('',(-3.75E1,0.E0,-7.5E0));
#537=CARTESIAN_POINT('',(-3.25E1,0.E0,-1.25E1));
#538=VERTEX_POINT('',#536);
#539=VERTEX_POINT('',#537);
#540=CARTESIAN_POINT('',(-3.25E1,3.E0,-1.25E1));
#541=VERTEX_POINT('',#540);
#542=CARTESIAN_POINT('',(-3.75E1,3.E0,-7.5E0));
#543=VERTEX_POINT('',#542);
#544=CARTESIAN_POINT('',(0.E0,0.E0,0.E0));
#545=DIRECTION('',(0.E0,1.E0,0.E0));
#546=DIRECTION('',(1.E0,0.E0,0.E0));
#547=AXIS2_PLACEMENT_3D('',#544,#545,#546);
#548=PLANE('',#547);
#550=ORIENTED_EDGE('',*,*,#549,.F.);
#552=ORIENTED_EDGE('',*,*,#551,.T.);
#554=ORIENTED_EDGE('',*,*,#553,.T.);
#556=ORIENTED_EDGE('',*,*,#555,.T.);
#558=ORIENTED_EDGE('',*,*,#557,.T.);
#559=EDGE_LOOP('',(#550,#552,#554,#556,#558));
#560=FACE_OUTER_BOUND('',#559,.F.);
#562=ORIENTED_EDGE('',*,*,#561,.F.);
#564=ORIENTED_EDGE('',*,*,#563,.F.);
#565=EDGE_LOOP('',(#562,#564));
#566=FACE_BOUND('',#565,.F.);
#568=ORIENTED_EDGE('',*,*,#567,.F.);
#570=ORIENTED_EDGE('',*,*,#569,.F.);
#571=EDGE_LOOP('',(#568,#570));
#572=FACE_BOUND('',#571,.F.);
#574=ORIENTED_EDGE('',*,*,#573,.F.);
#576=ORIENTED_EDGE('',*,*,#575,.F.);
#577=EDGE_LOOP('',(#574,#576));
#578=FACE_BOUND('',#577,.F.);
#580=ORIENTED_EDGE('',*,*,#579,.F.);
#582=ORIENTED_EDGE('',*,*,#581,.F.);
#583=EDGE_LOOP('',(#580,#582));
#584=FACE_BOUND('',#583,.F.);
#586=ORIENTED_EDGE('',*,*,#585,.F.);
#588=ORIENTED_EDGE('',*,*,#587,.F.);
#589=EDGE_LOOP('',(#586,#588));
#590=FACE_BOUND('',#589,.F.);
#592=ORIENTED_EDGE('',*,*,#591,.F.);
#594=ORIENTED_EDGE('',*,*,#593,.F.);
#595=EDGE_LOOP('',(#592,#594));
#596=FACE_BOUND('',#595,.F.);
#598=CARTESIAN_POINT('',(-3.15E1,0.E0,0.E0));
#599=DIRECTION('',(0.E0,1.E0,0.E0));
#600=DIRECTION('',(1.E0,0.E0,0.E0));
#601=AXIS2_PLACEMENT_3D('',#598,#599,#600);
#602=CYLINDRICAL_SURFACE('',#601,2.25E0);
#603=ORIENTED_EDGE('',*,*,#591,.T.);
#605=ORIENTED_EDGE('',*,*,#604,.T.);
#607=ORIENTED_EDGE('',*,*,#606,.F.);
#609=ORIENTED_EDGE('',*,*,#608,.F.);
#610=EDGE_LOOP('',(#603,#605,#607,#609));
#611=FACE_OUTER_BOUND('',#610,.F.);
#613=CARTESIAN_POINT('',(-3.15E1,0.E0,0.E0));
#614=DIRECTION('',(0.E0,1.E0,0.E0));
#615=DIRECTION('',(1.E0,0.E0,0.E0));
#616=AXIS2_PLACEMENT_3D('',#613,#614,#615);
#617=CYLINDRICAL_SURFACE('',#616,2.25E0);
#618=ORIENTED_EDGE('',*,*,#593,.T.);
#619=ORIENTED_EDGE('',*,*,#608,.T.);
#621=ORIENTED_EDGE('',*,*,#620,.F.);
#622=ORIENTED_EDGE('',*,*,#604,.F.);
#623=EDGE_LOOP('',(#618,#619,#621,#622));
#624=FACE_OUTER_BOUND('',#623,.F.);
#626=CARTESIAN_POINT('',(0.E0,3.E0,0.E0));
#627=DIRECTION('',(0.E0,1.E0,0.E0));
#628=DIRECTION('',(1.E0,0.E0,0.E0));
#629=AXIS2_PLACEMENT_3D('',#626,#627,#628);
#630=PLANE('',#629);
#632=ORIENTED_EDGE('',*,*,#631,.F.);
#634=ORIENTED_EDGE('',*,*,#633,.F.);
#636=ORIENTED_EDGE('',*,*,#635,.F.);
#638=ORIENTED_EDGE('',*,*,#637,.F.);
#640=ORIENTED_EDGE('',*,*,#639,.F.);
#641=EDGE_LOOP('',(#632,#634,#636,#638,#640));
#642=FACE_OUTER_BOUND('',#641,.F.);
#644=ORIENTED_EDGE('',*,*,#643,.T.);
#646=ORIENTED_EDGE('',*,*,#645,.T.);
#647=EDGE_LOOP('',(#644,#646));
#648=FACE_BOUND('',#647,.F.);
#650=ORIENTED_EDGE('',*,*,#649,.T.);
#652=ORIENTED_EDGE('',*,*,#651,.T.);
#653=EDGE_LOOP('',(#650,#652));
#654=FACE_BOUND('',#653,.F.);
#656=ORIENTED_EDGE('',*,*,#655,.T.);
#658=ORIENTED_EDGE('',*,*,#657,.T.);
#659=EDGE_LOOP('',(#656,#658));
#660=FACE_BOUND('',#659,.F.);
#662=ORIENTED_EDGE('',*,*,#661,.T.);
#664=ORIENTED_EDGE('',*,*,#663,.T.);
#665=EDGE_LOOP('',(#662,#664));
#666=FACE_BOUND('',#665,.F.);
#668=ORIENTED_EDGE('',*,*,#667,.T.);
#670=ORIENTED_EDGE('',*,*,#669,.T.);
#671=EDGE_LOOP('',(#668,#670));
#672=FACE_BOUND('',#671,.F.);
#673=ORIENTED_EDGE('',*,*,#606,.T.);
#674=ORIENTED_EDGE('',*,*,#620,.T.);
#675=EDGE_LOOP('',(#673,#674));
#676=FACE_BOUND('',#675,.F.);
#678=CARTESIAN_POINT('',(3.15E1,0.E0,0.E0));
#679=DIRECTION('',(0.E0,1.E0,0.E0));
#680=DIRECTION('',(1.E0,0.E0,0.E0));
#681=AXIS2_PLACEMENT_3D('',#678,#679,#680);
#682=CYLINDRICAL_SURFACE('',#681,2.25E0);
#683=ORIENTED_EDGE('',*,*,#561,.T.);
#685=ORIENTED_EDGE('',*,*,#684,.T.);
#686=ORIENTED_EDGE('',*,*,#643,.F.);
#688=ORIENTED_EDGE('',*,*,#687,.F.);
#689=EDGE_LOOP('',(#683,#685,#686,#688));
#690=FACE_OUTER_BOUND('',#689,.F.);
#692=CARTESIAN_POINT('',(3.15E1,0.E0,0.E0));
#693=DIRECTION('',(0.E0,1.E0,0.E0));
#694=DIRECTION('',(1.E0,0.E0,0.E0));
#695=AXIS2_PLACEMENT_3D('',#692,#693,#694);
#696=CYLINDRICAL_SURFACE('',#695,2.25E0);
#697=ORIENTED_EDGE('',*,*,#563,.T.);
#698=ORIENTED_EDGE('',*,*,#687,.T.);
#699=ORIENTED_EDGE('',*,*,#645,.F.);
#700=ORIENTED_EDGE('',*,*,#684,.F.);
#701=EDGE_LOOP('',(#697,#698,#699,#700));
#702=FACE_OUTER_BOUND('',#701,.F.);
#704=CARTESIAN_POINT('',(-2.15E1,0.E0,-7.5E0));
#705=DIRECTION('',(0.E0,1.E0,0.E0));
#706=DIRECTION('',(1.E0,0.E0,0.E0));
#707=AXIS2_PLACEMENT_3D('',#704,#705,#706);
#708=CYLINDRICAL_SURFACE('',#707,2.25E0);
#709=ORIENTED_EDGE('',*,*,#567,.T.);
#711=ORIENTED_EDGE('',*,*,#710,.T.);
#712=ORIENTED_EDGE('',*,*,#649,.F.);
#714=ORIENTED_EDGE('',*,*,#713,.F.);
#715=EDGE_LOOP('',(#709,#711,#712,#714));
#716=FACE_OUTER_BOUND('',#715,.F.);
#718=CARTESIAN_POINT('',(-2.15E1,0.E0,-7.5E0));
#719=DIRECTION('',(0.E0,1.E0,0.E0));
#720=DIRECTION('',(1.E0,0.E0,0.E0));
#721=AXIS2_PLACEMENT_3D('',#718,#719,#720);
#722=CYLINDRICAL_SURFACE('',#721,2.25E0);
#723=ORIENTED_EDGE('',*,*,#569,.T.);
#724=ORIENTED_EDGE('',*,*,#713,.T.);
#725=ORIENTED_EDGE('',*,*,#651,.F.);
#726=ORIENTED_EDGE('',*,*,#710,.F.);
#727=EDGE_LOOP('',(#723,#724,#725,#726));
#728=FACE_OUTER_BOUND('',#727,.F.);
#730=CARTESIAN_POINT('',(2.15E1,0.E0,7.5E0));
#731=DIRECTION('',(0.E0,1.E0,0.E0));
#732=DIRECTION('',(1.E0,0.E0,0.E0));
#733=AXIS2_PLACEMENT_3D('',#730,#731,#732);
#734=CYLINDRICAL_SURFACE('',#733,2.25E0);
#735=ORIENTED_EDGE('',*,*,#573,.T.);
#737=ORIENTED_EDGE('',*,*,#736,.T.);
#738=ORIENTED_EDGE('',*,*,#655,.F.);
#740=ORIENTED_EDGE('',*,*,#739,.F.);
#741=EDGE_LOOP('',(#735,#737,#738,#740));
#742=FACE_OUTER_BOUND('',#741,.F.);
#744=CARTESIAN_POINT('',(2.15E1,0.E0,7.5E0));
#745=DIRECTION('',(0.E0,1.E0,0.E0));
#746=DIRECTION('',(1.E0,0.E0,0.E0));
#747=AXIS2_PLACEMENT_3D('',#744,#745,#746);
#748=CYLINDRICAL_SURFACE('',#747,2.25E0);
#749=ORIENTED_EDGE('',*,*,#575,.T.);
#750=ORIENTED_EDGE('',*,*,#739,.T.);
#751=ORIENTED_EDGE('',*,*,#657,.F.);
#752=ORIENTED_EDGE('',*,*,#736,.F.);
#753=EDGE_LOOP('',(#749,#750,#751,#752));
#754=FACE_OUTER_BOUND('',#753,.F.);
#756=CARTESIAN_POINT('',(3.25E1,0.E0,-7.5E0));
#757=DIRECTION('',(0.E0,1.E0,0.E0));
#758=DIRECTION('',(1.E0,0.E0,0.E0));
#759=AXIS2_PLACEMENT_3D('',#756,#757,#758);
#760=CYLINDRICAL_SURFACE('',#759,1.E0);
#761=ORIENTED_EDGE('',*,*,#579,.T.);
#763=ORIENTED_EDGE('',*,*,#762,.T.);
#764=ORIENTED_EDGE('',*,*,#661,.F.);
#766=ORIENTED_EDGE('',*,*,#765,.F.);
#767=EDGE_LOOP('',(#761,#763,#764,#766));
#768=FACE_OUTER_BOUND('',#767,.F.);
#770=CARTESIAN_POINT('',(3.25E1,0.E0,-7.5E0));
#771=DIRECTION('',(0.E0,1.E0,0.E0));
#772=DIRECTION('',(1.E0,0.E0,0.E0));
#773=AXIS2_PLACEMENT_3D('',#770,#771,#772);
#774=CYLINDRICAL_SURFACE('',#773,1.E0);
#775=ORIENTED_EDGE('',*,*,#581,.T.);
#776=ORIENTED_EDGE('',*,*,#765,.T.);
#777=ORIENTED_EDGE('',*,*,#663,.F.);
#778=ORIENTED_EDGE('',*,*,#762,.F.);
#779=EDGE_LOOP('',(#775,#776,#777,#778));
#780=FACE_OUTER_BOUND('',#779,.F.);
#782=CARTESIAN_POINT('',(-3.25E1,0.E0,7.5E0));
#783=DIRECTION('',(0.E0,1.E0,0.E0));
#784=DIRECTION('',(1.E0,0.E0,0.E0));
#785=AXIS2_PLACEMENT_3D('',#782,#783,#784);
#786=CYLINDRICAL_SURFACE('',#785,1.E0);
#787=ORIENTED_EDGE('',*,*,#585,.T.);
#789=ORIENTED_EDGE('',*,*,#788,.T.);
#790=ORIENTED_EDGE('',*,*,#667,.F.);
#792=ORIENTED_EDGE('',*,*,#791,.F.);
#793=EDGE_LOOP('',(#787,#789,#790,#792));
#794=FACE_OUTER_BOUND('',#793,.F.);
#796=CARTESIAN_POINT('',(-3.25E1,0.E0,7.5E0));
#797=DIRECTION('',(0.E0,1.E0,0.E0));
#798=DIRECTION('',(1.E0,0.E0,0.E0));
#799=AXIS2_PLACEMENT_3D('',#796,#797,#798);
#800=CYLINDRICAL_SURFACE('',#799,1.E0);
#801=ORIENTED_EDGE('',*,*,#587,.T.);
#802=ORIENTED_EDGE('',*,*,#791,.T.);
#803=ORIENTED_EDGE('',*,*,#669,.F.);
#804=ORIENTED_EDGE('',*,*,#788,.F.);
#805=EDGE_LOOP('',(#801,#802,#803,#804));
#806=FACE_OUTER_BOUND('',#805,.F.);
#808=CARTESIAN_POINT('',(-3.5E1,1.5E0,-1.E1));
#809=DIRECTION('',(-7.071067811865E-1,0.E0,-7.071067811865E-1));
#810=DIRECTION('',(7.071067811865E-1,0.E0,-7.071067811865E-1));
#811=AXIS2_PLACEMENT_3D('',#808,#809,#810);
#812=PLANE('',#811);
#813=ORIENTED_EDGE('',*,*,#549,.T.);
#815=ORIENTED_EDGE('',*,*,#814,.F.);
#816=ORIENTED_EDGE('',*,*,#631,.T.);
#818=ORIENTED_EDGE('',*,*,#817,.T.);
#819=EDGE_LOOP('',(#813,#815,#816,#818));
#820=FACE_OUTER_BOUND('',#819,.F.);
#822=CARTESIAN_POINT('',(3.75E1,0.E0,-1.25E1));
#823=DIRECTION('',(0.E0,0.E0,-1.E0));
#824=DIRECTION('',(-1.E0,0.E0,0.E0));
#825=AXIS2_PLACEMENT_3D('',#822,#823,#824);
#826=PLANE('',#825);
#827=ORIENTED_EDGE('',*,*,#814,.T.);
#828=ORIENTED_EDGE('',*,*,#557,.F.);
#830=ORIENTED_EDGE('',*,*,#829,.T.);
#831=ORIENTED_EDGE('',*,*,#633,.T.);
#832=EDGE_LOOP('',(#827,#828,#830,#831));
#833=FACE_OUTER_BOUND('',#832,.F.);
#835=CARTESIAN_POINT('',(3.75E1,0.E0,1.25E1));
#836=DIRECTION('',(1.E0,0.E0,0.E0));
#837=DIRECTION('',(0.E0,0.E0,-1.E0));
#838=AXIS2_PLACEMENT_3D('',#835,#836,#837);
#839=PLANE('',#838);
#840=ORIENTED_EDGE('',*,*,#555,.F.);
#842=ORIENTED_EDGE('',*,*,#841,.T.);
#843=ORIENTED_EDGE('',*,*,#635,.T.);
#844=ORIENTED_EDGE('',*,*,#829,.F.);
#845=EDGE_LOOP('',(#840,#842,#843,#844));
#846=FACE_OUTER_BOUND('',#845,.F.);
#848=CARTESIAN_POINT('',(-3.75E1,0.E0,1.25E1));
#849=DIRECTION('',(0.E0,0.E0,1.E0));
#850=DIRECTION('',(1.E0,0.E0,0.E0));
#851=AXIS2_PLACEMENT_3D('',#848,#849,#850);
#852=PLANE('',#851);
#853=ORIENTED_EDGE('',*,*,#553,.F.);
#855=ORIENTED_EDGE('',*,*,#854,.T.);
#856=ORIENTED_EDGE('',*,*,#637,.T.);
#857=ORIENTED_EDGE('',*,*,#841,.F.);
#858=EDGE_LOOP('',(#853,#855,#856,#857));
#859=FACE_OUTER_BOUND('',#858,.F.);
#861=CARTESIAN_POINT('',(-3.75E1,0.E0,-1.25E1));
#862=DIRECTION('',(-1.E0,0.E0,0.E0));
#863=DIRECTION('',(0.E0,0.E0,1.E0));
#864=AXIS2_PLACEMENT_3D('',#861,#862,#863);
#865=PLANE('',#864);
#866=ORIENTED_EDGE('',*,*,#817,.F.);
#867=ORIENTED_EDGE('',*,*,#639,.T.);
#868=ORIENTED_EDGE('',*,*,#854,.F.);
#869=ORIENTED_EDGE('',*,*,#551,.F.);
#870=EDGE_LOOP('',(#866,#867,#868,#869));
#871=FACE_OUTER_BOUND('',#870,.F.);
#873=CLOSED_SHELL('',(#597,#612,#625,#677,#691,#703,#717,#729,#743,#755,#769,
#781,#795,#807,#821,#834,#847,#860,#872));
#874=MANIFOLD_SOLID_BREP('',#873);
#875=FILL_AREA_STYLE_COLOUR('',#67);
#876=FILL_AREA_STYLE('',(#875));
#877=SURFACE_STYLE_FILL_AREA(#876);
#878=SURFACE_SIDE_STYLE('',(#877));
#879=SURFACE_STYLE_USAGE(.BOTH.,#878);
#880=PRESENTATION_STYLE_ASSIGNMENT((#879));
#93=STYLED_ITEM('',(#880),#874);
#881=PRESENTATION_LAYER_ASSIGNMENT('SOLIDE','',(#93));
#884=PLANE_ANGLE_MEASURE_WITH_UNIT(PLANE_ANGLE_MEASURE(1.745329251994E-2),#883);
#885=(CONVERSION_BASED_UNIT('DEGREE',#884)NAMED_UNIT(*)PLANE_ANGLE_UNIT());
#887=UNCERTAINTY_MEASURE_WITH_UNIT(LENGTH_MEASURE(7.911067747159E-3),#882,
'distance_accuracy_value',
'Maximum model space distance between geometric entities at asserted connectivities');
#890=MECHANICAL_DESIGN_GEOMETRIC_PRESENTATION_REPRESENTATION('',(#102,#110,#118,
#126,#134,#142,#150,#158,#166,#174,#182,#190,#197,#204,#211,#218,#225,#232,#239,
#247,#255,#263,#271,#279,#287,#295,#303,#311,#319,#327,#335,#342,#349,#356,#363,
#370,#377,#384,#391,#398,#405,#412,#419,#426,#433,#440,#447,#454,#461,#468,#475,
#93),#888);
#891=APPLICATION_CONTEXT('automotive_design');
#892=APPLICATION_PROTOCOL_DEFINITION('international standard',
'automotive_design',2001,#891);
#893=PRODUCT_DEFINITION_CONTEXT('part definition',#891,'design');
#894=PRODUCT_CONTEXT('',#891,'mechanical');
#895=PRODUCT('BCBBBV6_SUPPORT_LUER','BCBBBV6_SUPPORT_LUER','NOT SPECIFIED',
(#894));
#896=PRODUCT_DEFINITION_FORMATION('5','LAST_VERSION',#895);
#904=DERIVED_UNIT_ELEMENT(#903,2.E0);
#905=DERIVED_UNIT((#904));
#906=MEASURE_REPRESENTATION_ITEM('surface area measure',AREA_MEASURE(
4.383757445488E3),#905);
#911=DERIVED_UNIT_ELEMENT(#910,3.E0);
#912=DERIVED_UNIT((#911));
#913=MEASURE_REPRESENTATION_ITEM('volume measure',VOLUME_MEASURE(
5.377798690373E3),#912);
#917=CARTESIAN_POINT('centre point',(2.498698960981E-1,1.5E0,
7.554206161106E-2));
#922=DERIVED_UNIT_ELEMENT(#921,2.E0);
#923=DERIVED_UNIT((#922));
#924=MEASURE_REPRESENTATION_ITEM('surface area measure',AREA_MEASURE(
4.383757445488E3),#923);
#929=DERIVED_UNIT_ELEMENT(#928,3.E0);
#930=DERIVED_UNIT((#929));
#931=MEASURE_REPRESENTATION_ITEM('volume measure',VOLUME_MEASURE(
5.377798690373E3),#930);
#935=CARTESIAN_POINT('centre point',(2.498698960981E-1,1.5E0,
7.554206161106E-2));
#940=PRODUCT_RELATED_PRODUCT_CATEGORY('part','',(#895));
#942=GENERAL_PROPERTY('','PTC_COMMON_NAME','user defined attribute');
#943=GENERAL_PROPERTY_ASSOCIATION('user defined attribute','',#942,#941);
#944=DESCRIPTIVE_REPRESENTATION_ITEM('PTC_COMMON_NAME',
'bcbbbv6_support_luer.prt');
#948=GENERAL_PROPERTY('','MATIERE','user defined attribute');
#949=GENERAL_PROPERTY_ASSOCIATION('user defined attribute','',#948,#947);
#950=DESCRIPTIVE_REPRESENTATION_ITEM('MATIERE','ACIER_A60');
#954=GENERAL_PROPERTY('','FOURNISSEUR','user defined attribute');
#955=GENERAL_PROPERTY_ASSOCIATION('user defined attribute','',#954,#953);
#956=DESCRIPTIVE_REPRESENTATION_ITEM('FOURNISSEUR','hepia');
#960=GENERAL_PROPERTY('','PRIX','user defined attribute');
#961=GENERAL_PROPERTY_ASSOCIATION('user defined attribute','',#960,#959);
#962=VALUE_REPRESENTATION_ITEM('PRIX',NUMERIC_MEASURE(0.E0));
#965=DESCRIPTIVE_REPRESENTATION_ITEM('attribute description','Real Number');
#970=GENERAL_PROPERTY('','MASSE','user defined attribute');
#971=GENERAL_PROPERTY_ASSOCIATION('user defined attribute','',#970,#969);
#972=VALUE_REPRESENTATION_ITEM('MASSE',NUMERIC_MEASURE(7.87E-3));
#975=DESCRIPTIVE_REPRESENTATION_ITEM('attribute description','Real Number');
#980=GENERAL_PROPERTY('','MASSE_KG','user defined attribute');
#981=GENERAL_PROPERTY_ASSOCIATION('user defined attribute','',#980,#979);
#982=VALUE_REPRESENTATION_ITEM('MASSE_KG',NUMERIC_MEASURE(0.E0));
#985=DESCRIPTIVE_REPRESENTATION_ITEM('attribute description','Real Number');
#990=GENERAL_PROPERTY('','PTC_MATERIAL_NAME','user defined attribute');
#991=GENERAL_PROPERTY_ASSOCIATION('user defined attribute','',#990,#989);
#992=DESCRIPTIVE_REPRESENTATION_ITEM('PTC_MATERIAL_NAME','ACIER_A60');
#996=GENERAL_PROPERTY('','CONCEPTEUR','user defined attribute');
#997=GENERAL_PROPERTY_ASSOCIATION('user defined attribute','',#996,#995);
#998=DESCRIPTIVE_REPRESENTATION_ITEM('CONCEPTEUR','');
#1002=GENERAL_PROPERTY('','DESSIN','user defined attribute');
#1003=GENERAL_PROPERTY_ASSOCIATION('user defined attribute','',#1002,#1001);
#1004=DESCRIPTIVE_REPRESENTATION_ITEM('DESSIN','gm2-g1-00.00');
#1008=GENERAL_PROPERTY('','MFG_WP_MATERIAL','user defined attribute');
#1009=GENERAL_PROPERTY_ASSOCIATION('user defined attribute','',#1008,#1007);
#1010=DESCRIPTIVE_REPRESENTATION_ITEM('MFG_WP_MATERIAL','ACIER_A60');
#1=COLOUR_RGB('',0.E0,0.E0,4.7E-1);
#2=COLOUR_RGB('',0.E0,0.E0,6.E-1);
#3=COLOUR_RGB('',0.E0,0.E0,8.E-1);
#4=DRAUGHTING_PRE_DEFINED_COLOUR('blue');
#5=COLOUR_RGB('',0.E0,2.E-1,1.E0);
#6=COLOUR_RGB('',0.E0,4.E-1,0.E0);
#7=COLOUR_RGB('',0.E0,4.E-1,4.E-1);
#8=COLOUR_RGB('',0.E0,4.E-1,1.E0);
#9=COLOUR_RGB('',0.E0,5.3E-1,5.3E-1);
#10=COLOUR_RGB('',0.E0,6.E-1,0.E0);
#11=COLOUR_RGB('',0.E0,6.E-1,1.E0);
#12=COLOUR_RGB('',0.E0,8.E-1,0.E0);
#13=COLOUR_RGB('',0.E0,8.E-1,8.E-1);
#14=COLOUR_RGB('',0.E0,8.E-1,1.E0);
#15=DRAUGHTING_PRE_DEFINED_COLOUR('green');
#16=COLOUR_RGB('',0.E0,1.E0,2.E-1);
#17=COLOUR_RGB('',0.E0,1.E0,4.E-1);
#18=COLOUR_RGB('',0.E0,1.E0,6.E-1);
#19=COLOUR_RGB('',0.E0,1.E0,8.E-1);
#20=DRAUGHTING_PRE_DEFINED_COLOUR('cyan');
#21=COLOUR_RGB('',2.E-1,1.E0,0.E0);
#22=COLOUR_RGB('',2.E-1,1.E0,2.E-1);
#23=COLOUR_RGB('',2.E-1,1.E0,1.E0);
#24=COLOUR_RGB('',2.7E-1,0.E0,4.E-1);
#25=COLOUR_RGB('',2.7E-1,2.7E-1,0.E0);
#26=COLOUR_RGB('',2.7E-1,2.7E-1,1.E0);
#27=COLOUR_RGB('',3.3E-1,0.E0,0.E0);
#28=COLOUR_RGB('',3.3E-1,0.E0,5.3E-1);
#29=COLOUR_RGB('',4.E-1,0.E0,4.E-1);
#30=COLOUR_RGB('',4.E-1,0.E0,6.7E-1);
#31=COLOUR_RGB('',4.E-1,1.3E-1,0.E0);
#32=COLOUR_RGB('',4.E-1,4.E-1,0.E0);
#33=COLOUR_RGB('',4.E-1,4.E-1,1.E0);
#34=COLOUR_RGB('',4.E-1,1.E0,0.E0);
#35=COLOUR_RGB('',4.E-1,1.E0,4.E-1);
#36=COLOUR_RGB('',4.E-1,1.E0,1.E0);
#37=COLOUR_RGB('',4.7E-1,0.E0,0.E0);
#38=COLOUR_RGB('',4.7E-1,0.E0,8.7E-1);
#39=COLOUR_RGB('',4.7E-1,2.E-1,7.E-2);
#40=COLOUR_RGB('',4.7E-1,4.7E-1,4.7E-1);
#41=COLOUR_RGB('',5.3E-1,2.7E-1,1.3E-1);
#42=COLOUR_RGB('',6.E-1,2.E-1,1.E0);
#43=COLOUR_RGB('',6.E-1,3.3E-1,2.E-1);
#44=COLOUR_RGB('',6.E-1,6.E-1,0.E0);
#45=COLOUR_RGB('',6.E-1,6.E-1,1.E0);
#46=COLOUR_RGB('',6.E-1,1.E0,6.E-1);
#47=COLOUR_RGB('',6.E-1,1.E0,1.E0);
#48=COLOUR_RGB('',6.35294E-1,6.86275E-1,7.4902E-1);
#49=COLOUR_RGB('',6.7E-1,0.E0,0.E0);
#50=COLOUR_RGB('',6.7E-1,0.E0,5.3E-1);
#51=COLOUR_RGB('',6.7E-1,4.E-1,2.7E-1);
#52=COLOUR_RGB('',6.7E-1,4.E-1,1.E0);
#53=COLOUR_RGB('',6.7E-1,1.E0,0.E0);
#54=COLOUR_RGB('',7.3E-1,2.7E-1,1.E0);
#55=COLOUR_RGB('',7.3E-1,4.E-1,0.E0);
#56=COLOUR_RGB('',7.3E-1,4.7E-1,3.3E-1);
#57=COLOUR_RGB('',7.3E-1,7.3E-1,7.3E-1);
#58=COLOUR_RGB('',8.E-1,0.E0,8.E-1);
#59=COLOUR_RGB('',8.E-1,5.3E-1,4.E-1);
#60=COLOUR_RGB('',8.E-1,6.E-1,1.E0);
#61=COLOUR_RGB('',8.E-1,8.E-1,0.E0);
#62=COLOUR_RGB('',8.E-1,8.E-1,1.E0);
#63=COLOUR_RGB('',8.E-1,1.E0,8.E-1);
#64=COLOUR_RGB('',8.E-1,1.E0,1.E0);
#65=COLOUR_RGB('',8.7E-1,0.E0,0.E0);
#66=COLOUR_RGB('',8.7E-1,6.E-1,4.7E-1);
#67=COLOUR_RGB('',8.784E-1,9.49E-1,1.E0);
#68=COLOUR_RGB('',9.3E-1,1.E0,1.E0);
#69=DRAUGHTING_PRE_DEFINED_COLOUR('red');
#70=COLOUR_RGB('',1.E0,0.E0,2.7E-1);
#71=COLOUR_RGB('',1.E0,0.E0,4.7E-1);
#72=DRAUGHTING_PRE_DEFINED_COLOUR('magenta');
#73=COLOUR_RGB('',1.E0,2.E-1,1.E0);
#74=COLOUR_RGB('',1.E0,2.7E-1,0.E0);
#75=COLOUR_RGB('',1.E0,2.7E-1,2.7E-1);
#76=COLOUR_RGB('',1.E0,4.E-1,1.E0);
#77=COLOUR_RGB('',1.E0,4.7E-1,0.E0);
#78=COLOUR_RGB('',1.E0,4.7E-1,5.3E-1);
#79=COLOUR_RGB('',1.E0,6.E-1,1.E0);
#80=COLOUR_RGB('',1.E0,6.7E-1,0.E0);
#81=COLOUR_RGB('',1.E0,6.7E-1,6.7E-1);
#82=COLOUR_RGB('',1.E0,7.3E-1,5.3E-1);
#83=COLOUR_RGB('',1.E0,8.E-1,8.E-1);
#84=COLOUR_RGB('',1.E0,8.E-1,1.E0);
#85=COLOUR_RGB('',1.E0,8.7E-1,0.E0);
#86=COLOUR_RGB('',1.E0,9.3E-1,9.3E-1);
#87=DRAUGHTING_PRE_DEFINED_COLOUR('yellow');
#88=COLOUR_RGB('',1.E0,1.E0,1.3E-1);
#89=COLOUR_RGB('',1.E0,1.E0,3.3E-1);
#90=COLOUR_RGB('',1.E0,1.E0,5.3E-1);
#91=COLOUR_RGB('',1.E0,1.E0,7.3E-1);
#92=DRAUGHTING_PRE_DEFINED_COLOUR('white');
#98=CIRCLE('',#97,2.25E0);
#107=CIRCLE('',#106,2.25E0);
#115=CIRCLE('',#114,2.25E0);
#123=CIRCLE('',#122,2.25E0);
#131=CIRCLE('',#130,2.25E0);
#139=CIRCLE('',#138,2.25E0);
#147=CIRCLE('',#146,2.25E0);
#155=CIRCLE('',#154,2.25E0);
#163=CIRCLE('',#162,1.E0);
#171=CIRCLE('',#170,1.E0);
#179=CIRCLE('',#178,1.E0);
#187=CIRCLE('',#186,1.E0);
#244=CIRCLE('',#243,2.25E0);
#252=CIRCLE('',#251,2.25E0);
#260=CIRCLE('',#259,2.25E0);
#268=CIRCLE('',#267,2.25E0);
#276=CIRCLE('',#275,2.25E0);
#284=CIRCLE('',#283,2.25E0);
#292=CIRCLE('',#291,2.25E0);
#300=CIRCLE('',#299,2.25E0);
#308=CIRCLE('',#307,1.E0);
#316=CIRCLE('',#315,1.E0);
#324=CIRCLE('',#323,1.E0);
#332=CIRCLE('',#331,1.E0);
#549=EDGE_CURVE('',#538,#539,#194,.T.);
#551=EDGE_CURVE('',#538,#478,#201,.T.);
#553=EDGE_CURVE('',#478,#479,#208,.T.);
#555=EDGE_CURVE('',#479,#481,#215,.T.);
#557=EDGE_CURVE('',#481,#539,#222,.T.);
#561=EDGE_CURVE('',#526,#527,#115,.T.);
#563=EDGE_CURVE('',#527,#526,#123,.T.);
#567=EDGE_CURVE('',#490,#491,#131,.T.);
#569=EDGE_CURVE('',#491,#490,#139,.T.);
#573=EDGE_CURVE('',#494,#495,#147,.T.);
#575=EDGE_CURVE('',#495,#494,#155,.T.);
#579=EDGE_CURVE('',#506,#507,#163,.T.);
#581=EDGE_CURVE('',#507,#506,#171,.T.);
#585=EDGE_CURVE('',#510,#511,#179,.T.);
#587=EDGE_CURVE('',#511,#510,#187,.T.);
#591=EDGE_CURVE('',#522,#523,#98,.T.);
#593=EDGE_CURVE('',#523,#522,#107,.T.);
#597=ADVANCED_FACE('',(#560,#566,#572,#578,#584,#590,#596),#548,.F.);
#604=EDGE_CURVE('',#523,#531,#236,.T.);
#606=EDGE_CURVE('',#530,#531,#244,.T.);
#608=EDGE_CURVE('',#522,#530,#229,.T.);
#612=ADVANCED_FACE('',(#611),#602,.F.);
#620=EDGE_CURVE('',#531,#530,#252,.T.);
#625=ADVANCED_FACE('',(#624),#617,.F.);
#631=EDGE_CURVE('',#541,#543,#339,.T.);
#633=EDGE_CURVE('',#487,#541,#346,.T.);
#635=EDGE_CURVE('',#485,#487,#353,.T.);
#637=EDGE_CURVE('',#484,#485,#360,.T.);
#639=EDGE_CURVE('',#543,#484,#367,.T.);
#643=EDGE_CURVE('',#534,#535,#260,.T.);
#645=EDGE_CURVE('',#535,#534,#268,.T.);
#649=EDGE_CURVE('',#498,#499,#276,.T.);
#651=EDGE_CURVE('',#499,#498,#284,.T.);
#655=EDGE_CURVE('',#502,#503,#292,.T.);
#657=EDGE_CURVE('',#503,#502,#300,.T.);
#661=EDGE_CURVE('',#514,#515,#308,.T.);
#663=EDGE_CURVE('',#515,#514,#316,.T.);
#667=EDGE_CURVE('',#518,#519,#324,.T.);
#669=EDGE_CURVE('',#519,#518,#332,.T.);
#677=ADVANCED_FACE('',(#642,#648,#654,#660,#666,#672,#676),#630,.T.);
#684=EDGE_CURVE('',#527,#535,#381,.T.);
#687=EDGE_CURVE('',#526,#534,#374,.T.);
#691=ADVANCED_FACE('',(#690),#682,.F.);
#703=ADVANCED_FACE('',(#702),#696,.F.);
#710=EDGE_CURVE('',#491,#499,#395,.T.);
#713=EDGE_CURVE('',#490,#498,#388,.T.);
#717=ADVANCED_FACE('',(#716),#708,.F.);
#729=ADVANCED_FACE('',(#728),#722,.F.);
#736=EDGE_CURVE('',#495,#503,#409,.T.);
#739=EDGE_CURVE('',#494,#502,#402,.T.);
#743=ADVANCED_FACE('',(#742),#734,.F.);
#755=ADVANCED_FACE('',(#754),#748,.F.);
#762=EDGE_CURVE('',#507,#515,#423,.T.);
#765=EDGE_CURVE('',#506,#514,#416,.T.);
#769=ADVANCED_FACE('',(#768),#760,.F.);
#781=ADVANCED_FACE('',(#780),#774,.F.);
#788=EDGE_CURVE('',#511,#519,#437,.T.);
#791=EDGE_CURVE('',#510,#518,#430,.T.);
#795=ADVANCED_FACE('',(#794),#786,.F.);
#807=ADVANCED_FACE('',(#806),#800,.F.);
#814=EDGE_CURVE('',#541,#539,#444,.T.);
#817=EDGE_CURVE('',#543,#538,#472,.T.);
#821=ADVANCED_FACE('',(#820),#812,.T.);
#829=EDGE_CURVE('',#481,#487,#451,.T.);
#834=ADVANCED_FACE('',(#833),#826,.T.);
#841=EDGE_CURVE('',#479,#485,#458,.T.);
#847=ADVANCED_FACE('',(#846),#839,.T.);
#854=EDGE_CURVE('',#478,#484,#465,.T.);
#860=ADVANCED_FACE('',(#859),#852,.T.);
#872=ADVANCED_FACE('',(#871),#865,.T.);
#882=(LENGTH_UNIT()NAMED_UNIT(*)SI_UNIT(.MILLI.,.METRE.));
#883=(NAMED_UNIT(*)PLANE_ANGLE_UNIT()SI_UNIT($,.RADIAN.));
#886=(NAMED_UNIT(*)SI_UNIT($,.STERADIAN.)SOLID_ANGLE_UNIT());
#888=(GEOMETRIC_REPRESENTATION_CONTEXT(3)GLOBAL_UNCERTAINTY_ASSIGNED_CONTEXT((
#887))GLOBAL_UNIT_ASSIGNED_CONTEXT((#882,#885,#886))REPRESENTATION_CONTEXT
('ID1','3'));
#889=ADVANCED_BREP_SHAPE_REPRESENTATION('',(#874),#888);
#897=PRODUCT_DEFINITION('part definition','',#896,#893);
#898=PRODUCT_DEFINITION_SHAPE('','SHAPE FOR BCBBBV6_SUPPORT_LUER.',#897);
#899=SHAPE_ASPECT('','solid data associated with BCBBBV6_SUPPORT_LUER',#898,
.F.);
#900=PROPERTY_DEFINITION('',
'shape for solid data with which properties are associated',#899);
#901=SHAPE_REPRESENTATION('',(#874),#888);
#902=SHAPE_DEFINITION_REPRESENTATION(#900,#901);
#903=(LENGTH_UNIT()NAMED_UNIT(*)SI_UNIT(.MILLI.,.METRE.));
#907=PROPERTY_DEFINITION('geometric validation property',
'area of BCBBBV6_SUPPORT_LUER',#899);
#908=REPRESENTATION('surface area',(#906),#888);
#909=PROPERTY_DEFINITION_REPRESENTATION(#907,#908);
#910=(LENGTH_UNIT()NAMED_UNIT(*)SI_UNIT(.MILLI.,.METRE.));
#914=PROPERTY_DEFINITION('geometric validation property',
'volume of BCBBBV6_SUPPORT_LUER',#899);
#915=REPRESENTATION('volume',(#913),#888);
#916=PROPERTY_DEFINITION_REPRESENTATION(#914,#915);
#918=PROPERTY_DEFINITION('geometric validation property',
'centroid of BCBBBV6_SUPPORT_LUER',#899);
#919=REPRESENTATION('centroid',(#917),#888);
#920=PROPERTY_DEFINITION_REPRESENTATION(#918,#919);
#921=(LENGTH_UNIT()NAMED_UNIT(*)SI_UNIT(.MILLI.,.METRE.));
#925=PROPERTY_DEFINITION('geometric validation property',
'area of BCBBBV6_SUPPORT_LUER',#898);
#926=REPRESENTATION('surface area',(#924),#888);
#927=PROPERTY_DEFINITION_REPRESENTATION(#925,#926);
#928=(LENGTH_UNIT()NAMED_UNIT(*)SI_UNIT(.MILLI.,.METRE.));
#932=PROPERTY_DEFINITION('geometric validation property',
'volume of BCBBBV6_SUPPORT_LUER',#898);
#933=REPRESENTATION('volume',(#931),#888);
#934=PROPERTY_DEFINITION_REPRESENTATION(#932,#933);
#936=PROPERTY_DEFINITION('geometric validation property',
'centroid of BCBBBV6_SUPPORT_LUER',#898);
#937=REPRESENTATION('centroid',(#935),#888);
#938=PROPERTY_DEFINITION_REPRESENTATION(#936,#937);
#939=SHAPE_DEFINITION_REPRESENTATION(#898,#889);
#941=PROPERTY_DEFINITION('PTC_COMMON_NAME','user defined attribute',#897);
#945=REPRESENTATION('',(#944),#888);
#946=PROPERTY_DEFINITION_REPRESENTATION(#941,#945);
#947=PROPERTY_DEFINITION('MATIERE','user defined attribute',#897);
#951=REPRESENTATION('',(#950),#888);
#952=PROPERTY_DEFINITION_REPRESENTATION(#947,#951);
#953=PROPERTY_DEFINITION('FOURNISSEUR','user defined attribute',#897);
#957=REPRESENTATION('',(#956),#888);
#958=PROPERTY_DEFINITION_REPRESENTATION(#953,#957);
#959=PROPERTY_DEFINITION('PRIX','user defined attribute',#897);
#963=REPRESENTATION('',(#962),#888);
#964=PROPERTY_DEFINITION_REPRESENTATION(#959,#963);
#966=REPRESENTATION('',(#965),#888);
#967=PROPERTY_DEFINITION('attribute type designation','Real Number',#960);
#968=PROPERTY_DEFINITION_REPRESENTATION(#967,#966);
#969=PROPERTY_DEFINITION('MASSE','user defined attribute',#897);
#973=REPRESENTATION('',(#972),#888);
#974=PROPERTY_DEFINITION_REPRESENTATION(#969,#973);
#976=REPRESENTATION('',(#975),#888);
#977=PROPERTY_DEFINITION('attribute type designation','Real Number',#970);
#978=PROPERTY_DEFINITION_REPRESENTATION(#977,#976);
#979=PROPERTY_DEFINITION('MASSE_KG','user defined attribute',#897);
#983=REPRESENTATION('',(#982),#888);
#984=PROPERTY_DEFINITION_REPRESENTATION(#979,#983);
#986=REPRESENTATION('',(#985),#888);
#987=PROPERTY_DEFINITION('attribute type designation','Real Number',#980);
#988=PROPERTY_DEFINITION_REPRESENTATION(#987,#986);
#989=PROPERTY_DEFINITION('PTC_MATERIAL_NAME','user defined attribute',#897);
#993=REPRESENTATION('',(#992),#888);
#994=PROPERTY_DEFINITION_REPRESENTATION(#989,#993);
#995=PROPERTY_DEFINITION('CONCEPTEUR','user defined attribute',#897);
#999=REPRESENTATION('',(#998),#888);
#1000=PROPERTY_DEFINITION_REPRESENTATION(#995,#999);
#1001=PROPERTY_DEFINITION('DESSIN','user defined attribute',#897);
#1005=REPRESENTATION('',(#1004),#888);
#1006=PROPERTY_DEFINITION_REPRESENTATION(#1001,#1005);
#1007=PROPERTY_DEFINITION('MFG_WP_MATERIAL','user defined attribute',#897);
#1011=REPRESENTATION('',(#1010),#888);
#1012=PROPERTY_DEFINITION_REPRESENTATION(#1007,#1011);
ENDSEC;
END-ISO-10303-21;
