# Supplementary material
Source: MDPI journal article supplement (https://www.mdpi.com/2076-3417/11/12/5584)
Supplement: s1 [file s1 › hepia_bbb_upper_channel.stp]

ISO-10303-21;
HEADER;
FILE_DESCRIPTION((''),'2;1');
FILE_NAME('BCBBBV6_CHAMBRE_SUPERIEURE','2020-11-24T11:11:35',('loris.gomezbai'),
(''),'CREO PARAMETRIC BY PTC INC, 2016390',
'CREO PARAMETRIC BY PTC INC, 2016390','');
FILE_SCHEMA(('AUTOMOTIVE_DESIGN { 1 0 10303 214 1 1 1 1 }'));
ENDSEC;
DATA;
#94=CARTESIAN_POINT('',(-2.15E1,0.E0,-7.5E0));
#95=DIRECTION('',(0.E0,1.E0,0.E0));
#96=DIRECTION('',(1.E0,0.E0,0.E0));
#97=AXIS2_PLACEMENT_3D('',#94,#95,#96);
#99=DRAUGHTING_PRE_DEFINED_CURVE_FONT('continuous');
#100=CURVE_STYLE('',#99,POSITIVE_LENGTH_MEASURE(2.E-2),#67);
#101=PRESENTATION_STYLE_ASSIGNMENT((#100));
#102=STYLED_ITEM('',(#101),#98);
#103=CARTESIAN_POINT('',(-2.15E1,0.E0,-7.5E0));
#104=DIRECTION('',(0.E0,1.E0,0.E0));
#105=DIRECTION('',(-1.E0,0.E0,0.E0));
#106=AXIS2_PLACEMENT_3D('',#103,#104,#105);
#108=CURVE_STYLE('',#99,POSITIVE_LENGTH_MEASURE(2.E-2),#67);
#109=PRESENTATION_STYLE_ASSIGNMENT((#108));
#110=STYLED_ITEM('',(#109),#107);
#111=CARTESIAN_POINT('',(2.15E1,0.E0,7.5E0));
#112=DIRECTION('',(0.E0,1.E0,0.E0));
#113=DIRECTION('',(1.E0,0.E0,0.E0));
#114=AXIS2_PLACEMENT_3D('',#111,#112,#113);
#116=CURVE_STYLE('',#99,POSITIVE_LENGTH_MEASURE(2.E-2),#67);
#117=PRESENTATION_STYLE_ASSIGNMENT((#116));
#118=STYLED_ITEM('',(#117),#115);
#119=CARTESIAN_POINT('',(2.15E1,0.E0,7.5E0));
#120=DIRECTION('',(0.E0,1.E0,0.E0));
#121=DIRECTION('',(-1.E0,0.E0,0.E0));
#122=AXIS2_PLACEMENT_3D('',#119,#120,#121);
#124=CURVE_STYLE('',#99,POSITIVE_LENGTH_MEASURE(2.E-2),#67);
#125=PRESENTATION_STYLE_ASSIGNMENT((#124));
#126=STYLED_ITEM('',(#125),#123);
#127=CARTESIAN_POINT('',(3.25E1,0.E0,-7.5E0));
#128=DIRECTION('',(0.E0,1.E0,0.E0));
#129=DIRECTION('',(1.E0,0.E0,0.E0));
#130=AXIS2_PLACEMENT_3D('',#127,#128,#129);
#132=CURVE_STYLE('',#99,POSITIVE_LENGTH_MEASURE(2.E-2),#67);
#133=PRESENTATION_STYLE_ASSIGNMENT((#132));
#134=STYLED_ITEM('',(#133),#131);
#135=CARTESIAN_POINT('',(3.25E1,0.E0,-7.5E0));
#136=DIRECTION('',(0.E0,1.E0,0.E0));
#137=DIRECTION('',(-1.E0,0.E0,0.E0));
#138=AXIS2_PLACEMENT_3D('',#135,#136,#137);
#140=CURVE_STYLE('',#99,POSITIVE_LENGTH_MEASURE(2.E-2),#67);
#141=PRESENTATION_STYLE_ASSIGNMENT((#140));
#142=STYLED_ITEM('',(#141),#139);
#143=CARTESIAN_POINT('',(-3.25E1,0.E0,7.5E0));
#144=DIRECTION('',(0.E0,1.E0,0.E0));
#145=DIRECTION('',(1.E0,0.E0,0.E0));
#146=AXIS2_PLACEMENT_3D('',#143,#144,#145);
#148=CURVE_STYLE('',#99,POSITIVE_LENGTH_MEASURE(2.E-2),#67);
#149=PRESENTATION_STYLE_ASSIGNMENT((#148));
#150=STYLED_ITEM('',(#149),#147);
#151=CARTESIAN_POINT('',(-3.25E1,0.E0,7.5E0));
#152=DIRECTION('',(0.E0,1.E0,0.E0));
#153=DIRECTION('',(-1.E0,0.E0,0.E0));
#154=AXIS2_PLACEMENT_3D('',#151,#152,#153);
#156=CURVE_STYLE('',#99,POSITIVE_LENGTH_MEASURE(2.E-2),#67);
#157=PRESENTATION_STYLE_ASSIGNMENT((#156));
#158=STYLED_ITEM('',(#157),#155);
#159=CARTESIAN_POINT('',(-2.143768445330E1,0.E0,2.5E0));
#160=DIRECTION('',(0.E0,-1.E0,0.E0));
#161=DIRECTION('',(-2.492234751448E-2,0.E0,-9.996893900579E-1));
#162=AXIS2_PLACEMENT_3D('',#159,#160,#161);
#164=CURVE_STYLE('',#99,POSITIVE_LENGTH_MEASURE(2.E-2),#67);
#165=PRESENTATION_STYLE_ASSIGNMENT((#164));
#166=STYLED_ITEM('',(#165),#163);
#167=DIRECTION('',(-1.E0,0.E0,0.E0));
#168=VECTOR('',#167,4.287536890660E1);
#169=CARTESIAN_POINT('',(2.143768445330E1,0.E0,-2.5E0));
#170=LINE('',#169,#168);
#171=CURVE_STYLE('',#99,POSITIVE_LENGTH_MEASURE(2.E-2),#67);
#172=PRESENTATION_STYLE_ASSIGNMENT((#171));
#173=STYLED_ITEM('',(#172),#170);
#174=CARTESIAN_POINT('',(2.143768445330E1,0.E0,2.5E0));
#175=DIRECTION('',(0.E0,-1.E0,0.E0));
#176=DIRECTION('',(0.E0,0.E0,-1.E0));
#177=AXIS2_PLACEMENT_3D('',#174,#175,#176);
#179=CURVE_STYLE('',#99,POSITIVE_LENGTH_MEASURE(2.E-2),#67);
#180=PRESENTATION_STYLE_ASSIGNMENT((#179));
#181=STYLED_ITEM('',(#180),#178);
#182=DIRECTION('',(-9.996893900579E-1,0.E0,-2.492234751448E-2));
#183=VECTOR('',#182,9.996884222665E0);
#184=CARTESIAN_POINT('',(3.155607528191E1,0.E0,-2.249301127630E0));
#185=LINE('',#184,#183);
#186=CURVE_STYLE('',#99,POSITIVE_LENGTH_MEASURE(2.E-2),#67);
#187=PRESENTATION_STYLE_ASSIGNMENT((#186));
#188=STYLED_ITEM('',(#187),#185);
#189=DIRECTION('',(9.996893900579E-1,0.E0,-2.492234751448E-2));
#190=VECTOR('',#189,9.996884222665E0);
#191=CARTESIAN_POINT('',(2.156229619087E1,0.E0,2.498446950290E0));
#192=LINE('',#191,#190);
#193=CURVE_STYLE('',#99,POSITIVE_LENGTH_MEASURE(2.E-2),#67);
#194=PRESENTATION_STYLE_ASSIGNMENT((#193));
#195=STYLED_ITEM('',(#194),#192);
#196=CARTESIAN_POINT('',(2.143768445330E1,0.E0,-2.5E0));
#197=DIRECTION('',(0.E0,-1.E0,0.E0));
#198=DIRECTION('',(2.492234751448E-2,0.E0,9.996893900579E-1));
#199=AXIS2_PLACEMENT_3D('',#196,#197,#198);
#201=CURVE_STYLE('',#99,POSITIVE_LENGTH_MEASURE(2.E-2),#67);
#202=PRESENTATION_STYLE_ASSIGNMENT((#201));
#203=STYLED_ITEM('',(#202),#200);
#204=DIRECTION('',(1.E0,0.E0,0.E0));
#205=VECTOR('',#204,4.287536890660E1);
#206=CARTESIAN_POINT('',(-2.143768445330E1,0.E0,2.5E0));
#207=LINE('',#206,#205);
#208=CURVE_STYLE('',#99,POSITIVE_LENGTH_MEASURE(2.E-2),#67);
#209=PRESENTATION_STYLE_ASSIGNMENT((#208));
#210=STYLED_ITEM('',(#209),#207);
#211=CARTESIAN_POINT('',(-2.143768445330E1,0.E0,-2.5E0));
#212=DIRECTION('',(0.E0,-1.E0,0.E0));
#213=DIRECTION('',(0.E0,0.E0,1.E0));
#214=AXIS2_PLACEMENT_3D('',#211,#212,#213);
#216=CURVE_STYLE('',#99,POSITIVE_LENGTH_MEASURE(2.E-2),#67);
#217=PRESENTATION_STYLE_ASSIGNMENT((#216));
#218=STYLED_ITEM('',(#217),#215);
#219=DIRECTION('',(9.996893900579E-1,0.E0,2.492234751448E-2));
#220=VECTOR('',#219,9.996884222665E0);
#221=CARTESIAN_POINT('',(-3.155607528191E1,0.E0,2.249301127630E0));
#222=LINE('',#221,#220);
#223=CURVE_STYLE('',#99,POSITIVE_LENGTH_MEASURE(2.E-2),#67);
#224=PRESENTATION_STYLE_ASSIGNMENT((#223));
#225=STYLED_ITEM('',(#224),#222);
#226=DIRECTION('',(-9.996893900579E-1,0.E0,2.492234751448E-2));
#227=VECTOR('',#226,9.996884222665E0);
#228=CARTESIAN_POINT('',(-2.156229619087E1,0.E0,-2.498446950290E0));
#229=LINE('',#228,#227);
#230=CURVE_STYLE('',#99,POSITIVE_LENGTH_MEASURE(2.E-2),#67);
#231=PRESENTATION_STYLE_ASSIGNMENT((#230));
#232=STYLED_ITEM('',(#231),#229);
#233=DIRECTION('',(7.071067811865E-1,0.E0,-7.071067811865E-1));
#234=VECTOR('',#233,7.071067811865E0);
#235=CARTESIAN_POINT('',(-3.75E1,0.E0,-7.5E0));
#236=LINE('',#235,#234);
#237=CURVE_STYLE('',#99,POSITIVE_LENGTH_MEASURE(2.E-2),#67);
#238=PRESENTATION_STYLE_ASSIGNMENT((#237));
#239=STYLED_ITEM('',(#238),#236);
#240=DIRECTION('',(0.E0,0.E0,1.E0));
#241=VECTOR('',#240,2.E1);
#242=CARTESIAN_POINT('',(-3.75E1,0.E0,-7.5E0));
#243=LINE('',#242,#241);
#244=CURVE_STYLE('',#99,POSITIVE_LENGTH_MEASURE(2.E-2),#67);
#245=PRESENTATION_STYLE_ASSIGNMENT((#244));
#246=STYLED_ITEM('',(#245),#243);
#247=DIRECTION('',(1.E0,0.E0,0.E0));
#248=VECTOR('',#247,7.5E1);
#249=CARTESIAN_POINT('',(-3.75E1,0.E0,1.25E1));
#250=LINE('',#249,#248);
#251=CURVE_STYLE('',#99,POSITIVE_LENGTH_MEASURE(2.E-2),#67);
#252=PRESENTATION_STYLE_ASSIGNMENT((#251));
#253=STYLED_ITEM('',(#252),#250);
#254=DIRECTION('',(0.E0,0.E0,-1.E0));
#255=VECTOR('',#254,2.5E1);
#256=CARTESIAN_POINT('',(3.75E1,0.E0,1.25E1));
#257=LINE('',#256,#255);
#258=CURVE_STYLE('',#99,POSITIVE_LENGTH_MEASURE(2.E-2),#67);
#259=PRESENTATION_STYLE_ASSIGNMENT((#258));
#260=STYLED_ITEM('',(#259),#257);
#261=DIRECTION('',(-1.E0,0.E0,0.E0));
#262=VECTOR('',#261,7.E1);
#263=CARTESIAN_POINT('',(3.75E1,0.E0,-1.25E1));
#264=LINE('',#263,#262);
#265=CURVE_STYLE('',#99,POSITIVE_LENGTH_MEASURE(2.E-2),#67);
#266=PRESENTATION_STYLE_ASSIGNMENT((#265));
#267=STYLED_ITEM('',(#266),#264);
#268=DIRECTION('',(0.E0,1.E0,0.E0));
#269=VECTOR('',#268,3.E-1);
#270=CARTESIAN_POINT('',(-1.925E1,0.E0,-7.5E0));
#271=LINE('',#270,#269);
#272=CURVE_STYLE('',#99,POSITIVE_LENGTH_MEASURE(2.E-2),#67);
#273=PRESENTATION_STYLE_ASSIGNMENT((#272));
#274=STYLED_ITEM('',(#273),#271);
#275=DIRECTION('',(0.E0,1.E0,0.E0));
#276=VECTOR('',#275,3.E-1);
#277=CARTESIAN_POINT('',(-2.375E1,0.E0,-7.5E0));
#278=LINE('',#277,#276);
#279=CURVE_STYLE('',#99,POSITIVE_LENGTH_MEASURE(2.E-2),#67);
#280=PRESENTATION_STYLE_ASSIGNMENT((#279));
#281=STYLED_ITEM('',(#280),#278);
#282=CARTESIAN_POINT('',(-2.15E1,3.E-1,-7.5E0));
#283=DIRECTION('',(0.E0,1.E0,0.E0));
#284=DIRECTION('',(1.E0,0.E0,0.E0));
#285=AXIS2_PLACEMENT_3D('',#282,#283,#284);
#287=CURVE_STYLE('',#99,POSITIVE_LENGTH_MEASURE(2.E-2),#67);
#288=PRESENTATION_STYLE_ASSIGNMENT((#287));
#289=STYLED_ITEM('',(#288),#286);
#290=CARTESIAN_POINT('',(-2.15E1,3.E-1,-7.5E0));
#291=DIRECTION('',(0.E0,1.E0,0.E0));
#292=DIRECTION('',(-1.E0,0.E0,0.E0));
#293=AXIS2_PLACEMENT_3D('',#290,#291,#292);
#295=CURVE_STYLE('',#99,POSITIVE_LENGTH_MEASURE(2.E-2),#67);
#296=PRESENTATION_STYLE_ASSIGNMENT((#295));
#297=STYLED_ITEM('',(#296),#294);
#298=CARTESIAN_POINT('',(2.15E1,3.E-1,7.5E0));
#299=DIRECTION('',(0.E0,1.E0,0.E0));
#300=DIRECTION('',(1.E0,0.E0,0.E0));
#301=AXIS2_PLACEMENT_3D('',#298,#299,#300);
#303=CURVE_STYLE('',#99,POSITIVE_LENGTH_MEASURE(2.E-2),#67);
#304=PRESENTATION_STYLE_ASSIGNMENT((#303));
#305=STYLED_ITEM('',(#304),#302);
#306=CARTESIAN_POINT('',(2.15E1,3.E-1,7.5E0));
#307=DIRECTION('',(0.E0,1.E0,0.E0));
#308=DIRECTION('',(-1.E0,0.E0,0.E0));
#309=AXIS2_PLACEMENT_3D('',#306,#307,#308);
#311=CURVE_STYLE('',#99,POSITIVE_LENGTH_MEASURE(2.E-2),#67);
#312=PRESENTATION_STYLE_ASSIGNMENT((#311));
#313=STYLED_ITEM('',(#312),#310);
#314=CARTESIAN_POINT('',(3.25E1,3.E-1,-7.5E0));
#315=DIRECTION('',(0.E0,1.E0,0.E0));
#316=DIRECTION('',(1.E0,0.E0,0.E0));
#317=AXIS2_PLACEMENT_3D('',#314,#315,#316);
#319=CURVE_STYLE('',#99,POSITIVE_LENGTH_MEASURE(2.E-2),#67);
#320=PRESENTATION_STYLE_ASSIGNMENT((#319));
#321=STYLED_ITEM('',(#320),#318);
#322=CARTESIAN_POINT('',(3.25E1,3.E-1,-7.5E0));
#323=DIRECTION('',(0.E0,1.E0,0.E0));
#324=DIRECTION('',(-1.E0,0.E0,0.E0));
#325=AXIS2_PLACEMENT_3D('',#322,#323,#324);
#327=CURVE_STYLE('',#99,POSITIVE_LENGTH_MEASURE(2.E-2),#67);
#328=PRESENTATION_STYLE_ASSIGNMENT((#327));
#329=STYLED_ITEM('',(#328),#326);
#330=CARTESIAN_POINT('',(-3.25E1,3.E-1,7.5E0));
#331=DIRECTION('',(0.E0,1.E0,0.E0));
#332=DIRECTION('',(1.E0,0.E0,0.E0));
#333=AXIS2_PLACEMENT_3D('',#330,#331,#332);
#335=CURVE_STYLE('',#99,POSITIVE_LENGTH_MEASURE(2.E-2),#67);
#336=PRESENTATION_STYLE_ASSIGNMENT((#335));
#337=STYLED_ITEM('',(#336),#334);
#338=CARTESIAN_POINT('',(-3.25E1,3.E-1,7.5E0));
#339=DIRECTION('',(0.E0,1.E0,0.E0));
#340=DIRECTION('',(-1.E0,0.E0,0.E0));
#341=AXIS2_PLACEMENT_3D('',#338,#339,#340);
#343=CURVE_STYLE('',#99,POSITIVE_LENGTH_MEASURE(2.E-2),#67);
#344=PRESENTATION_STYLE_ASSIGNMENT((#343));
#345=STYLED_ITEM('',(#344),#342);
#346=CARTESIAN_POINT('',(-2.143768445330E1,3.E-1,2.5E0));
#347=DIRECTION('',(0.E0,1.E0,0.E0));
#348=DIRECTION('',(0.E0,0.E0,-1.E0));
#349=AXIS2_PLACEMENT_3D('',#346,#347,#348);
#351=CURVE_STYLE('',#99,POSITIVE_LENGTH_MEASURE(2.E-2),#67);
#352=PRESENTATION_STYLE_ASSIGNMENT((#351));
#353=STYLED_ITEM('',(#352),#350);
#354=DIRECTION('',(-9.996893900579E-1,0.E0,2.492234751448E-2));
#355=VECTOR('',#354,9.996884222665E0);
#356=CARTESIAN_POINT('',(-2.156229619087E1,3.E-1,-2.498446950290E0));
#357=LINE('',#356,#355);
#358=CURVE_STYLE('',#99,POSITIVE_LENGTH_MEASURE(2.E-2),#67);
#359=PRESENTATION_STYLE_ASSIGNMENT((#358));
#360=STYLED_ITEM('',(#359),#357);
#361=DIRECTION('',(9.996893900579E-1,0.E0,2.492234751448E-2));
#362=VECTOR('',#361,9.996884222665E0);
#363=CARTESIAN_POINT('',(-3.155607528191E1,3.E-1,2.249301127630E0));
#364=LINE('',#363,#362);
#365=CURVE_STYLE('',#99,POSITIVE_LENGTH_MEASURE(2.E-2),#67);
#366=PRESENTATION_STYLE_ASSIGNMENT((#365));
#367=STYLED_ITEM('',(#366),#364);
#368=CARTESIAN_POINT('',(-2.143768445330E1,3.E-1,-2.5E0));
#369=DIRECTION('',(0.E0,1.E0,0.E0));
#370=DIRECTION('',(-2.492234751448E-2,0.E0,9.996893900579E-1));
#371=AXIS2_PLACEMENT_3D('',#368,#369,#370);
#373=CURVE_STYLE('',#99,POSITIVE_LENGTH_MEASURE(2.E-2),#67);
#374=PRESENTATION_STYLE_ASSIGNMENT((#373));
#375=STYLED_ITEM('',(#374),#372);
#376=DIRECTION('',(1.E0,0.E0,0.E0));
#377=VECTOR('',#376,4.287536890660E1);
#378=CARTESIAN_POINT('',(-2.143768445330E1,3.E-1,2.5E0));
#379=LINE('',#378,#377);
#380=CURVE_STYLE('',#99,POSITIVE_LENGTH_MEASURE(2.E-2),#67);
#381=PRESENTATION_STYLE_ASSIGNMENT((#380));
#382=STYLED_ITEM('',(#381),#379);
#383=CARTESIAN_POINT('',(2.143768445330E1,3.E-1,-2.5E0));
#384=DIRECTION('',(0.E0,1.E0,0.E0));
#385=DIRECTION('',(0.E0,0.E0,1.E0));
#386=AXIS2_PLACEMENT_3D('',#383,#384,#385);
#388=CURVE_STYLE('',#99,POSITIVE_LENGTH_MEASURE(2.E-2),#67);
#389=PRESENTATION_STYLE_ASSIGNMENT((#388));
#390=STYLED_ITEM('',(#389),#387);
#391=DIRECTION('',(9.996893900579E-1,0.E0,-2.492234751448E-2));
#392=VECTOR('',#391,9.996884222665E0);
#393=CARTESIAN_POINT('',(2.156229619087E1,3.E-1,2.498446950290E0));
#394=LINE('',#393,#392);
#395=CURVE_STYLE('',#99,POSITIVE_LENGTH_MEASURE(2.E-2),#67);
#396=PRESENTATION_STYLE_ASSIGNMENT((#395));
#397=STYLED_ITEM('',(#396),#394);
#398=DIRECTION('',(-9.996893900579E-1,0.E0,-2.492234751448E-2));
#399=VECTOR('',#398,9.996884222665E0);
#400=CARTESIAN_POINT('',(3.155607528191E1,3.E-1,-2.249301127630E0));
#401=LINE('',#400,#399);
#402=CURVE_STYLE('',#99,POSITIVE_LENGTH_MEASURE(2.E-2),#67);
#403=PRESENTATION_STYLE_ASSIGNMENT((#402));
#404=STYLED_ITEM('',(#403),#401);
#405=CARTESIAN_POINT('',(2.143768445330E1,3.E-1,2.5E0));
#406=DIRECTION('',(0.E0,1.E0,0.E0));
#407=DIRECTION('',(2.492234751448E-2,0.E0,-9.996893900579E-1));
#408=AXIS2_PLACEMENT_3D('',#405,#406,#407);
#410=CURVE_STYLE('',#99,POSITIVE_LENGTH_MEASURE(2.E-2),#67);
#411=PRESENTATION_STYLE_ASSIGNMENT((#410));
#412=STYLED_ITEM('',(#411),#409);
#413=DIRECTION('',(-1.E0,0.E0,0.E0));
#414=VECTOR('',#413,4.287536890660E1);
#415=CARTESIAN_POINT('',(2.143768445330E1,3.E-1,-2.5E0));
#416=LINE('',#415,#414);
#417=CURVE_STYLE('',#99,POSITIVE_LENGTH_MEASURE(2.E-2),#67);
#418=PRESENTATION_STYLE_ASSIGNMENT((#417));
#419=STYLED_ITEM('',(#418),#416);
#420=DIRECTION('',(-7.071067811865E-1,0.E0,7.071067811865E-1));
#421=VECTOR('',#420,7.071067811865E0);
#422=CARTESIAN_POINT('',(-3.25E1,3.E-1,-1.25E1));
#423=LINE('',#422,#421);
#424=CURVE_STYLE('',#99,POSITIVE_LENGTH_MEASURE(2.E-2),#67);
#425=PRESENTATION_STYLE_ASSIGNMENT((#424));
#426=STYLED_ITEM('',(#425),#423);
#427=DIRECTION('',(-1.E0,0.E0,0.E0));
#428=VECTOR('',#427,7.E1);
#429=CARTESIAN_POINT('',(3.75E1,3.E-1,-1.25E1));
#430=LINE('',#429,#428);
#431=CURVE_STYLE('',#99,POSITIVE_LENGTH_MEASURE(2.E-2),#67);
#432=PRESENTATION_STYLE_ASSIGNMENT((#431));
#433=STYLED_ITEM('',(#432),#430);
#434=DIRECTION('',(0.E0,0.E0,-1.E0));
#435=VECTOR('',#434,2.5E1);
#436=CARTESIAN_POINT('',(3.75E1,3.E-1,1.25E1));
#437=LINE('',#436,#435);
#438=CURVE_STYLE('',#99,POSITIVE_LENGTH_MEASURE(2.E-2),#67);
#439=PRESENTATION_STYLE_ASSIGNMENT((#438));
#440=STYLED_ITEM('',(#439),#437);
#441=DIRECTION('',(1.E0,0.E0,0.E0));
#442=VECTOR('',#441,7.5E1);
#443=CARTESIAN_POINT('',(-3.75E1,3.E-1,1.25E1));
#444=LINE('',#443,#442);
#445=CURVE_STYLE('',#99,POSITIVE_LENGTH_MEASURE(2.E-2),#67);
#446=PRESENTATION_STYLE_ASSIGNMENT((#445));
#447=STYLED_ITEM('',(#446),#444);
#448=DIRECTION('',(0.E0,0.E0,1.E0));
#449=VECTOR('',#448,2.E1);
#450=CARTESIAN_POINT('',(-3.75E1,3.E-1,-7.5E0));
#451=LINE('',#450,#449);
#452=CURVE_STYLE('',#99,POSITIVE_LENGTH_MEASURE(2.E-2),#67);
#453=PRESENTATION_STYLE_ASSIGNMENT((#452));
#454=STYLED_ITEM('',(#453),#451);
#455=DIRECTION('',(0.E0,1.E0,0.E0));
#456=VECTOR('',#455,3.E-1);
#457=CARTESIAN_POINT('',(2.375E1,0.E0,7.5E0));
#458=LINE('',#457,#456);
#459=CURVE_STYLE('',#99,POSITIVE_LENGTH_MEASURE(2.E-2),#67);
#460=PRESENTATION_STYLE_ASSIGNMENT((#459));
#461=STYLED_ITEM('',(#460),#458);
#462=DIRECTION('',(0.E0,1.E0,0.E0));
#463=VECTOR('',#462,3.E-1);
#464=CARTESIAN_POINT('',(1.925E1,0.E0,7.5E0));
#465=LINE('',#464,#463);
#466=CURVE_STYLE('',#99,POSITIVE_LENGTH_MEASURE(2.E-2),#67);
#467=PRESENTATION_STYLE_ASSIGNMENT((#466));
#468=STYLED_ITEM('',(#467),#465);
#469=DIRECTION('',(0.E0,1.E0,0.E0));
#470=VECTOR('',#469,3.E-1);
#471=CARTESIAN_POINT('',(3.35E1,0.E0,-7.5E0));
#472=LINE('',#471,#470);
#473=CURVE_STYLE('',#99,POSITIVE_LENGTH_MEASURE(2.E-2),#67);
#474=PRESENTATION_STYLE_ASSIGNMENT((#473));
#475=STYLED_ITEM('',(#474),#472);
#476=DIRECTION('',(0.E0,1.E0,0.E0));
#477=VECTOR('',#476,3.E-1);
#478=CARTESIAN_POINT('',(3.15E1,0.E0,-7.5E0));
#479=LINE('',#478,#477);
#480=CURVE_STYLE('',#99,POSITIVE_LENGTH_MEASURE(2.E-2),#67);
#481=PRESENTATION_STYLE_ASSIGNMENT((#480));
#482=STYLED_ITEM('',(#481),#479);
#483=DIRECTION('',(0.E0,1.E0,0.E0));
#484=VECTOR('',#483,3.E-1);
#485=CARTESIAN_POINT('',(-3.15E1,0.E0,7.5E0));
#486=LINE('',#485,#484);
#487=CURVE_STYLE('',#99,POSITIVE_LENGTH_MEASURE(2.E-2),#67);
#488=PRESENTATION_STYLE_ASSIGNMENT((#487));
#489=STYLED_ITEM('',(#488),#486);
#490=DIRECTION('',(0.E0,1.E0,0.E0));
#491=VECTOR('',#490,3.E-1);
#492=CARTESIAN_POINT('',(-3.35E1,0.E0,7.5E0));
#493=LINE('',#492,#491);
#494=CURVE_STYLE('',#99,POSITIVE_LENGTH_MEASURE(2.E-2),#67);
#495=PRESENTATION_STYLE_ASSIGNMENT((#494));
#496=STYLED_ITEM('',(#495),#493);
#497=DIRECTION('',(3.552713678801E-14,-1.E0,0.E0));
#498=VECTOR('',#497,3.E-1);
#499=CARTESIAN_POINT('',(-2.143768445330E1,3.E-1,-2.5E0));
#500=LINE('',#499,#498);
#501=CURVE_STYLE('',#99,POSITIVE_LENGTH_MEASURE(2.E-2),#67);
#502=PRESENTATION_STYLE_ASSIGNMENT((#501));
#503=STYLED_ITEM('',(#502),#500);
#504=DIRECTION('',(0.E0,-1.E0,0.E0));
#505=VECTOR('',#504,3.E-1);
#506=CARTESIAN_POINT('',(2.143768445330E1,3.E-1,-2.5E0));
#507=LINE('',#506,#505);
#508=CURVE_STYLE('',#99,POSITIVE_LENGTH_MEASURE(2.E-2),#67);
#509=PRESENTATION_STYLE_ASSIGNMENT((#508));
#510=STYLED_ITEM('',(#509),#507);
#511=DIRECTION('',(0.E0,-1.E0,0.E0));
#512=VECTOR('',#511,3.E-1);
#513=CARTESIAN_POINT('',(2.156229619087E1,3.E-1,-2.498446950290E0));
#514=LINE('',#513,#512);
#515=CURVE_STYLE('',#99,POSITIVE_LENGTH_MEASURE(2.E-2),#67);
#516=PRESENTATION_STYLE_ASSIGNMENT((#515));
#517=STYLED_ITEM('',(#516),#514);
#518=CARTESIAN_POINT('',(3.15E1,3.E-1,0.E0));
#519=DIRECTION('',(0.E0,-1.E0,0.E0));
#520=DIRECTION('',(2.492234751448E-2,0.E0,-9.996893900579E-1));
#521=AXIS2_PLACEMENT_3D('',#518,#519,#520);
#523=CURVE_STYLE('',#99,POSITIVE_LENGTH_MEASURE(2.E-2),#67);
#524=PRESENTATION_STYLE_ASSIGNMENT((#523));
#525=STYLED_ITEM('',(#524),#522);
#526=DIRECTION('',(0.E0,1.E0,0.E0));
#527=VECTOR('',#526,3.E-1);
#528=CARTESIAN_POINT('',(3.155607528191E1,0.E0,2.249301127630E0));
#529=LINE('',#528,#527);
#530=CURVE_STYLE('',#99,POSITIVE_LENGTH_MEASURE(2.E-2),#67);
#531=PRESENTATION_STYLE_ASSIGNMENT((#530));
#532=STYLED_ITEM('',(#531),#529);
#533=CARTESIAN_POINT('',(3.15E1,0.E0,0.E0));
#534=DIRECTION('',(0.E0,1.E0,0.E0));
#535=DIRECTION('',(2.492234751448E-2,0.E0,9.996893900579E-1));
#536=AXIS2_PLACEMENT_3D('',#533,#534,#535);
#538=CURVE_STYLE('',#99,POSITIVE_LENGTH_MEASURE(2.E-2),#67);
#539=PRESENTATION_STYLE_ASSIGNMENT((#538));
#540=STYLED_ITEM('',(#539),#537);
#541=DIRECTION('',(0.E0,1.E0,0.E0));
#542=VECTOR('',#541,3.E-1);
#543=CARTESIAN_POINT('',(3.155607528191E1,0.E0,-2.249301127630E0));
#544=LINE('',#543,#542);
#545=CURVE_STYLE('',#99,POSITIVE_LENGTH_MEASURE(2.E-2),#67);
#546=PRESENTATION_STYLE_ASSIGNMENT((#545));
#547=STYLED_ITEM('',(#546),#544);
#548=DIRECTION('',(1.184237892934E-14,-1.E0,0.E0));
#549=VECTOR('',#548,3.E-1);
#550=CARTESIAN_POINT('',(2.156229619087E1,3.E-1,2.498446950290E0));
#551=LINE('',#550,#549);
#552=CURVE_STYLE('',#99,POSITIVE_LENGTH_MEASURE(2.E-2),#67);
#553=PRESENTATION_STYLE_ASSIGNMENT((#552));
#554=STYLED_ITEM('',(#553),#551);
#555=DIRECTION('',(0.E0,-1.E0,0.E0));
#556=VECTOR('',#555,3.E-1);
#557=CARTESIAN_POINT('',(-2.143768445330E1,3.E-1,2.5E0));
#558=LINE('',#557,#556);
#559=CURVE_STYLE('',#99,POSITIVE_LENGTH_MEASURE(2.E-2),#67);
#560=PRESENTATION_STYLE_ASSIGNMENT((#559));
#561=STYLED_ITEM('',(#560),#558);
#562=DIRECTION('',(2.368475785867E-14,-1.E0,0.E0));
#563=VECTOR('',#562,3.E-1);
#564=CARTESIAN_POINT('',(2.143768445330E1,3.E-1,2.5E0));
#565=LINE('',#564,#563);
#566=CURVE_STYLE('',#99,POSITIVE_LENGTH_MEASURE(2.E-2),#67);
#567=PRESENTATION_STYLE_ASSIGNMENT((#566));
#568=STYLED_ITEM('',(#567),#565);
#569=DIRECTION('',(0.E0,-1.E0,0.E0));
#570=VECTOR('',#569,3.E-1);
#571=CARTESIAN_POINT('',(-2.156229619087E1,3.E-1,2.498446950290E0));
#572=LINE('',#571,#570);
#573=CURVE_STYLE('',#99,POSITIVE_LENGTH_MEASURE(2.E-2),#67);
#574=PRESENTATION_STYLE_ASSIGNMENT((#573));
#575=STYLED_ITEM('',(#574),#572);
#576=CARTESIAN_POINT('',(-3.15E1,0.E0,0.E0));
#577=DIRECTION('',(0.E0,1.E0,0.E0));
#578=DIRECTION('',(-2.492234751448E-2,0.E0,-9.996893900579E-1));
#579=AXIS2_PLACEMENT_3D('',#576,#577,#578);
#581=CURVE_STYLE('',#99,POSITIVE_LENGTH_MEASURE(2.E-2),#67);
#582=PRESENTATION_STYLE_ASSIGNMENT((#581));
#583=STYLED_ITEM('',(#582),#580);
#584=DIRECTION('',(0.E0,1.E0,0.E0));
#585=VECTOR('',#584,3.E-1);
#586=CARTESIAN_POINT('',(-3.155607528191E1,0.E0,2.249301127630E0));
#587=LINE('',#586,#585);
#588=CURVE_STYLE('',#99,POSITIVE_LENGTH_MEASURE(2.E-2),#67);
#589=PRESENTATION_STYLE_ASSIGNMENT((#588));
#590=STYLED_ITEM('',(#589),#587);
#591=CARTESIAN_POINT('',(-3.15E1,3.E-1,0.E0));
#592=DIRECTION('',(0.E0,-1.E0,0.E0));
#593=DIRECTION('',(-2.492234751448E-2,0.E0,9.996893900579E-1));
#594=AXIS2_PLACEMENT_3D('',#591,#592,#593);
#596=CURVE_STYLE('',#99,POSITIVE_LENGTH_MEASURE(2.E-2),#67);
#597=PRESENTATION_STYLE_ASSIGNMENT((#596));
#598=STYLED_ITEM('',(#597),#595);
#599=DIRECTION('',(0.E0,1.E0,0.E0));
#600=VECTOR('',#599,3.E-1);
#601=CARTESIAN_POINT('',(-3.155607528191E1,0.E0,-2.249301127630E0));
#602=LINE('',#601,#600);
#603=CURVE_STYLE('',#99,POSITIVE_LENGTH_MEASURE(2.E-2),#67);
#604=PRESENTATION_STYLE_ASSIGNMENT((#603));
#605=STYLED_ITEM('',(#604),#602);
#606=DIRECTION('',(3.552713678801E-14,-1.E0,0.E0));
#607=VECTOR('',#606,3.E-1);
#608=CARTESIAN_POINT('',(-2.156229619087E1,3.E-1,-2.498446950290E0));
#609=LINE('',#608,#607);
#610=CURVE_STYLE('',#99,POSITIVE_LENGTH_MEASURE(2.E-2),#67);
#611=PRESENTATION_STYLE_ASSIGNMENT((#610));
#612=STYLED_ITEM('',(#611),#609);
#613=DIRECTION('',(0.E0,-1.E0,0.E0));
#614=VECTOR('',#613,3.E-1);
#615=CARTESIAN_POINT('',(-3.25E1,3.E-1,-1.25E1));
#616=LINE('',#615,#614);
#617=CURVE_STYLE('',#99,POSITIVE_LENGTH_MEASURE(2.E-2),#67);
#618=PRESENTATION_STYLE_ASSIGNMENT((#617));
#619=STYLED_ITEM('',(#618),#616);
#620=DIRECTION('',(0.E0,1.E0,0.E0));
#621=VECTOR('',#620,3.E-1);
#622=CARTESIAN_POINT('',(3.75E1,0.E0,-1.25E1));
#623=LINE('',#622,#621);
#624=CURVE_STYLE('',#99,POSITIVE_LENGTH_MEASURE(2.E-2),#67);
#625=PRESENTATION_STYLE_ASSIGNMENT((#624));
#626=STYLED_ITEM('',(#625),#623);
#627=DIRECTION('',(0.E0,1.E0,0.E0));
#628=VECTOR('',#627,3.E-1);
#629=CARTESIAN_POINT('',(3.75E1,0.E0,1.25E1));
#630=LINE('',#629,#628);
#631=CURVE_STYLE('',#99,POSITIVE_LENGTH_MEASURE(2.E-2),#67);
#632=PRESENTATION_STYLE_ASSIGNMENT((#631));
#633=STYLED_ITEM('',(#632),#630);
#634=DIRECTION('',(0.E0,1.E0,0.E0));
#635=VECTOR('',#634,3.E-1);
#636=CARTESIAN_POINT('',(-3.75E1,0.E0,1.25E1));
#637=LINE('',#636,#635);
#638=CURVE_STYLE('',#99,POSITIVE_LENGTH_MEASURE(2.E-2),#67);
#639=PRESENTATION_STYLE_ASSIGNMENT((#638));
#640=STYLED_ITEM('',(#639),#637);
#641=DIRECTION('',(0.E0,-1.E0,0.E0));
#642=VECTOR('',#641,3.E-1);
#643=CARTESIAN_POINT('',(-3.75E1,3.E-1,-7.5E0));
#644=LINE('',#643,#642);
#645=CURVE_STYLE('',#99,POSITIVE_LENGTH_MEASURE(2.E-2),#67);
#646=PRESENTATION_STYLE_ASSIGNMENT((#645));
#647=STYLED_ITEM('',(#646),#644);
#648=CARTESIAN_POINT('',(-3.75E1,0.E0,1.25E1));
#649=CARTESIAN_POINT('',(3.75E1,0.E0,1.25E1));
#650=VERTEX_POINT('',#648);
#651=VERTEX_POINT('',#649);
#652=CARTESIAN_POINT('',(3.75E1,0.E0,-1.25E1));
#653=VERTEX_POINT('',#652);
#654=CARTESIAN_POINT('',(-3.75E1,3.E-1,1.25E1));
#655=CARTESIAN_POINT('',(3.75E1,3.E-1,1.25E1));
#656=VERTEX_POINT('',#654);
#657=VERTEX_POINT('',#655);
#658=CARTESIAN_POINT('',(3.75E1,3.E-1,-1.25E1));
#659=VERTEX_POINT('',#658);
#660=CARTESIAN_POINT('',(-1.925E1,0.E0,-7.5E0));
#661=CARTESIAN_POINT('',(-2.375E1,0.E0,-7.5E0));
#662=VERTEX_POINT('',#660);
#663=VERTEX_POINT('',#661);
#664=CARTESIAN_POINT('',(2.375E1,0.E0,7.5E0));
#665=CARTESIAN_POINT('',(1.925E1,0.E0,7.5E0));
#666=VERTEX_POINT('',#664);
#667=VERTEX_POINT('',#665);
#668=CARTESIAN_POINT('',(-1.925E1,3.E-1,-7.5E0));
#669=CARTESIAN_POINT('',(-2.375E1,3.E-1,-7.5E0));
#670=VERTEX_POINT('',#668);
#671=VERTEX_POINT('',#669);
#672=CARTESIAN_POINT('',(2.375E1,3.E-1,7.5E0));
#673=CARTESIAN_POINT('',(1.925E1,3.E-1,7.5E0));
#674=VERTEX_POINT('',#672);
#675=VERTEX_POINT('',#673);
#676=CARTESIAN_POINT('',(3.35E1,0.E0,-7.5E0));
#677=CARTESIAN_POINT('',(3.15E1,0.E0,-7.5E0));
#678=VERTEX_POINT('',#676);
#679=VERTEX_POINT('',#677);
#680=CARTESIAN_POINT('',(-3.15E1,0.E0,7.5E0));
#681=CARTESIAN_POINT('',(-3.35E1,0.E0,7.5E0));
#682=VERTEX_POINT('',#680);
#683=VERTEX_POINT('',#681);
#684=CARTESIAN_POINT('',(3.35E1,3.E-1,-7.5E0));
#685=CARTESIAN_POINT('',(3.15E1,3.E-1,-7.5E0));
#686=VERTEX_POINT('',#684);
#687=VERTEX_POINT('',#685);
#688=CARTESIAN_POINT('',(-3.15E1,3.E-1,7.5E0));
#689=CARTESIAN_POINT('',(-3.35E1,3.E-1,7.5E0));
#690=VERTEX_POINT('',#688);
#691=VERTEX_POINT('',#689);
#692=CARTESIAN_POINT('',(-3.155607528191E1,0.E0,-2.249301127630E0));
#693=CARTESIAN_POINT('',(-3.155607528191E1,0.E0,2.249301127630E0));
#694=VERTEX_POINT('',#692);
#695=VERTEX_POINT('',#693);
#696=CARTESIAN_POINT('',(-3.155607528191E1,3.E-1,2.249301127630E0));
#697=CARTESIAN_POINT('',(-3.155607528191E1,3.E-1,-2.249301127630E0));
#698=VERTEX_POINT('',#696);
#699=VERTEX_POINT('',#697);
#700=CARTESIAN_POINT('',(3.155607528191E1,3.E-1,-2.249301127630E0));
#701=CARTESIAN_POINT('',(3.155607528191E1,3.E-1,2.249301127630E0));
#702=VERTEX_POINT('',#700);
#703=VERTEX_POINT('',#701);
#704=CARTESIAN_POINT('',(3.155607528191E1,0.E0,2.249301127630E0));
#705=CARTESIAN_POINT('',(3.155607528191E1,0.E0,-2.249301127630E0));
#706=VERTEX_POINT('',#704);
#707=VERTEX_POINT('',#705);
#708=CARTESIAN_POINT('',(-2.143768445330E1,3.E-1,-2.5E0));
#709=CARTESIAN_POINT('',(-2.143768445330E1,0.E0,-2.5E0));
#710=VERTEX_POINT('',#708);
#711=VERTEX_POINT('',#709);
#712=CARTESIAN_POINT('',(-2.156229619087E1,0.E0,-2.498446950290E0));
#713=VERTEX_POINT('',#712);
#714=CARTESIAN_POINT('',(-2.156229619087E1,3.E-1,-2.498446950290E0));
#715=VERTEX_POINT('',#714);
#716=CARTESIAN_POINT('',(-2.156229619087E1,3.E-1,2.498446950290E0));
#717=CARTESIAN_POINT('',(-2.156229619087E1,0.E0,2.498446950290E0));
#718=VERTEX_POINT('',#716);
#719=VERTEX_POINT('',#717);
#720=CARTESIAN_POINT('',(-2.143768445330E1,0.E0,2.5E0));
#721=VERTEX_POINT('',#720);
#722=CARTESIAN_POINT('',(-2.143768445330E1,3.E-1,2.5E0));
#723=VERTEX_POINT('',#722);
#724=CARTESIAN_POINT('',(2.143768445330E1,3.E-1,2.5E0));
#725=CARTESIAN_POINT('',(2.143768445330E1,0.E0,2.5E0));
#726=VERTEX_POINT('',#724);
#727=VERTEX_POINT('',#725);
#728=CARTESIAN_POINT('',(2.156229619087E1,0.E0,2.498446950290E0));
#729=VERTEX_POINT('',#728);
#730=CARTESIAN_POINT('',(2.156229619087E1,3.E-1,2.498446950290E0));
#731=VERTEX_POINT('',#730);
#732=CARTESIAN_POINT('',(2.156229619087E1,3.E-1,-2.498446950290E0));
#733=CARTESIAN_POINT('',(2.156229619087E1,0.E0,-2.498446950290E0));
#734=VERTEX_POINT('',#732);
#735=VERTEX_POINT('',#733);
#736=CARTESIAN_POINT('',(2.143768445330E1,0.E0,-2.5E0));
#737=VERTEX_POINT('',#736);
#738=CARTESIAN_POINT('',(2.143768445330E1,3.E-1,-2.5E0));
#739=VERTEX_POINT('',#738);
#740=CARTESIAN_POINT('',(-3.75E1,0.E0,-7.5E0));
#741=CARTESIAN_POINT('',(-3.25E1,0.E0,-1.25E1));
#742=VERTEX_POINT('',#740);
#743=VERTEX_POINT('',#741);
#744=CARTESIAN_POINT('',(-3.25E1,3.E-1,-1.25E1));
#745=VERTEX_POINT('',#744);
#746=CARTESIAN_POINT('',(-3.75E1,3.E-1,-7.5E0));
#747=VERTEX_POINT('',#746);
#748=CARTESIAN_POINT('',(0.E0,0.E0,0.E0));
#749=DIRECTION('',(0.E0,1.E0,0.E0));
#750=DIRECTION('',(1.E0,0.E0,0.E0));
#751=AXIS2_PLACEMENT_3D('',#748,#749,#750);
#752=PLANE('',#751);
#754=ORIENTED_EDGE('',*,*,#753,.F.);
#756=ORIENTED_EDGE('',*,*,#755,.T.);
#758=ORIENTED_EDGE('',*,*,#757,.T.);
#760=ORIENTED_EDGE('',*,*,#759,.T.);
#762=ORIENTED_EDGE('',*,*,#761,.T.);
#763=EDGE_LOOP('',(#754,#756,#758,#760,#762));
#764=FACE_OUTER_BOUND('',#763,.F.);
#766=ORIENTED_EDGE('',*,*,#765,.F.);
#768=ORIENTED_EDGE('',*,*,#767,.F.);
#769=EDGE_LOOP('',(#766,#768));
#770=FACE_BOUND('',#769,.F.);
#772=ORIENTED_EDGE('',*,*,#771,.F.);
#774=ORIENTED_EDGE('',*,*,#773,.F.);
#775=EDGE_LOOP('',(#772,#774));
#776=FACE_BOUND('',#775,.F.);
#778=ORIENTED_EDGE('',*,*,#777,.F.);
#780=ORIENTED_EDGE('',*,*,#779,.F.);
#781=EDGE_LOOP('',(#778,#780));
#782=FACE_BOUND('',#781,.F.);
#784=ORIENTED_EDGE('',*,*,#783,.T.);
#786=ORIENTED_EDGE('',*,*,#785,.F.);
#788=ORIENTED_EDGE('',*,*,#787,.T.);
#790=ORIENTED_EDGE('',*,*,#789,.F.);
#792=ORIENTED_EDGE('',*,*,#791,.F.);
#794=ORIENTED_EDGE('',*,*,#793,.F.);
#796=ORIENTED_EDGE('',*,*,#795,.T.);
#798=ORIENTED_EDGE('',*,*,#797,.F.);
#800=ORIENTED_EDGE('',*,*,#799,.T.);
#802=ORIENTED_EDGE('',*,*,#801,.F.);
#804=ORIENTED_EDGE('',*,*,#803,.F.);
#806=ORIENTED_EDGE('',*,*,#805,.F.);
#807=EDGE_LOOP('',(#784,#786,#788,#790,#792,#794,#796,#798,#800,#802,#804,
#806));
#808=FACE_BOUND('',#807,.F.);
#810=ORIENTED_EDGE('',*,*,#809,.F.);
#812=ORIENTED_EDGE('',*,*,#811,.F.);
#813=EDGE_LOOP('',(#810,#812));
#814=FACE_BOUND('',#813,.F.);
#816=CARTESIAN_POINT('',(-2.15E1,0.E0,-7.5E0));
#817=DIRECTION('',(0.E0,1.E0,0.E0));
#818=DIRECTION('',(1.E0,0.E0,0.E0));
#819=AXIS2_PLACEMENT_3D('',#816,#817,#818);
#820=CYLINDRICAL_SURFACE('',#819,2.25E0);
#821=ORIENTED_EDGE('',*,*,#809,.T.);
#823=ORIENTED_EDGE('',*,*,#822,.T.);
#825=ORIENTED_EDGE('',*,*,#824,.F.);
#827=ORIENTED_EDGE('',*,*,#826,.F.);
#828=EDGE_LOOP('',(#821,#823,#825,#827));
#829=FACE_OUTER_BOUND('',#828,.F.);
#831=CARTESIAN_POINT('',(-2.15E1,0.E0,-7.5E0));
#832=DIRECTION('',(0.E0,1.E0,0.E0));
#833=DIRECTION('',(1.E0,0.E0,0.E0));
#834=AXIS2_PLACEMENT_3D('',#831,#832,#833);
#835=CYLINDRICAL_SURFACE('',#834,2.25E0);
#836=ORIENTED_EDGE('',*,*,#811,.T.);
#837=ORIENTED_EDGE('',*,*,#826,.T.);
#839=ORIENTED_EDGE('',*,*,#838,.F.);
#840=ORIENTED_EDGE('',*,*,#822,.F.);
#841=EDGE_LOOP('',(#836,#837,#839,#840));
#842=FACE_OUTER_BOUND('',#841,.F.);
#844=CARTESIAN_POINT('',(0.E0,3.E-1,0.E0));
#845=DIRECTION('',(0.E0,1.E0,0.E0));
#846=DIRECTION('',(1.E0,0.E0,0.E0));
#847=AXIS2_PLACEMENT_3D('',#844,#845,#846);
#848=PLANE('',#847);
#850=ORIENTED_EDGE('',*,*,#849,.F.);
#852=ORIENTED_EDGE('',*,*,#851,.F.);
#854=ORIENTED_EDGE('',*,*,#853,.F.);
#856=ORIENTED_EDGE('',*,*,#855,.F.);
#858=ORIENTED_EDGE('',*,*,#857,.F.);
#859=EDGE_LOOP('',(#850,#852,#854,#856,#858));
#860=FACE_OUTER_BOUND('',#859,.F.);
#862=ORIENTED_EDGE('',*,*,#861,.T.);
#864=ORIENTED_EDGE('',*,*,#863,.T.);
#865=EDGE_LOOP('',(#862,#864));
#866=FACE_BOUND('',#865,.F.);
#868=ORIENTED_EDGE('',*,*,#867,.T.);
#870=ORIENTED_EDGE('',*,*,#869,.T.);
#871=EDGE_LOOP('',(#868,#870));
#872=FACE_BOUND('',#871,.F.);
#874=ORIENTED_EDGE('',*,*,#873,.T.);
#876=ORIENTED_EDGE('',*,*,#875,.T.);
#877=EDGE_LOOP('',(#874,#876));
#878=FACE_BOUND('',#877,.F.);
#880=ORIENTED_EDGE('',*,*,#879,.T.);
#882=ORIENTED_EDGE('',*,*,#881,.T.);
#884=ORIENTED_EDGE('',*,*,#883,.F.);
#886=ORIENTED_EDGE('',*,*,#885,.T.);
#888=ORIENTED_EDGE('',*,*,#887,.T.);
#890=ORIENTED_EDGE('',*,*,#889,.T.);
#892=ORIENTED_EDGE('',*,*,#891,.T.);
#894=ORIENTED_EDGE('',*,*,#893,.T.);
#896=ORIENTED_EDGE('',*,*,#895,.F.);
#898=ORIENTED_EDGE('',*,*,#897,.T.);
#900=ORIENTED_EDGE('',*,*,#899,.T.);
#902=ORIENTED_EDGE('',*,*,#901,.T.);
#903=EDGE_LOOP('',(#880,#882,#884,#886,#888,#890,#892,#894,#896,#898,#900,
#902));
#904=FACE_BOUND('',#903,.F.);
#905=ORIENTED_EDGE('',*,*,#824,.T.);
#906=ORIENTED_EDGE('',*,*,#838,.T.);
#907=EDGE_LOOP('',(#905,#906));
#908=FACE_BOUND('',#907,.F.);
#910=CARTESIAN_POINT('',(2.15E1,0.E0,7.5E0));
#911=DIRECTION('',(0.E0,1.E0,0.E0));
#912=DIRECTION('',(1.E0,0.E0,0.E0));
#913=AXIS2_PLACEMENT_3D('',#910,#911,#912);
#914=CYLINDRICAL_SURFACE('',#913,2.25E0);
#915=ORIENTED_EDGE('',*,*,#765,.T.);
#917=ORIENTED_EDGE('',*,*,#916,.T.);
#918=ORIENTED_EDGE('',*,*,#861,.F.);
#920=ORIENTED_EDGE('',*,*,#919,.F.);
#921=EDGE_LOOP('',(#915,#917,#918,#920));
#922=FACE_OUTER_BOUND('',#921,.F.);
#924=CARTESIAN_POINT('',(2.15E1,0.E0,7.5E0));
#925=DIRECTION('',(0.E0,1.E0,0.E0));
#926=DIRECTION('',(1.E0,0.E0,0.E0));
#927=AXIS2_PLACEMENT_3D('',#924,#925,#926);
#928=CYLINDRICAL_SURFACE('',#927,2.25E0);
#929=ORIENTED_EDGE('',*,*,#767,.T.);
#930=ORIENTED_EDGE('',*,*,#919,.T.);
#931=ORIENTED_EDGE('',*,*,#863,.F.);
#932=ORIENTED_EDGE('',*,*,#916,.F.);
#933=EDGE_LOOP('',(#929,#930,#931,#932));
#934=FACE_OUTER_BOUND('',#933,.F.);
#936=CARTESIAN_POINT('',(3.25E1,0.E0,-7.5E0));
#937=DIRECTION('',(0.E0,1.E0,0.E0));
#938=DIRECTION('',(1.E0,0.E0,0.E0));
#939=AXIS2_PLACEMENT_3D('',#936,#937,#938);
#940=CYLINDRICAL_SURFACE('',#939,1.E0);
#941=ORIENTED_EDGE('',*,*,#771,.T.);
#943=ORIENTED_EDGE('',*,*,#942,.T.);
#944=ORIENTED_EDGE('',*,*,#867,.F.);
#946=ORIENTED_EDGE('',*,*,#945,.F.);
#947=EDGE_LOOP('',(#941,#943,#944,#946));
#948=FACE_OUTER_BOUND('',#947,.F.);
#950=CARTESIAN_POINT('',(3.25E1,0.E0,-7.5E0));
#951=DIRECTION('',(0.E0,1.E0,0.E0));
#952=DIRECTION('',(1.E0,0.E0,0.E0));
#953=AXIS2_PLACEMENT_3D('',#950,#951,#952);
#954=CYLINDRICAL_SURFACE('',#953,1.E0);
#955=ORIENTED_EDGE('',*,*,#773,.T.);
#956=ORIENTED_EDGE('',*,*,#945,.T.);
#957=ORIENTED_EDGE('',*,*,#869,.F.);
#958=ORIENTED_EDGE('',*,*,#942,.F.);
#959=EDGE_LOOP('',(#955,#956,#957,#958));
#960=FACE_OUTER_BOUND('',#959,.F.);
#962=CARTESIAN_POINT('',(-3.25E1,0.E0,7.5E0));
#963=DIRECTION('',(0.E0,1.E0,0.E0));
#964=DIRECTION('',(1.E0,0.E0,0.E0));
#965=AXIS2_PLACEMENT_3D('',#962,#963,#964);
#966=CYLINDRICAL_SURFACE('',#965,1.E0);
#967=ORIENTED_EDGE('',*,*,#777,.T.);
#969=ORIENTED_EDGE('',*,*,#968,.T.);
#970=ORIENTED_EDGE('',*,*,#873,.F.);
#972=ORIENTED_EDGE('',*,*,#971,.F.);
#973=EDGE_LOOP('',(#967,#969,#970,#972));
#974=FACE_OUTER_BOUND('',#973,.F.);
#976=CARTESIAN_POINT('',(-3.25E1,0.E0,7.5E0));
#977=DIRECTION('',(0.E0,1.E0,0.E0));
#978=DIRECTION('',(1.E0,0.E0,0.E0));
#979=AXIS2_PLACEMENT_3D('',#976,#977,#978);
#980=CYLINDRICAL_SURFACE('',#979,1.E0);
#981=ORIENTED_EDGE('',*,*,#779,.T.);
#982=ORIENTED_EDGE('',*,*,#971,.T.);
#983=ORIENTED_EDGE('',*,*,#875,.F.);
#984=ORIENTED_EDGE('',*,*,#968,.F.);
#985=EDGE_LOOP('',(#981,#982,#983,#984));
#986=FACE_OUTER_BOUND('',#985,.F.);
#988=CARTESIAN_POINT('',(-2.143768445330E1,6.34236E0,2.5E0));
#989=DIRECTION('',(0.E0,-1.E0,0.E0));
#990=DIRECTION('',(-2.492234751448E-2,0.E0,-9.996893900579E-1));
#991=AXIS2_PLACEMENT_3D('',#988,#989,#990);
#992=CYLINDRICAL_SURFACE('',#991,5.E0);
#994=ORIENTED_EDGE('',*,*,#993,.T.);
#995=ORIENTED_EDGE('',*,*,#783,.F.);
#997=ORIENTED_EDGE('',*,*,#996,.F.);
#998=ORIENTED_EDGE('',*,*,#879,.F.);
#999=EDGE_LOOP('',(#994,#995,#997,#998));
#1000=FACE_OUTER_BOUND('',#999,.F.);
#1002=CARTESIAN_POINT('',(2.15E1,0.E0,-2.5E0));
#1003=DIRECTION('',(0.E0,0.E0,-1.E0));
#1004=DIRECTION('',(-1.E0,0.E0,0.E0));
#1005=AXIS2_PLACEMENT_3D('',#1002,#1003,#1004);
#1006=PLANE('',#1005);
#1007=ORIENTED_EDGE('',*,*,#993,.F.);
#1008=ORIENTED_EDGE('',*,*,#901,.F.);
#1010=ORIENTED_EDGE('',*,*,#1009,.T.);
#1011=ORIENTED_EDGE('',*,*,#785,.T.);
#1012=EDGE_LOOP('',(#1007,#1008,#1010,#1011));
#1013=FACE_OUTER_BOUND('',#1012,.F.);
#1015=CARTESIAN_POINT('',(2.143768445330E1,6.34236E0,2.5E0));
#1016=DIRECTION('',(0.E0,-1.E0,0.E0));
#1017=DIRECTION('',(0.E0,0.E0,-1.E0));
#1018=AXIS2_PLACEMENT_3D('',#1015,#1016,#1017);
#1019=CYLINDRICAL_SURFACE('',#1018,5.E0);
#1021=ORIENTED_EDGE('',*,*,#1020,.T.);
#1022=ORIENTED_EDGE('',*,*,#787,.F.);
#1023=ORIENTED_EDGE('',*,*,#1009,.F.);
#1024=ORIENTED_EDGE('',*,*,#899,.F.);
#1025=EDGE_LOOP('',(#1021,#1022,#1023,#1024));
#1026=FACE_OUTER_BOUND('',#1025,.F.);
#1028=CARTESIAN_POINT('',(3.155607528191E1,0.E0,-2.249301127630E0));
#1029=DIRECTION('',(2.492234751448E-2,0.E0,-9.996893900579E-1));
#1030=DIRECTION('',(-9.996893900579E-1,0.E0,-2.492234751448E-2));
#1031=AXIS2_PLACEMENT_3D('',#1028,#1029,#1030);
#1032=PLANE('',#1031);
#1033=ORIENTED_EDGE('',*,*,#1020,.F.);
#1034=ORIENTED_EDGE('',*,*,#897,.F.);
#1036=ORIENTED_EDGE('',*,*,#1035,.F.);
#1037=ORIENTED_EDGE('',*,*,#789,.T.);
#1038=EDGE_LOOP('',(#1033,#1034,#1036,#1037));
#1039=FACE_OUTER_BOUND('',#1038,.F.);
#1041=CARTESIAN_POINT('',(3.15E1,0.E0,0.E0));
#1042=DIRECTION('',(0.E0,1.E0,0.E0));
#1043=DIRECTION('',(1.E0,0.E0,0.E0));
#1044=AXIS2_PLACEMENT_3D('',#1041,#1042,#1043);
#1045=CYLINDRICAL_SURFACE('',#1044,2.25E0);
#1046=ORIENTED_EDGE('',*,*,#895,.T.);
#1048=ORIENTED_EDGE('',*,*,#1047,.F.);
#1049=ORIENTED_EDGE('',*,*,#791,.T.);
#1050=ORIENTED_EDGE('',*,*,#1035,.T.);
#1051=EDGE_LOOP('',(#1046,#1048,#1049,#1050));
#1052=FACE_OUTER_BOUND('',#1051,.F.);
#1054=CARTESIAN_POINT('',(2.15E1,0.E0,2.5E0));
#1055=DIRECTION('',(2.492234751448E-2,0.E0,9.996893900579E-1));
#1056=DIRECTION('',(9.996893900579E-1,0.E0,-2.492234751448E-2));
#1057=AXIS2_PLACEMENT_3D('',#1054,#1055,#1056);
#1058=PLANE('',#1057);
#1060=ORIENTED_EDGE('',*,*,#1059,.T.);
#1061=ORIENTED_EDGE('',*,*,#793,.T.);
#1062=ORIENTED_EDGE('',*,*,#1047,.T.);
#1063=ORIENTED_EDGE('',*,*,#893,.F.);
#1064=EDGE_LOOP('',(#1060,#1061,#1062,#1063));
#1065=FACE_OUTER_BOUND('',#1064,.F.);
#1067=CARTESIAN_POINT('',(2.143768445330E1,6.34236E0,-2.5E0));
#1068=DIRECTION('',(0.E0,-1.E0,0.E0));
#1069=DIRECTION('',(2.492234751448E-2,0.E0,9.996893900579E-1));
#1070=AXIS2_PLACEMENT_3D('',#1067,#1068,#1069);
#1071=CYLINDRICAL_SURFACE('',#1070,5.E0);
#1073=ORIENTED_EDGE('',*,*,#1072,.T.);
#1074=ORIENTED_EDGE('',*,*,#795,.F.);
#1075=ORIENTED_EDGE('',*,*,#1059,.F.);
#1076=ORIENTED_EDGE('',*,*,#891,.F.);
#1077=EDGE_LOOP('',(#1073,#1074,#1075,#1076));
#1078=FACE_OUTER_BOUND('',#1077,.F.);
#1080=CARTESIAN_POINT('',(-2.15E1,0.E0,2.5E0));
#1081=DIRECTION('',(0.E0,0.E0,1.E0));
#1082=DIRECTION('',(1.E0,0.E0,0.E0));
#1083=AXIS2_PLACEMENT_3D('',#1080,#1081,#1082);
#1084=PLANE('',#1083);
#1086=ORIENTED_EDGE('',*,*,#1085,.T.);
#1087=ORIENTED_EDGE('',*,*,#797,.T.);
#1088=ORIENTED_EDGE('',*,*,#1072,.F.);
#1089=ORIENTED_EDGE('',*,*,#889,.F.);
#1090=EDGE_LOOP('',(#1086,#1087,#1088,#1089));
#1091=FACE_OUTER_BOUND('',#1090,.F.);
#1093=CARTESIAN_POINT('',(-2.143768445330E1,6.34236E0,-2.5E0));
#1094=DIRECTION('',(0.E0,-1.E0,0.E0));
#1095=DIRECTION('',(0.E0,0.E0,1.E0));
#1096=AXIS2_PLACEMENT_3D('',#1093,#1094,#1095);
#1097=CYLINDRICAL_SURFACE('',#1096,5.E0);
#1099=ORIENTED_EDGE('',*,*,#1098,.T.);
#1100=ORIENTED_EDGE('',*,*,#799,.F.);
#1101=ORIENTED_EDGE('',*,*,#1085,.F.);
#1102=ORIENTED_EDGE('',*,*,#887,.F.);
#1103=EDGE_LOOP('',(#1099,#1100,#1101,#1102));
#1104=FACE_OUTER_BOUND('',#1103,.F.);
#1106=CARTESIAN_POINT('',(-3.155607528191E1,0.E0,2.249301127630E0));
#1107=DIRECTION('',(-2.492234751448E-2,0.E0,9.996893900579E-1));
#1108=DIRECTION('',(9.996893900579E-1,0.E0,2.492234751448E-2));
#1109=AXIS2_PLACEMENT_3D('',#1106,#1107,#1108);
#1110=PLANE('',#1109);
#1111=ORIENTED_EDGE('',*,*,#1098,.F.);
#1112=ORIENTED_EDGE('',*,*,#885,.F.);
#1114=ORIENTED_EDGE('',*,*,#1113,.F.);
#1115=ORIENTED_EDGE('',*,*,#801,.T.);
#1116=EDGE_LOOP('',(#1111,#1112,#1114,#1115));
#1117=FACE_OUTER_BOUND('',#1116,.F.);
#1119=CARTESIAN_POINT('',(-3.15E1,0.E0,0.E0));
#1120=DIRECTION('',(0.E0,1.E0,0.E0));
#1121=DIRECTION('',(1.E0,0.E0,0.E0));
#1122=AXIS2_PLACEMENT_3D('',#1119,#1120,#1121);
#1123=CYLINDRICAL_SURFACE('',#1122,2.25E0);
#1124=ORIENTED_EDGE('',*,*,#803,.T.);
#1125=ORIENTED_EDGE('',*,*,#1113,.T.);
#1126=ORIENTED_EDGE('',*,*,#883,.T.);
#1128=ORIENTED_EDGE('',*,*,#1127,.F.);
#1129=EDGE_LOOP('',(#1124,#1125,#1126,#1128));
#1130=FACE_OUTER_BOUND('',#1129,.F.);
#1132=CARTESIAN_POINT('',(-2.15E1,0.E0,-2.5E0));
#1133=DIRECTION('',(-2.492234751448E-2,0.E0,-9.996893900579E-1));
#1134=DIRECTION('',(-9.996893900579E-1,0.E0,2.492234751448E-2));
#1135=AXIS2_PLACEMENT_3D('',#1132,#1133,#1134);
#1136=PLANE('',#1135);
#1137=ORIENTED_EDGE('',*,*,#996,.T.);
#1138=ORIENTED_EDGE('',*,*,#805,.T.);
#1139=ORIENTED_EDGE('',*,*,#1127,.T.);
#1140=ORIENTED_EDGE('',*,*,#881,.F.);
#1141=EDGE_LOOP('',(#1137,#1138,#1139,#1140));
#1142=FACE_OUTER_BOUND('',#1141,.F.);
#1144=CARTESIAN_POINT('',(-3.5E1,1.5E-1,-1.E1));
#1145=DIRECTION('',(-7.071067811865E-1,0.E0,-7.071067811865E-1));
#1146=DIRECTION('',(7.071067811865E-1,0.E0,-7.071067811865E-1));
#1147=AXIS2_PLACEMENT_3D('',#1144,#1145,#1146);
#1148=PLANE('',#1147);
#1149=ORIENTED_EDGE('',*,*,#753,.T.);
#1151=ORIENTED_EDGE('',*,*,#1150,.F.);
#1152=ORIENTED_EDGE('',*,*,#849,.T.);
#1154=ORIENTED_EDGE('',*,*,#1153,.T.);
#1155=EDGE_LOOP('',(#1149,#1151,#1152,#1154));
#1156=FACE_OUTER_BOUND('',#1155,.F.);
#1158=CARTESIAN_POINT('',(3.75E1,0.E0,-1.25E1));
#1159=DIRECTION('',(0.E0,0.E0,-1.E0));
#1160=DIRECTION('',(-1.E0,0.E0,0.E0));
#1161=AXIS2_PLACEMENT_3D('',#1158,#1159,#1160);
#1162=PLANE('',#1161);
#1163=ORIENTED_EDGE('',*,*,#1150,.T.);
#1164=ORIENTED_EDGE('',*,*,#761,.F.);
#1166=ORIENTED_EDGE('',*,*,#1165,.T.);
#1167=ORIENTED_EDGE('',*,*,#851,.T.);
#1168=EDGE_LOOP('',(#1163,#1164,#1166,#1167));
#1169=FACE_OUTER_BOUND('',#1168,.F.);
#1171=CARTESIAN_POINT('',(3.75E1,0.E0,1.25E1));
#1172=DIRECTION('',(1.E0,0.E0,0.E0));
#1173=DIRECTION('',(0.E0,0.E0,-1.E0));
#1174=AXIS2_PLACEMENT_3D('',#1171,#1172,#1173);
#1175=PLANE('',#1174);
#1176=ORIENTED_EDGE('',*,*,#759,.F.);
#1178=ORIENTED_EDGE('',*,*,#1177,.T.);
#1179=ORIENTED_EDGE('',*,*,#853,.T.);
#1180=ORIENTED_EDGE('',*,*,#1165,.F.);
#1181=EDGE_LOOP('',(#1176,#1178,#1179,#1180));
#1182=FACE_OUTER_BOUND('',#1181,.F.);
#1184=CARTESIAN_POINT('',(-3.75E1,0.E0,1.25E1));
#1185=DIRECTION('',(0.E0,0.E0,1.E0));
#1186=DIRECTION('',(1.E0,0.E0,0.E0));
#1187=AXIS2_PLACEMENT_3D('',#1184,#1185,#1186);
#1188=PLANE('',#1187);
#1189=ORIENTED_EDGE('',*,*,#757,.F.);
#1191=ORIENTED_EDGE('',*,*,#1190,.T.);
#1192=ORIENTED_EDGE('',*,*,#855,.T.);
#1193=ORIENTED_EDGE('',*,*,#1177,.F.);
#1194=EDGE_LOOP('',(#1189,#1191,#1192,#1193));
#1195=FACE_OUTER_BOUND('',#1194,.F.);
#1197=CARTESIAN_POINT('',(-3.75E1,0.E0,-1.25E1));
#1198=DIRECTION('',(-1.E0,0.E0,0.E0));
#1199=DIRECTION('',(0.E0,0.E0,1.E0));
#1200=AXIS2_PLACEMENT_3D('',#1197,#1198,#1199);
#1201=PLANE('',#1200);
#1202=ORIENTED_EDGE('',*,*,#1153,.F.);
#1203=ORIENTED_EDGE('',*,*,#857,.T.);
#1204=ORIENTED_EDGE('',*,*,#1190,.F.);
#1205=ORIENTED_EDGE('',*,*,#755,.F.);
#1206=EDGE_LOOP('',(#1202,#1203,#1204,#1205));
#1207=FACE_OUTER_BOUND('',#1206,.F.);
#1209=CLOSED_SHELL('',(#815,#830,#843,#909,#923,#935,#949,#961,#975,#987,#1001,
#1014,#1027,#1040,#1053,#1066,#1079,#1092,#1105,#1118,#1131,#1143,#1157,#1170,
#1183,#1196,#1208));
#1210=MANIFOLD_SOLID_BREP('',#1209);
#1211=FILL_AREA_STYLE_COLOUR('',#67);
#1212=FILL_AREA_STYLE('',(#1211));
#1213=SURFACE_STYLE_FILL_AREA(#1212);
#1214=SURFACE_SIDE_STYLE('',(#1213));
#1215=SURFACE_STYLE_USAGE(.BOTH.,#1214);
#1216=PRESENTATION_STYLE_ASSIGNMENT((#1215));
#93=STYLED_ITEM('',(#1216),#1210);
#1217=PRESENTATION_LAYER_ASSIGNMENT('SOLIDE','',(#93));
#1220=PLANE_ANGLE_MEASURE_WITH_UNIT(PLANE_ANGLE_MEASURE(1.745329251994E-2),
#1219);
#1221=(CONVERSION_BASED_UNIT('DEGREE',#1220)NAMED_UNIT(*)PLANE_ANGLE_UNIT());
#1223=UNCERTAINTY_MEASURE_WITH_UNIT(LENGTH_MEASURE(7.905434841171E-3),#1218,
'distance_accuracy_value',
'Maximum model space distance between geometric entities at asserted connectivities');
#1226=MECHANICAL_DESIGN_GEOMETRIC_PRESENTATION_REPRESENTATION('',(#102,#110,
#118,#126,#134,#142,#150,#158,#166,#173,#181,#188,#195,#203,#210,#218,#225,#232,
#239,#246,#253,#260,#267,#274,#281,#289,#297,#305,#313,#321,#329,#337,#345,#353,
#360,#367,#375,#382,#390,#397,#404,#412,#419,#426,#433,#440,#447,#454,#461,#468,
#475,#482,#489,#496,#503,#510,#517,#525,#532,#540,#547,#554,#561,#568,#575,#583,
#590,#598,#605,#612,#619,#626,#633,#640,#647,#93),#1224);
#1227=APPLICATION_CONTEXT('automotive_design');
#1228=APPLICATION_PROTOCOL_DEFINITION('international standard',
'automotive_design',2001,#1227);
#1229=PRODUCT_DEFINITION_CONTEXT('part definition',#1227,'design');
#1230=PRODUCT_CONTEXT('',#1227,'mechanical');
#1231=PRODUCT('BCBBBV6_CHAMBRE_SUPERIEURE','BCBBBV6_CHAMBRE_SUPERIEURE',
'NOT SPECIFIED',(#1230));
#1232=PRODUCT_DEFINITION_FORMATION('9','LAST_VERSION',#1231);
#1240=DERIVED_UNIT_ELEMENT(#1239,2.E0);
#1241=DERIVED_UNIT((#1240));
#1242=MEASURE_REPRESENTATION_ITEM('surface area measure',AREA_MEASURE(
3.110398229990E3),#1241);
#1247=DERIVED_UNIT_ELEMENT(#1246,3.E0);
#1248=DERIVED_UNIT((#1247));
#1249=MEASURE_REPRESENTATION_ITEM('volume measure',VOLUME_MEASURE(
4.495469714211E2),#1248);
#1253=CARTESIAN_POINT('centre point',(2.989120348764E-1,1.5E-1,
9.036875473007E-2));
#1258=DERIVED_UNIT_ELEMENT(#1257,2.E0);
#1259=DERIVED_UNIT((#1258));
#1260=MEASURE_REPRESENTATION_ITEM('surface area measure',AREA_MEASURE(
3.110398229990E3),#1259);
#1265=DERIVED_UNIT_ELEMENT(#1264,3.E0);
#1266=DERIVED_UNIT((#1265));
#1267=MEASURE_REPRESENTATION_ITEM('volume measure',VOLUME_MEASURE(
4.495469714211E2),#1266);
#1271=CARTESIAN_POINT('centre point',(2.989120348764E-1,1.5E-1,
9.036875473007E-2));
#1276=PRODUCT_RELATED_PRODUCT_CATEGORY('part','',(#1231));
#1278=GENERAL_PROPERTY('','PTC_COMMON_NAME','user defined attribute');
#1279=GENERAL_PROPERTY_ASSOCIATION('user defined attribute','',#1278,#1277);
#1280=DESCRIPTIVE_REPRESENTATION_ITEM('PTC_COMMON_NAME',
'bcbbbv6_chambre_superieure.prt');
#1284=GENERAL_PROPERTY('','MATIERE','user defined attribute');
#1285=GENERAL_PROPERTY_ASSOCIATION('user defined attribute','',#1284,#1283);
#1286=DESCRIPTIVE_REPRESENTATION_ITEM('MATIERE','ACIER_A60');
#1290=GENERAL_PROPERTY('','FOURNISSEUR','user defined attribute');
#1291=GENERAL_PROPERTY_ASSOCIATION('user defined attribute','',#1290,#1289);
#1292=DESCRIPTIVE_REPRESENTATION_ITEM('FOURNISSEUR','hepia');
#1296=GENERAL_PROPERTY('','PRIX','user defined attribute');
#1297=GENERAL_PROPERTY_ASSOCIATION('user defined attribute','',#1296,#1295);
#1298=VALUE_REPRESENTATION_ITEM('PRIX',NUMERIC_MEASURE(0.E0));
#1301=DESCRIPTIVE_REPRESENTATION_ITEM('attribute description','Real Number');
#1306=GENERAL_PROPERTY('','MASSE','user defined attribute');
#1307=GENERAL_PROPERTY_ASSOCIATION('user defined attribute','',#1306,#1305);
#1308=VALUE_REPRESENTATION_ITEM('MASSE',NUMERIC_MEASURE(7.87E-3));
#1311=DESCRIPTIVE_REPRESENTATION_ITEM('attribute description','Real Number');
#1316=GENERAL_PROPERTY('','MASSE_KG','user defined attribute');
#1317=GENERAL_PROPERTY_ASSOCIATION('user defined attribute','',#1316,#1315);
#1318=VALUE_REPRESENTATION_ITEM('MASSE_KG',NUMERIC_MEASURE(0.E0));
#1321=DESCRIPTIVE_REPRESENTATION_ITEM('attribute description','Real Number');
#1326=GENERAL_PROPERTY('','PTC_MATERIAL_NAME','user defined attribute');
#1327=GENERAL_PROPERTY_ASSOCIATION('user defined attribute','',#1326,#1325);
#1328=DESCRIPTIVE_REPRESENTATION_ITEM('PTC_MATERIAL_NAME','ACIER_A60');
#1332=GENERAL_PROPERTY('','CONCEPTEUR','user defined attribute');
#1333=GENERAL_PROPERTY_ASSOCIATION('user defined attribute','',#1332,#1331);
#1334=DESCRIPTIVE_REPRESENTATION_ITEM('CONCEPTEUR','');
#1338=GENERAL_PROPERTY('','DESSIN','user defined attribute');
#1339=GENERAL_PROPERTY_ASSOCIATION('user defined attribute','',#1338,#1337);
#1340=DESCRIPTIVE_REPRESENTATION_ITEM('DESSIN','gm2-g1-00.00');
#1344=GENERAL_PROPERTY('','MFG_WP_MATERIAL','user defined attribute');
#1345=GENERAL_PROPERTY_ASSOCIATION('user defined attribute','',#1344,#1343);
#1346=DESCRIPTIVE_REPRESENTATION_ITEM('MFG_WP_MATERIAL','ACIER_A60');
#1=COLOUR_RGB('',0.E0,0.E0,4.7E-1);
#2=COLOUR_RGB('',0.E0,0.E0,6.E-1);
#3=COLOUR_RGB('',0.E0,0.E0,8.E-1);
#4=DRAUGHTING_PRE_DEFINED_COLOUR('blue');
#5=COLOUR_RGB('',0.E0,2.E-1,1.E0);
#6=COLOUR_RGB('',0.E0,4.E-1,0.E0);
#7=COLOUR_RGB('',0.E0,4.E-1,4.E-1);
#8=COLOUR_RGB('',0.E0,4.E-1,1.E0);
#9=COLOUR_RGB('',0.E0,5.3E-1,5.3E-1);
#10=COLOUR_RGB('',0.E0,6.E-1,0.E0);
#11=COLOUR_RGB('',0.E0,6.E-1,1.E0);
#12=COLOUR_RGB('',0.E0,8.E-1,0.E0);
#13=COLOUR_RGB('',0.E0,8.E-1,8.E-1);
#14=COLOUR_RGB('',0.E0,8.E-1,1.E0);
#15=DRAUGHTING_PRE_DEFINED_COLOUR('green');
#16=COLOUR_RGB('',0.E0,1.E0,2.E-1);
#17=COLOUR_RGB('',0.E0,1.E0,4.E-1);
#18=COLOUR_RGB('',0.E0,1.E0,6.E-1);
#19=COLOUR_RGB('',0.E0,1.E0,8.E-1);
#20=DRAUGHTING_PRE_DEFINED_COLOUR('cyan');
#21=COLOUR_RGB('',2.E-1,1.E0,0.E0);
#22=COLOUR_RGB('',2.E-1,1.E0,2.E-1);
#23=COLOUR_RGB('',2.E-1,1.E0,1.E0);
#24=COLOUR_RGB('',2.7E-1,0.E0,4.E-1);
#25=COLOUR_RGB('',2.7E-1,2.7E-1,0.E0);
#26=COLOUR_RGB('',2.7E-1,2.7E-1,1.E0);
#27=COLOUR_RGB('',3.3E-1,0.E0,0.E0);
#28=COLOUR_RGB('',3.3E-1,0.E0,5.3E-1);
#29=COLOUR_RGB('',4.E-1,0.E0,4.E-1);
#30=COLOUR_RGB('',4.E-1,0.E0,6.7E-1);
#31=COLOUR_RGB('',4.E-1,1.3E-1,0.E0);
#32=COLOUR_RGB('',4.E-1,4.E-1,0.E0);
#33=COLOUR_RGB('',4.E-1,4.E-1,1.E0);
#34=COLOUR_RGB('',4.E-1,1.E0,0.E0);
#35=COLOUR_RGB('',4.E-1,1.E0,4.E-1);
#36=COLOUR_RGB('',4.E-1,1.E0,1.E0);
#37=COLOUR_RGB('',4.7E-1,0.E0,0.E0);
#38=COLOUR_RGB('',4.7E-1,0.E0,8.7E-1);
#39=COLOUR_RGB('',4.7E-1,2.E-1,7.E-2);
#40=COLOUR_RGB('',4.7E-1,4.7E-1,4.7E-1);
#41=COLOUR_RGB('',5.3E-1,2.7E-1,1.3E-1);
#42=COLOUR_RGB('',6.E-1,2.E-1,1.E0);
#43=COLOUR_RGB('',6.E-1,3.3E-1,2.E-1);
#44=COLOUR_RGB('',6.E-1,6.E-1,0.E0);
#45=COLOUR_RGB('',6.E-1,6.E-1,1.E0);
#46=COLOUR_RGB('',6.E-1,1.E0,6.E-1);
#47=COLOUR_RGB('',6.E-1,1.E0,1.E0);
#48=COLOUR_RGB('',6.35294E-1,6.86275E-1,7.4902E-1);
#49=COLOUR_RGB('',6.7E-1,0.E0,0.E0);
#50=COLOUR_RGB('',6.7E-1,0.E0,5.3E-1);
#51=COLOUR_RGB('',6.7E-1,4.E-1,2.7E-1);
#52=COLOUR_RGB('',6.7E-1,4.E-1,1.E0);
#53=COLOUR_RGB('',6.7E-1,1.E0,0.E0);
#54=COLOUR_RGB('',7.3E-1,2.7E-1,1.E0);
#55=COLOUR_RGB('',7.3E-1,4.E-1,0.E0);
#56=COLOUR_RGB('',7.3E-1,4.7E-1,3.3E-1);
#57=COLOUR_RGB('',7.3E-1,7.3E-1,7.3E-1);
#58=COLOUR_RGB('',8.E-1,0.E0,8.E-1);
#59=COLOUR_RGB('',8.E-1,5.3E-1,4.E-1);
#60=COLOUR_RGB('',8.E-1,6.E-1,1.E0);
#61=COLOUR_RGB('',8.E-1,8.E-1,0.E0);
#62=COLOUR_RGB('',8.E-1,8.E-1,1.E0);
#63=COLOUR_RGB('',8.E-1,1.E0,8.E-1);
#64=COLOUR_RGB('',8.E-1,1.E0,1.E0);
#65=COLOUR_RGB('',8.7E-1,0.E0,0.E0);
#66=COLOUR_RGB('',8.7E-1,6.E-1,4.7E-1);
#67=COLOUR_RGB('',8.784E-1,9.49E-1,1.E0);
#68=COLOUR_RGB('',9.3E-1,1.E0,1.E0);
#69=DRAUGHTING_PRE_DEFINED_COLOUR('red');
#70=COLOUR_RGB('',1.E0,0.E0,2.7E-1);
#71=COLOUR_RGB('',1.E0,0.E0,4.7E-1);
#72=DRAUGHTING_PRE_DEFINED_COLOUR('magenta');
#73=COLOUR_RGB('',1.E0,2.E-1,1.E0);
#74=COLOUR_RGB('',1.E0,2.7E-1,0.E0);
#75=COLOUR_RGB('',1.E0,2.7E-1,2.7E-1);
#76=COLOUR_RGB('',1.E0,4.E-1,1.E0);
#77=COLOUR_RGB('',1.E0,4.7E-1,0.E0);
#78=COLOUR_RGB('',1.E0,4.7E-1,5.3E-1);
#79=COLOUR_RGB('',1.E0,6.E-1,1.E0);
#80=COLOUR_RGB('',1.E0,6.7E-1,0.E0);
#81=COLOUR_RGB('',1.E0,6.7E-1,6.7E-1);
#82=COLOUR_RGB('',1.E0,7.3E-1,5.3E-1);
#83=COLOUR_RGB('',1.E0,8.E-1,8.E-1);
#84=COLOUR_RGB('',1.E0,8.E-1,1.E0);
#85=COLOUR_RGB('',1.E0,8.7E-1,0.E0);
#86=COLOUR_RGB('',1.E0,9.3E-1,9.3E-1);
#87=DRAUGHTING_PRE_DEFINED_COLOUR('yellow');
#88=COLOUR_RGB('',1.E0,1.E0,1.3E-1);
#89=COLOUR_RGB('',1.E0,1.E0,3.3E-1);
#90=COLOUR_RGB('',1.E0,1.E0,5.3E-1);
#91=COLOUR_RGB('',1.E0,1.E0,7.3E-1);
#92=DRAUGHTING_PRE_DEFINED_COLOUR('white');
#98=CIRCLE('',#97,2.25E0);
#107=CIRCLE('',#106,2.25E0);
#115=CIRCLE('',#114,2.25E0);
#123=CIRCLE('',#122,2.25E0);
#131=CIRCLE('',#130,1.E0);
#139=CIRCLE('',#138,1.E0);
#147=CIRCLE('',#146,1.E0);
#155=CIRCLE('',#154,1.E0);
#163=CIRCLE('',#162,5.E0);
#178=CIRCLE('',#177,5.E0);
#200=CIRCLE('',#199,5.E0);
#215=CIRCLE('',#214,5.E0);
#286=CIRCLE('',#285,2.25E0);
#294=CIRCLE('',#293,2.25E0);
#302=CIRCLE('',#301,2.25E0);
#310=CIRCLE('',#309,2.25E0);
#318=CIRCLE('',#317,1.E0);
#326=CIRCLE('',#325,1.E0);
#334=CIRCLE('',#333,1.E0);
#342=CIRCLE('',#341,1.E0);
#350=CIRCLE('',#349,5.E0);
#372=CIRCLE('',#371,5.E0);
#387=CIRCLE('',#386,5.E0);
#409=CIRCLE('',#408,5.E0);
#522=CIRCLE('',#521,2.25E0);
#537=CIRCLE('',#536,2.25E0);
#580=CIRCLE('',#579,2.25E0);
#595=CIRCLE('',#594,2.25E0);
#753=EDGE_CURVE('',#742,#743,#236,.T.);
#755=EDGE_CURVE('',#742,#650,#243,.T.);
#757=EDGE_CURVE('',#650,#651,#250,.T.);
#759=EDGE_CURVE('',#651,#653,#257,.T.);
#761=EDGE_CURVE('',#653,#743,#264,.T.);
#765=EDGE_CURVE('',#666,#667,#115,.T.);
#767=EDGE_CURVE('',#667,#666,#123,.T.);
#771=EDGE_CURVE('',#678,#679,#131,.T.);
#773=EDGE_CURVE('',#679,#678,#139,.T.);
#777=EDGE_CURVE('',#682,#683,#147,.T.);
#779=EDGE_CURVE('',#683,#682,#155,.T.);
#783=EDGE_CURVE('',#713,#711,#163,.T.);
#785=EDGE_CURVE('',#737,#711,#170,.T.);
#787=EDGE_CURVE('',#737,#735,#178,.T.);
#789=EDGE_CURVE('',#707,#735,#185,.T.);
#791=EDGE_CURVE('',#706,#707,#537,.T.);
#793=EDGE_CURVE('',#729,#706,#192,.T.);
#795=EDGE_CURVE('',#729,#727,#200,.T.);
#797=EDGE_CURVE('',#721,#727,#207,.T.);
#799=EDGE_CURVE('',#721,#719,#215,.T.);
#801=EDGE_CURVE('',#695,#719,#222,.T.);
#803=EDGE_CURVE('',#694,#695,#580,.T.);
#805=EDGE_CURVE('',#713,#694,#229,.T.);
#809=EDGE_CURVE('',#662,#663,#98,.T.);
#811=EDGE_CURVE('',#663,#662,#107,.T.);
#815=ADVANCED_FACE('',(#764,#770,#776,#782,#808,#814),#752,.F.);
#822=EDGE_CURVE('',#663,#671,#278,.T.);
#824=EDGE_CURVE('',#670,#671,#286,.T.);
#826=EDGE_CURVE('',#662,#670,#271,.T.);
#830=ADVANCED_FACE('',(#829),#820,.F.);
#838=EDGE_CURVE('',#671,#670,#294,.T.);
#843=ADVANCED_FACE('',(#842),#835,.F.);
#849=EDGE_CURVE('',#745,#747,#423,.T.);
#851=EDGE_CURVE('',#659,#745,#430,.T.);
#853=EDGE_CURVE('',#657,#659,#437,.T.);
#855=EDGE_CURVE('',#656,#657,#444,.T.);
#857=EDGE_CURVE('',#747,#656,#451,.T.);
#861=EDGE_CURVE('',#674,#675,#302,.T.);
#863=EDGE_CURVE('',#675,#674,#310,.T.);
#867=EDGE_CURVE('',#686,#687,#318,.T.);
#869=EDGE_CURVE('',#687,#686,#326,.T.);
#873=EDGE_CURVE('',#690,#691,#334,.T.);
#875=EDGE_CURVE('',#691,#690,#342,.T.);
#879=EDGE_CURVE('',#710,#715,#350,.T.);
#881=EDGE_CURVE('',#715,#699,#357,.T.);
#883=EDGE_CURVE('',#698,#699,#595,.T.);
#885=EDGE_CURVE('',#698,#718,#364,.T.);
#887=EDGE_CURVE('',#718,#723,#372,.T.);
#889=EDGE_CURVE('',#723,#726,#379,.T.);
#891=EDGE_CURVE('',#726,#731,#387,.T.);
#893=EDGE_CURVE('',#731,#703,#394,.T.);
#895=EDGE_CURVE('',#702,#703,#522,.T.);
#897=EDGE_CURVE('',#702,#734,#401,.T.);
#899=EDGE_CURVE('',#734,#739,#409,.T.);
#901=EDGE_CURVE('',#739,#710,#416,.T.);
#909=ADVANCED_FACE('',(#860,#866,#872,#878,#904,#908),#848,.T.);
#916=EDGE_CURVE('',#667,#675,#465,.T.);
#919=EDGE_CURVE('',#666,#674,#458,.T.);
#923=ADVANCED_FACE('',(#922),#914,.F.);
#935=ADVANCED_FACE('',(#934),#928,.F.);
#942=EDGE_CURVE('',#679,#687,#479,.T.);
#945=EDGE_CURVE('',#678,#686,#472,.T.);
#949=ADVANCED_FACE('',(#948),#940,.F.);
#961=ADVANCED_FACE('',(#960),#954,.F.);
#968=EDGE_CURVE('',#683,#691,#493,.T.);
#971=EDGE_CURVE('',#682,#690,#486,.T.);
#975=ADVANCED_FACE('',(#974),#966,.F.);
#987=ADVANCED_FACE('',(#986),#980,.F.);
#993=EDGE_CURVE('',#710,#711,#500,.T.);
#996=EDGE_CURVE('',#715,#713,#609,.T.);
#1001=ADVANCED_FACE('',(#1000),#992,.F.);
#1009=EDGE_CURVE('',#739,#737,#507,.T.);
#1014=ADVANCED_FACE('',(#1013),#1006,.F.);
#1020=EDGE_CURVE('',#734,#735,#514,.T.);
#1027=ADVANCED_FACE('',(#1026),#1019,.F.);
#1035=EDGE_CURVE('',#707,#702,#544,.T.);
#1040=ADVANCED_FACE('',(#1039),#1032,.F.);
#1047=EDGE_CURVE('',#706,#703,#529,.T.);
#1053=ADVANCED_FACE('',(#1052),#1045,.F.);
#1059=EDGE_CURVE('',#731,#729,#551,.T.);
#1066=ADVANCED_FACE('',(#1065),#1058,.F.);
#1072=EDGE_CURVE('',#726,#727,#565,.T.);
#1079=ADVANCED_FACE('',(#1078),#1071,.F.);
#1085=EDGE_CURVE('',#723,#721,#558,.T.);
#1092=ADVANCED_FACE('',(#1091),#1084,.F.);
#1098=EDGE_CURVE('',#718,#719,#572,.T.);
#1105=ADVANCED_FACE('',(#1104),#1097,.F.);
#1113=EDGE_CURVE('',#695,#698,#587,.T.);
#1118=ADVANCED_FACE('',(#1117),#1110,.F.);
#1127=EDGE_CURVE('',#694,#699,#602,.T.);
#1131=ADVANCED_FACE('',(#1130),#1123,.F.);
#1143=ADVANCED_FACE('',(#1142),#1136,.F.);
#1150=EDGE_CURVE('',#745,#743,#616,.T.);
#1153=EDGE_CURVE('',#747,#742,#644,.T.);
#1157=ADVANCED_FACE('',(#1156),#1148,.T.);
#1165=EDGE_CURVE('',#653,#659,#623,.T.);
#1170=ADVANCED_FACE('',(#1169),#1162,.T.);
#1177=EDGE_CURVE('',#651,#657,#630,.T.);
#1183=ADVANCED_FACE('',(#1182),#1175,.T.);
#1190=EDGE_CURVE('',#650,#656,#637,.T.);
#1196=ADVANCED_FACE('',(#1195),#1188,.T.);
#1208=ADVANCED_FACE('',(#1207),#1201,.T.);
#1218=(LENGTH_UNIT()NAMED_UNIT(*)SI_UNIT(.MILLI.,.METRE.));
#1219=(NAMED_UNIT(*)PLANE_ANGLE_UNIT()SI_UNIT($,.RADIAN.));
#1222=(NAMED_UNIT(*)SI_UNIT($,.STERADIAN.)SOLID_ANGLE_UNIT());
#1224=(GEOMETRIC_REPRESENTATION_CONTEXT(3)GLOBAL_UNCERTAINTY_ASSIGNED_CONTEXT((
#1223))GLOBAL_UNIT_ASSIGNED_CONTEXT((#1218,#1221,#1222))REPRESENTATION_CONTEXT(
'ID1','3'));
#1225=ADVANCED_BREP_SHAPE_REPRESENTATION('',(#1210),#1224);
#1233=PRODUCT_DEFINITION('part definition','',#1232,#1229);
#1234=PRODUCT_DEFINITION_SHAPE('','SHAPE FOR BCBBBV6_CHAMBRE_SUPERIEURE.',
#1233);
#1235=SHAPE_ASPECT('','solid data associated with BCBBBV6_CHAMBRE_SUPERIEURE',
#1234,.F.);
#1236=PROPERTY_DEFINITION('',
'shape for solid data with which properties are associated',#1235);
#1237=SHAPE_REPRESENTATION('',(#1210),#1224);
#1238=SHAPE_DEFINITION_REPRESENTATION(#1236,#1237);
#1239=(LENGTH_UNIT()NAMED_UNIT(*)SI_UNIT(.MILLI.,.METRE.));
#1243=PROPERTY_DEFINITION('geometric validation property',
'area of BCBBBV6_CHAMBRE_SUPERIEURE',#1235);
#1244=REPRESENTATION('surface area',(#1242),#1224);
#1245=PROPERTY_DEFINITION_REPRESENTATION(#1243,#1244);
#1246=(LENGTH_UNIT()NAMED_UNIT(*)SI_UNIT(.MILLI.,.METRE.));
#1250=PROPERTY_DEFINITION('geometric validation property',
'volume of BCBBBV6_CHAMBRE_SUPERIEURE',#1235);
#1251=REPRESENTATION('volume',(#1249),#1224);
#1252=PROPERTY_DEFINITION_REPRESENTATION(#1250,#1251);
#1254=PROPERTY_DEFINITION('geometric validation property',
'centroid of BCBBBV6_CHAMBRE_SUPERIEURE',#1235);
#1255=REPRESENTATION('centroid',(#1253),#1224);
#1256=PROPERTY_DEFINITION_REPRESENTATION(#1254,#1255);
#1257=(LENGTH_UNIT()NAMED_UNIT(*)SI_UNIT(.MILLI.,.METRE.));
#1261=PROPERTY_DEFINITION('geometric validation property',
'area of BCBBBV6_CHAMBRE_SUPERIEURE',#1234);
#1262=REPRESENTATION('surface area',(#1260),#1224);
#1263=PROPERTY_DEFINITION_REPRESENTATION(#1261,#1262);
#1264=(LENGTH_UNIT()NAMED_UNIT(*)SI_UNIT(.MILLI.,.METRE.));
#1268=PROPERTY_DEFINITION('geometric validation property',
'volume of BCBBBV6_CHAMBRE_SUPERIEURE',#1234);
#1269=REPRESENTATION('volume',(#1267),#1224);
#1270=PROPERTY_DEFINITION_REPRESENTATION(#1268,#1269);
#1272=PROPERTY_DEFINITION('geometric validation property',
'centroid of BCBBBV6_CHAMBRE_SUPERIEURE',#1234);
#1273=REPRESENTATION('centroid',(#1271),#1224);
#1274=PROPERTY_DEFINITION_REPRESENTATION(#1272,#1273);
#1275=SHAPE_DEFINITION_REPRESENTATION(#1234,#1225);
#1277=PROPERTY_DEFINITION('PTC_COMMON_NAME','user defined attribute',#1233);
#1281=REPRESENTATION('',(#1280),#1224);
#1282=PROPERTY_DEFINITION_REPRESENTATION(#1277,#1281);
#1283=PROPERTY_DEFINITION('MATIERE','user defined attribute',#1233);
#1287=REPRESENTATION('',(#1286),#1224);
#1288=PROPERTY_DEFINITION_REPRESENTATION(#1283,#1287);
#1289=PROPERTY_DEFINITION('FOURNISSEUR','user defined attribute',#1233);
#1293=REPRESENTATION('',(#1292),#1224);
#1294=PROPERTY_DEFINITION_REPRESENTATION(#1289,#1293);
#1295=PROPERTY_DEFINITION('PRIX','user defined attribute',#1233);
#1299=REPRESENTATION('',(#1298),#1224);
#1300=PROPERTY_DEFINITION_REPRESENTATION(#1295,#1299);
#1302=REPRESENTATION('',(#1301),#1224);
#1303=PROPERTY_DEFINITION('attribute type designation','Real Number',#1296);
#1304=PROPERTY_DEFINITION_REPRESENTATION(#1303,#1302);
#1305=PROPERTY_DEFINITION('MASSE','user defined attribute',#1233);
#1309=REPRESENTATION('',(#1308),#1224);
#1310=PROPERTY_DEFINITION_REPRESENTATION(#1305,#1309);
#1312=REPRESENTATION('',(#1311),#1224);
#1313=PROPERTY_DEFINITION('attribute type designation','Real Number',#1306);
#1314=PROPERTY_DEFINITION_REPRESENTATION(#1313,#1312);
#1315=PROPERTY_DEFINITION('MASSE_KG','user defined attribute',#1233);
#1319=REPRESENTATION('',(#1318),#1224);
#1320=PROPERTY_DEFINITION_REPRESENTATION(#1315,#1319);
#1322=REPRESENTATION('',(#1321),#1224);
#1323=PROPERTY_DEFINITION('attribute type designation','Real Number',#1316);
#1324=PROPERTY_DEFINITION_REPRESENTATION(#1323,#1322);
#1325=PROPERTY_DEFINITION('PTC_MATERIAL_NAME','user defined attribute',#1233);
#1329=REPRESENTATION('',(#1328),#1224);
#1330=PROPERTY_DEFINITION_REPRESENTATION(#1325,#1329);
#1331=PROPERTY_DEFINITION('CONCEPTEUR','user defined attribute',#1233);
#1335=REPRESENTATION('',(#1334),#1224);
#1336=PROPERTY_DEFINITION_REPRESENTATION(#1331,#1335);
#1337=PROPERTY_DEFINITION('DESSIN','user defined attribute',#1233);
#1341=REPRESENTATION('',(#1340),#1224);
#1342=PROPERTY_DEFINITION_REPRESENTATION(#1337,#1341);
#1343=PROPERTY_DEFINITION('MFG_WP_MATERIAL','user defined attribute',#1233);
#1347=REPRESENTATION('',(#1346),#1224);
#1348=PROPERTY_DEFINITION_REPRESENTATION(#1343,#1347);
ENDSEC;
END-ISO-10303-21;
